# Supplementary material for: Effects of the Cistanche tubulosa Aqueous Extract on the Gut Microbiota of Mice with Intestinal Disorders
Source: Hindawi journal article supplement (doi:10.1155/2021/4936970), 2021-07-14
Supplement: f1 [file 4936970.f1.zip]

Table S2. Statistic information of 16S rRNA sequencing data

| SampleID | Total Tags | Unique Tags | Taxon Tags | Singleton Tags | OTUs |
|----------|------------|-------------|------------|----------------|------|
| A1       | 96824      | 57827       | 81643      | 15181          | 1306 |
| A2       | 85295      | 51216       | 73859      | 11436          | 1496 |
| A3       | 89389      | 54314       | 75235      | 14154          | 1278 |
| B1       | 89452      | 52879       | 73610      | 15842          | 943  |
| B2       | 87138      | 54837       | 71106      | 16032          | 1241 |
| B3       | 88442      | 51958       | 75367      | 13075          | 1196 |
| C1       | 92360      | 54950       | 77953      | 14407          | 1318 |
| C2       | 77734      | 47354       | 66510      | 11224          | 1131 |
| C3       | 88245      | 50988       | 81792      | 6453           | 2138 |
| D1       | 114285     | 64211       | 94944      | 19341          | 1535 |
| D2       | 111186     | 63146       | 95744      | 15442          | 2068 |
| D3       | 106642     | 61205       | 88255      | 18387          | 1320 |
| E1       | 125144     | 71712       | 105996     | 19148          | 1746 |
| E2       | 96093      | 56787       | 85438      | 10655          | 1300 |
| E3       | 105541     | 60131       | 88235      | 17306          | 891  |
| F1       | 119613     | 68024       | 101475     | 18138          | 1035 |
| F2       | 123561     | 63729       | 107787     | 15774          | 1032 |
| F3       | 113014     | 64280       | 98882      | 14132          | 1143 |
| Avg      | 100553     | 58308       | 85768      | 14784          | 1339 |
