# Supplementary material for: Effects of the Cistanche tubulosa Aqueous Extract on the Gut Microbiota of Mice with Intestinal Disorders
Source: Hindawi journal article supplement (doi:10.1155/2021/4936970), 2021-07-14
Supplement: f1 [file 4936970.f1.zip]

Table S1. The length of colon villi and depth of recessus

| Group | Colon villi( $\mu\text{m}$ )       | Depth of recessus( $\mu\text{m}$ ) | Villi/recessus |
|-------|------------------------------------|------------------------------------|----------------|
| A     | 1163.38 $\pm$ 170.53               | 76.10 $\pm$ 5.64                   | 15.29          |
| B     | 1110.56 $\pm$ 91.61                | 76.40 $\pm$ 5.24                   | 14.54          |
| C     | 323.76 $\pm$ 11.29 <sup>**</sup>   | 110.61 $\pm$ 15.69                 | 2.93           |
| D     | 658.15 $\pm$ 24.76 <sup>**##</sup> | 85.34 $\pm$ 4.39 <sup>##</sup>     | 7.71           |
| E     | 488.96 $\pm$ 11.27 <sup>**##</sup> | 101.64 $\pm$ 8.40 <sup>*</sup>     | 4.81           |
| F     | 485.78 $\pm$ 75.68 <sup>**</sup>   | 119.33 $\pm$ 2.75 <sup>**#</sup>   | 4.07           |

\* indicates significant difference compared with group B (P<0.05); \*\* indicates extremely significant difference compared with the group B (P<0.01); # indicates extremely difference compared with group C (P<0.05), and ## indicates extremely significant difference compared with group C (P<0.01).
