# Supplementary material for: Effects of the Cistanche tubulosa Aqueous Extract on the Gut Microbiota of Mice with Intestinal Disorders
Source: Evid Based Complement Alternat Med. 2021 Jul 14;2021:4936970. doi: 10.1155/2021/4936970 (PMC8294959; doi:10.1155/2021/4936970)
Supplement: Supplementary Materials — Figure S1: HPLC detection of the Cistanche tubulosa aqueous extract. (a) The peak of echinacoside and acteoside in the reference material appears at 5.066 min and 9.988 min separately. (b) The peak of echinacoside and acteoside in the aqueous extract appears at 5.097 min and 10.076 min separately, and the concentrations are 236 mg/g and 12.7 mg/g separately. Table S1: the length of colon villi and depth of recessus. Table S2: statistic information of the 16S rRNA sequencing data. Table S3: statistic of the operational taxonomic units among each sample. [file 4936970.f1.zip › 4936970.f1/Table_S3.txt]

Table S3. Statistic of the operational taxonomic units among each sample.
OTU	A1	A2	A3	B1	B2	B3	C1	C2	C3	D1	D2	D3	E1	E2	E3	F1	F2	F3	Taxonomy
Otu000001	9741	9206	7991	10767	8226	15914	13079	6230	14979	16501	6746	6265	21251	4298	15804	4092	23998	16161	k__Bacteria;p__Bacteroidetes;c__Bacteroidia;o__Bacteroidales;f__Muribaculaceae;g__;s__
Otu000002	11920	8950	1385	4248	3378	3098	5361	2938	819	17268	12890	6014	13576	14032	9246	19050	13607	8177	k__Bacteria;p__Bacteroidetes;c__Bacteroidia;o__Bacteroidales;f__Muribaculaceae;g__;s__
Otu000003	2641	5247	8260	5085	2287	3388	4484	644	35	8057	5735	4465	7371	9841	4320	19480	3317	5044	k__Bacteria;p__Bacteroidetes;c__Bacteroidia;o__Bacteroidales;f__Muribaculaceae;g__;s__
Otu000004	11496	4150	7663	3943	3308	1594	6441	3384	1934	7592	4147	4186	9729	3825	6169	7390	4572	5295	k__Bacteria;p__Bacteroidetes;c__Bacteroidia;o__Bacteroidales;f__Muribaculaceae;g__;s__
Otu000005	7747	4948	7583	7256	5247	5139	5635	14177	363	3028	1122	2123	3882	2598	6940	3341	3565	3282	k__Bacteria;p__Bacteroidetes;c__Bacteroidia;o__Bacteroidales;f__Rikenellaceae;g__Alistipes;s__
Otu000006	431	4941	7427	9249	2868	6918	1920	1	2648	3166	10270	3543	1536	1707	526	2717	2622	1310	k__Bacteria;p__Firmicutes;c__Bacilli;o__Lactobacillales;f__Lactobacillaceae;g__Lactobacillus;s__Lactobacillus_gasseri
Otu000007	2748	2701	2393	2853	2547	4670	3750	1643	5087	5036	2130	1781	6773	1361	4683	1153	7767	4673	k__Bacteria;p__Bacteroidetes;c__Bacteroidia;o__Bacteroidales;f__Muribaculaceae;g__;s__
Otu000008	3874	2714	3312	3365	2144	3113	2019	7726	1190	3138	2784	2922	1752	5671	4673	2397	3821	3451	k__Bacteria;p__Bacteroidetes;c__Bacteroidia;o__Bacteroidales;f__Rikenellaceae;g__Alistipes;s__
Otu000009	1662	4396	1930	2453	1394	2443	1269	1265	2609	1883	2682	2066	2211	5521	2143	5024	4174	1755	k__Bacteria;p__Bacteroidetes;c__Bacteroidia;o__Bacteroidales;f__Muribaculaceae;g__;s__
Otu000010	0	0	0	0	0	0	0	0	0	1745	18614	26295	0	0	0	0	2	10	k__Bacteria;p__Bacteroidetes;c__Bacteroidia;o__Bacteroidales;f__Muribaculaceae;g__;s__
Otu000011	5	377	4	26	1489	3827	2028	0	10960	14	472	37	428	7644	7094	3	2383	5596	k__Bacteria;p__Firmicutes;c__Erysipelotrichia;o__Erysipelotrichales;f__Erysipelotrichaceae;g__Ileibacterium;s__Ileibacterium_valens
Otu000012	554	439	2431	684	1715	755	3526	680	96	5075	1426	5768	725	917	1293	10268	973	1859	k__Bacteria;p__Firmicutes;c__Clostridia;o__Clostridiales;f__Ruminococcaceae;g__Eubacterium_coprostanoligenes_group;s__
Otu000013	1270	1843	271	9	1084	893	3668	1	887	51	45	6	98	271	72	19	6134	9587	k__Bacteria;p__Firmicutes;c__Erysipelotrichia;o__Erysipelotrichales;f__Erysipelotrichaceae;g__Faecalibaculum;s__
Otu000014	1461	890	755	1850	1048	1147	628	6288	332	1482	1644	1109	434	1035	1592	826	808	1119	k__Bacteria;p__Bacteroidetes;c__Bacteroidia;o__Bacteroidales;f__Marinifilaceae;g__Odoribacter
Otu000015	1319	736	1665	548	421	1392	967	1	910	2264	17	1002	1364	198	3879	363	608	2104	k__Bacteria;p__Bacteroidetes;c__Bacteroidia;o__Bacteroidales;f__Tannerellaceae;g__Macellibacteroides;s__
Otu000016	0	0	0	2	1	1	4480	0	0	2	0	0	0	1	0	4206	6913	3204	k__Bacteria;p__Bacteroidetes;c__Bacteroidia;o__Bacteroidales;f__Muribaculaceae;g__;s__
Otu000017	2170	17	189	893	7	44	15	1112	13396	22	694	8	39	37	41	10	18	17	k__Bacteria;p__Proteobacteria;c__Gammaproteobacteria;o__Enterobacteriales;f__Enterobacteriaceae
Otu000018	1227	656	725	1826	1156	3082	155	1924	1624	965	158	598	1190	44	1196	33	560	210	k__Bacteria;p__Firmicutes;c__Clostridia;o__Clostridiales;f__Lachnospiraceae;g__Eubacterium_fissicatena_group;s__
Otu000019	744	640	128	750	281	931	128	684	714	764	461	975	2210	1788	1207	1414	1462	699	k__Bacteria;p__Firmicutes;c__Erysipelotrichia;o__Erysipelotrichales;f__Erysipelotrichaceae;g__Erysipelatoclostridium
Otu000020	343	2165	592	822	454	579	1062	0	2237	358	939	375	1174	591	182	574	815	931	k__Bacteria;p__Firmicutes;c__Bacilli;o__Lactobacillales;f__Lactobacillaceae;g__Lactobacillus
Otu000021	585	554	488	752	486	952	874	342	1042	976	403	423	1345	291	966	287	1517	1012	k__Bacteria;p__Bacteroidetes;c__Bacteroidia;o__Bacteroidales;f__Muribaculaceae;g__;s__
Otu000022	1345	489	50	828	1079	635	1041	122	62	561	28	1941	505	699	316	640	259	1464	k__Bacteria;p__Firmicutes;c__Clostridia;o__Clostridiales;f__Peptococcaceae;g__;s__
Otu000023	432	935	220	446	346	327	178	163	398	391	266	300	262	1069	356	1417	796	320	k__Bacteria;p__Bacteroidetes;c__Bacteroidia;o__Bacteroidales;f__Muribaculaceae;g__;s__
Otu000024	274	1150	547	350	607	328	1633	0	334	269	386	372	400	331	222	219	266	799	k__Bacteria;p__Firmicutes;c__Bacilli;o__Lactobacillales;f__Lactobacillaceae;g__Lactobacillus;s__Lactobacillus_reuteri
Otu000025	337	338	280	418	282	586	511	188	633	665	211	219	760	158	548	165	869	589	k__Bacteria;p__Bacteroidetes;c__Bacteroidia;o__Bacteroidales;f__Muribaculaceae;g__;s__
Otu000026	67	85	220	23	199	25	710	13	3	14	64	4	52	194	123	196	61	5617	k__Bacteria;p__Firmicutes;c__Clostridia;o__Clostridiales;f__Ruminococcaceae;g__Ruminococcaceae_UCG-014;s__
Otu000027	309	337	280	406	239	510	515	204	574	569	199	224	743	159	550	165	728	574	k__Bacteria;p__Bacteroidetes;c__Bacteroidia;o__Bacteroidales;f__Muribaculaceae;g__;s__
Otu000028	0	0	0	2596	1951	635	0	0	0	0	0	0	0	0	0	2	2	0	k__Bacteria;p__Bacteroidetes;c__Bacteroidia;o__Bacteroidales;f__Marinifilaceae;g__Odoribacter
Otu000029	106	44	938	196	659	315	0	0	0	528	47	0	259	0	550	585	409	528	k__Bacteria;p__Firmicutes;c__Clostridia;o__Clostridiales;f__Ruminococcaceae;g__Eubacterium_coprostanoligenes_group
Otu000030	575	38	208	218	404	88	89	266	1	50	1099	665	81	387	40	344	186	362	k__Bacteria;p__Firmicutes;c__Clostridia;o__Clostridiales;f__Ruminococcaceae;g__Ruminococcaceae_UCG-014;s__
Otu000031	1205	2	35	1	95	0	231	1797	22	12	11	11	33	257	0	19	393	756	k__Bacteria;p__Firmicutes;c__Clostridia;o__Clostridiales;f__Ruminococcaceae;g__Ruminococcaceae_UCG-014;s__
Otu000032	198	156	160	328	162	485	321	116	246	396	87	117	451	46	404	74	535	348	k__Bacteria;p__Bacteroidetes;c__Bacteroidia;o__Bacteroidales;f__Muribaculaceae
Otu000033	49	614	111	102	304	244	59	68	139	59	40	21	1392	0	71	886	253	0	k__Bacteria;p__Firmicutes;c__Erysipelotrichia;o__Erysipelotrichales;f__Erysipelotrichaceae;g__Candidatus_Stoquefichus;s__
Otu000034	32	65	293	124	476	173	147	325	29	149	441	479	423	210	454	191	101	40	k__Bacteria;p__Firmicutes;c__Clostridia;o__Clostridiales;f__Ruminococcaceae;g__Ruminiclostridium;s__
Otu000035	6	418	370	23	1640	7	31	3	0	23	334	68	6	858	108	77	31	0	k__Bacteria;p__Firmicutes;c__Clostridia;o__Clostridiales;f__Lachnospiraceae;g__Roseburia;s__
Otu000036	361	503	26	1106	110	255	29	0	22	95	22	14	829	134	168	137	54	34	k__Bacteria;p__Firmicutes;c__Erysipelotrichia;o__Erysipelotrichales;f__Erysipelotrichaceae;g__Erysipelatoclostridium;s__
Otu000037	816	213	90	2	0	0	328	0	0	0	18	105	6	0	5	887	1232	29	k__Bacteria;p__Firmicutes;c__Clostridia;o__Clostridiales;f__Ruminococcaceae;g__Ruminococcus_1;s__Ruminococcus_flavefaciens
Otu000038	194	18	788	91	143	50	43	435	86	8	1115	103	382	24	37	6	28	134	k__Bacteria;p__Firmicutes;c__Clostridia;o__Clostridiales;f__Lachnospiraceae;g__Lachnospiraceae_NK4A136_group;s__
Otu000039	341	85	32	105	43	19	436	310	3	414	805	213	163	65	20	429	3	115	k__Bacteria;p__Firmicutes;c__Clostridia;o__Clostridiales;f__Ruminococcaceae;g__Ruminococcaceae_UCG-014;s__
Otu000040	225	83	63	13	135	79	79	22	408	5	1587	28	61	402	33	38	108	46	k__Bacteria;p__Firmicutes;c__Clostridia;o__Clostridiales;f__Lachnospiraceae;g__Lachnospiraceae_NK4A136_group
Otu000041	140	149	148	194	97	251	262	125	207	260	77	81	361	63	271	81	307	240	k__Bacteria;p__Bacteroidetes;c__Bacteroidia;o__Bacteroidales;f__Muribaculaceae;g__;s__
Otu000042	192	83	357	633	71	225	40	58	119	11	444	129	29	398	159	124	17	39	k__Bacteria;p__Firmicutes;c__Clostridia;o__Clostridiales;f__Lachnospiraceae
Otu000043	29	0	20	28	349	16	22	11	87	17	102	84	229	754	1180	38	4	3	k__Bacteria;p__Firmicutes;c__Clostridia;o__Clostridiales;f__Lachnospiraceae;g__Lachnospiraceae_NK4A136_group
Otu000044	268	26	343	23	193	158	6	6	1	40	3	384	615	0	133	304	128	242	k__Bacteria;p__Firmicutes;c__Clostridia;o__Clostridiales;f__Ruminococcaceae;g__Eubacterium_coprostanoligenes_group;s__
Otu000045	120	131	101	167	102	223	181	99	229	190	93	87	285	67	191	61	308	223	k__Bacteria;p__Bacteroidetes;c__Bacteroidia;o__Bacteroidales;f__Muribaculaceae;g__;s__
Otu000046	482	0	5	0	384	39	267	102	15	56	9	0	931	172	2	4	104	258	k__Bacteria;p__Firmicutes;c__Clostridia;o__Clostridiales;f__Ruminococcaceae;g__Ruminococcaceae_UCG-014;s__
Otu000047	51	59	313	95	547	102	31	174	136	43	150	86	262	177	109	75	29	26	k__Bacteria;p__Firmicutes;c__Clostridia;o__Clostridiales;f__Ruminococcaceae
Otu000048	17	463	86	18	31	11	29	133	221	22	10	691	8	276	3	155	16	110	k__Bacteria;p__Firmicutes;c__Clostridia;o__Clostridiales;f__Lachnospiraceae;g__Lachnospiraceae_NK4A136_group;s__
Otu000049	2	10	36	43	36	112	7	1	1150	0	5	1	9	320	413	14	34	1	k__Bacteria;p__Firmicutes;c__Clostridia;o__Clostridiales;f__Peptostreptococcaceae;g__Romboutsia;s__
Otu000050	15	63	28	1	0	14	131	1	3	428	37	5	4	801	9	424	0	73	k__Bacteria;p__Firmicutes;c__Clostridia;o__Clostridiales;f__Ruminococcaceae;g__Ruminococcus_1
Otu000051	103	320	138	26	90	129	319	26	0	50	31	54	264	18	32	69	165	198	k__Bacteria;p__Firmicutes;c__Clostridia;o__Clostridiales;f__Ruminococcaceae;g__Ruminococcaceae_UCG-005;s__
Otu000052	34	12	14	5	226	204	4	1074	155	0	9	28	26	29	2	6	12	189	k__Bacteria;p__Firmicutes;c__Clostridia;o__Clostridiales;f__Ruminococcaceae
Otu000053	65	94	47	75	249	101	71	123	81	18	91	206	270	159	113	95	70	88	k__Bacteria;p__Firmicutes;c__Clostridia;o__Clostridiales;f__Ruminococcaceae;g__Ruminiclostridium_9;s__
Otu000054	8	22	462	50	188	110	8	128	16	47	124	91	287	244	75	61	33	18	k__Bacteria;p__Firmicutes;c__Clostridia;o__Clostridiales;f__Ruminococcaceae;g__Intestinimonas;s__
Otu000055	7	249	9	0	1	1	3	8	1499	1	5	5	13	116	22	1	2	0	k__Bacteria;p__Firmicutes;c__Erysipelotrichia;o__Erysipelotrichales;f__Erysipelotrichaceae;g__Turicibacter;s__
Otu000056	160	185	81	41	269	25	5	6	3	27	5	216	676	132	16	9	0	74	k__Bacteria;p__Firmicutes;c__Clostridia;o__Clostridiales;f__Lachnospiraceae
Otu000057	9	280	73	187	410	136	12	56	164	113	28	46	81	98	59	49	16	6	k__Bacteria;p__Firmicutes;c__Clostridia;o__Clostridiales;f__Ruminococcaceae;g__Ruminiclostridium;s__
Otu000058	76	113	45	119	68	126	142	54	132	139	42	44	157	39	124	44	212	128	k__Bacteria;p__Bacteroidetes;c__Bacteroidia;o__Bacteroidales;f__Muribaculaceae;g__;s__
Otu000059	2	40	47	111	298	57	64	123	12	220	26	103	20	107	73	314	99	9	k__Bacteria;p__Firmicutes;c__Clostridia;o__Clostridiales;f__Ruminococcaceae
Otu000060	75	3	1215	1	171	62	135	6	0	0	1	38	0	2	0	0	0	0	k__Bacteria;p__Firmicutes;c__Clostridia;o__Clostridiales;f__Lachnospiraceae;g__Lachnospiraceae_NK4A136_group
Otu000061	176	18	12	1	63	19	65	312	1	0	329	50	12	83	6	139	164	256	k__Bacteria;p__Firmicutes;c__Clostridia;o__Clostridiales;f__Ruminococcaceae;g__Ruminococcaceae_UCG-014;s__
Otu000062	1	212	0	0	32	1	0	123	0	0	0	0	174	1018	0	11	92	0	k__Bacteria;p__Tenericutes;c__Mollicutes;o__Anaeroplasmatales;f__Anaeroplasmataceae;g__Anaeroplasma;s__
Otu000063	3	2	265	95	6	0	66	3	194	183	189	58	77	291	158	66	1	0	k__Bacteria;p__Firmicutes;c__Clostridia;o__Clostridiales;f__Lachnospiraceae;g__A2;s__Lachnospiraceae_bacterium_597
Otu000064	158	244	48	59	153	99	180	2	14	25	0	133	64	20	36	31	106	280	k__Bacteria;p__Firmicutes;c__Clostridia;o__Clostridiales;f__Ruminococcaceae;g__Ruminiclostridium_1;s__
Otu000065	188	17	162	93	57	110	65	133	28	8	285	81	45	53	177	74	16	28	k__Bacteria;p__Firmicutes;c__Clostridia;o__Clostridiales;f__Lachnospiraceae
Otu000066	537	3	193	74	7	69	4	68	88	17	52	239	101	0	27	90	1	46	k__Bacteria;p__Firmicutes;c__Clostridia;o__Clostridiales;f__Lachnospiraceae;g__Lachnospiraceae_NK4A136_group;s__
Otu000067	9	14	9	2	15	3	22	10	233	308	61	44	748	98	4	11	10	7	k__Bacteria;p__Proteobacteria;c__Alphaproteobacteria;o__Sphingomonadales;f__Sphingomonadaceae;g__Sphingomonas;s__Sphingomonas_paucimobilis
Otu000068	11	120	78	0	150	7	644	0	0	307	1	11	133	16	8	13	0	104	k__Bacteria;p__Firmicutes;c__Clostridia;o__Clostridiales;f__Ruminococcaceae;g__Ruminococcus_1;s__Ruminococcus_flavefaciens
Otu000069	21	88	128	22	38	7	5	23	323	30	23	9	786	32	3	9	16	12	k__Bacteria;p__Epsilonbacteraeota;c__Campylobacteria;o__Campylobacterales;f__Helicobacteraceae;g__Helicobacter;s__Helicobacter_mastomyrinus
Otu000070	115	162	11	78	109	40	50	6	3	76	164	53	266	153	51	130	30	63	k__Bacteria;p__Firmicutes;c__Clostridia;o__Clostridiales;f__Family_XIII;g__Eubacterium_nodatum_group;s__
Otu000071	31	1	24	73	275	132	12	132	45	14	273	13	101	74	160	19	154	14	k__Bacteria;p__Firmicutes;c__Clostridia;o__Clostridiales;f__Lachnospiraceae
Otu000072	0	4	270	293	431	2	11	2	0	71	12	39	129	157	44	17	33	0	k__Bacteria;p__Firmicutes;c__Clostridia;o__Clostridiales;f__Ruminococcaceae;g__Anaerotruncus
Otu000073	167	61	110	93	48	38	138	38	36	115	21	43	227	15	143	33	77	86	k__Bacteria;p__Bacteroidetes;c__Bacteroidia;o__Bacteroidales;f__Muribaculaceae
Otu000074	0	47	73	131	76	26	18	5	94	12	186	394	64	84	197	55	11	1	k__Bacteria;p__Firmicutes;c__Clostridia;o__Clostridiales;f__Lachnospiraceae;g__Lachnoclostridium
Otu000075	171	98	168	92	135	98	47	8	0	163	1	8	73	73	72	4	59	193	k__Bacteria;p__Firmicutes;c__Clostridia;o__Clostridiales;f__Christensenellaceae;g__Christensenellaceae_R-7_group;s__bacterium_YE57
Otu000076	158	26	45	1	106	105	20	116	22	58	2	14	255	29	141	209	51	100	k__Bacteria;p__Firmicutes;c__Erysipelotrichia;o__Erysipelotrichales;f__Erysipelotrichaceae
Otu000077	43	63	45	92	50	145	92	38	72	126	21	26	199	14	132	17	184	90	k__Bacteria;p__Bacteroidetes;c__Bacteroidia;o__Bacteroidales;f__Muribaculaceae;g__;s__
Otu000078	0	0	35	106	418	80	6	1	12	4	0	76	78	157	172	106	81	5	k__Bacteria;p__Firmicutes;c__Clostridia;o__Clostridiales;f__Lachnospiraceae;g__Lachnoclostridium
Otu000079	80	0	19	0	135	115	67	36	1	69	41	13	101	220	32	39	220	132	k__Bacteria;p__Firmicutes;c__Clostridia;o__Clostridiales;f__Lachnospiraceae;g__Eubacterium_ventriosum_group;s__
Otu000080	0	0	0	0	0	0	0	0	0	0	1	0	0	11	1298	0	0	0	k__Bacteria;p__Bacteroidetes;c__Bacteroidia;o__Bacteroidales;f__Muribaculaceae;g__;s__
Otu000081	41	1	23	4	228	191	0	0	0	7	1	1	1	277	0	227	204	52	k__Bacteria;p__Tenericutes;c__Mollicutes;o__Mollicutes_RF39;f__;g__;s__
Otu000082	80	22	61	51	84	49	21	99	0	16	122	115	10	52	16	49	236	111	k__Bacteria;p__Firmicutes;c__Clostridia;o__Clostridiales;f__Ruminococcaceae;g__Ruminococcaceae_UCG-014;s__
Otu000083	8	43	72	31	264	19	7	93	21	12	55	72	289	68	28	50	49	12	k__Bacteria;p__Firmicutes;c__Clostridia;o__Clostridiales;f__Ruminococcaceae
Otu000084	0	0	88	43	22	0	6	68	57	36	148	581	6	1	108	0	8	0	k__Bacteria;p__Firmicutes;c__Clostridia;o__Clostridiales;f__Lachnospiraceae;g__Roseburia;s__
Otu000085	116	63	586	11	0	7	141	0	3	4	53	4	89	65	3	2	0	8	k__Bacteria;p__Firmicutes;c__Clostridia;o__Clostridiales;f__Lachnospiraceae;g__Lachnospiraceae_NK4A136_group;s__
Otu000086	0	0	0	0	1119	9	0	19	0	0	0	0	6	0	2	0	0	0	k__Bacteria;p__Firmicutes;c__Clostridia;o__Clostridiales;f__Lachnospiraceae;g__Lachnospiraceae_NK4A136_group;s__
Otu000087	0	1	7	0	0	3	49	0	21	43	256	411	0	6	0	85	223	39	k__Bacteria;p__Actinobacteria;c__Coriobacteriia;o__Coriobacteriales;f__Eggerthellaceae
Otu000088	0	61	0	0	0	19	150	14	1	20	191	115	0	0	33	186	98	240	k__Bacteria;p__Firmicutes;c__Clostridia;o__Clostridiales;f__Ruminococcaceae;g__Ruminococcaceae_UCG-010;s__
Otu000089	0	62	41	98	75	9	1	0	0	17	16	0	676	44	14	1	39	8	k__Bacteria;p__Firmicutes;c__Clostridia;o__Clostridiales;f__Ruminococcaceae
Otu000090	0	7	1	0	323	0	0	743	0	0	0	0	0	0	0	0	0	0	k__Bacteria;p__Firmicutes;c__Clostridia;o__Clostridiales;f__Ruminococcaceae;g__Ruminococcaceae_UCG-014;s__
Otu000091	55	27	36	73	67	22	18	5	1	2	255	193	4	226	59	12	18	1	k__Bacteria;p__Firmicutes;c__Clostridia;o__Clostridiales;f__Lachnospiraceae
Otu000092	0	1	15	39	38	0	28	44	4	256	11	209	143	128	30	50	72	6	k__Bacteria;p__Firmicutes;c__Erysipelotrichia;o__Erysipelotrichales;f__Erysipelotrichaceae
Otu000093	180	79	283	10	20	0	16	6	79	3	0	86	150	31	70	3	42	14	k__Bacteria;p__Firmicutes;c__Clostridia;o__Clostridiales;f__Lachnospiraceae;g__Lachnospiraceae_NK4A136_group;s__
Otu000094	2	0	0	2	0	0	2	862	34	12	0	4	0	0	0	104	0	3	k__Bacteria;p__Firmicutes;c__Clostridia;o__Clostridiales;f__Lachnospiraceae;g__Lachnospiraceae_NK4A136_group
Otu000095	159	66	92	36	14	9	5	2	6	208	0	12	108	34	56	184	9	6	k__Bacteria;p__Verrucomicrobia;c__Verrucomicrobiae;o__Verrucomicrobiales;f__Akkermansiaceae;g__Akkermansia;s__
Otu000096	77	96	67	41	43	40	30	51	130	55	56	92	39	40	20	41	19	45	k__Bacteria;p__Actinobacteria;c__Coriobacteriia;o__Coriobacteriales;f__Eggerthellaceae
Otu000097	20	66	5	9	6	36	12	295	14	16	23	187	16	176	18	31	39	1	k__Bacteria;p__Firmicutes;c__Clostridia;o__Clostridiales;f__Clostridiales_vadinBB60_group;g__;s__
Otu000098	107	42	82	36	26	16	54	42	12	66	35	36	110	38	84	70	31	49	k__Bacteria;p__Bacteroidetes;c__Bacteroidia;o__Bacteroidales;f__Muribaculaceae;g__;s__
Otu000099	11	21	147	16	47	34	30	5	71	18	22	21	30	131	9	53	231	14	k__Bacteria;p__Firmicutes;c__Bacilli;o__Lactobacillales;f__Lactobacillaceae;g__Lactobacillus
Otu000100	35	41	72	29	50	136	47	2	0	70	135	69	40	50	13	19	52	46	k__Bacteria;p__Firmicutes;c__Clostridia;o__Clostridiales;f__Christensenellaceae;g__Christensenellaceae_R-7_group
Otu000101	5	0	0	5	35	0	0	246	579	14	0	9	0	2	0	5	0	3	k__Bacteria;p__Firmicutes;c__Clostridia;o__Clostridiales;f__Lachnospiraceae;g__Lachnospiraceae_NK4A136_group;s__
Otu000102	37	137	18	1	19	62	5	160	4	6	78	251	57	21	8	27	5	6	k__Bacteria;p__Firmicutes;c__Clostridia;o__Clostridiales;f__Clostridiales_vadinBB60_group;g__Clostridiales_bacterium_enrichment_culture_clone_06-1235251-76;s__
Otu000103	12	34	48	6	50	32	68	16	2	105	137	23	58	114	27	79	43	46	k__Bacteria;p__Firmicutes;c__Clostridia;o__Clostridiales;f__Ruminococcaceae
Otu000104	26	141	20	17	151	1	107	13	2	2	307	0	9	41	27	15	18	1	k__Bacteria;p__Firmicutes;c__Clostridia;o__Clostridiales;f__Lachnospiraceae;g__Lachnospiraceae_NK4A136_group;s__
Otu000105	159	14	22	7	64	42	15	4	2	24	135	17	53	87	34	67	28	105	k__Bacteria;p__Firmicutes;c__Erysipelotrichia;o__Erysipelotrichales;f__Erysipelotrichaceae;g__;s__
Otu000106	52	24	63	20	32	21	13	113	17	4	99	78	42	140	16	85	10	47	k__Bacteria;p__Firmicutes;c__Clostridia;o__Clostridiales;f__Lachnospiraceae;g__Lachnospiraceae_UCG-006
Otu000107	0	16	1	20	427	8	3	5	0	0	7	48	59	192	55	16	15	2	k__Bacteria;p__Firmicutes;c__Clostridia;o__Clostridiales;f__Lachnospiraceae;g__Eubacterium_xylanophilum_group;s__
Otu000108	146	32	18	37	11	10	28	24	6	105	34	20	117	26	89	78	43	43	k__Bacteria;p__Bacteroidetes;c__Bacteroidia;o__Bacteroidales;f__Muribaculaceae;g__;s__
Otu000109	0	48	183	56	204	1	15	145	0	0	12	95	96	1	0	0	4	1	k__Bacteria;p__Firmicutes;c__Clostridia;o__Clostridiales;f__Lachnospiraceae
Otu000110	0	0	31	50	37	38	0	456	6	98	0	1	5	108	8	3	1	0	k__Bacteria;p__Firmicutes;c__Clostridia;o__Clostridiales;f__Lachnospiraceae;g__Blautia;s__Lachnospiraceae_bacterium_28-4
Otu000111	62	35	124	5	147	72	12	25	5	0	64	20	94	96	20	50	2	0	k__Bacteria;p__Firmicutes;c__Clostridia;o__Clostridiales;f__Lachnospiraceae
Otu000112	30	62	18	50	10	20	26	4	0	97	53	24	79	94	44	154	27	35	k__Bacteria;p__Bacteroidetes;c__Bacteroidia;o__Bacteroidales;f__Muribaculaceae;g__;s__
Otu000113	68	43	5	36	10	27	41	14	6	103	35	29	143	25	93	32	75	38	k__Bacteria;p__Bacteroidetes;c__Bacteroidia;o__Bacteroidales;f__Muribaculaceae;g__;s__
Otu000114	40	33	29	41	43	65	42	17	69	64	29	18	82	26	60	17	77	65	k__Bacteria;p__Bacteroidetes;c__Bacteroidia;o__Bacteroidales;f__Muribaculaceae;g__;s__
Otu000115	129	0	1	0	76	78	11	81	2	0	0	5	63	39	2	29	96	189	k__Bacteria;p__Firmicutes;c__Clostridia;o__Clostridiales;f__Ruminococcaceae;g__Ruminococcaceae_UCG-010;s__
Otu000116	60	49	4	24	12	16	28	10	4	92	74	35	64	61	48	98	63	42	k__Bacteria;p__Bacteroidetes;c__Bacteroidia;o__Bacteroidales;f__Muribaculaceae;g__;s__
Otu000117	0	103	25	20	83	51	0	15	28	25	37	37	228	94	7	16	8	5	k__Bacteria;p__Firmicutes;c__Clostridia;o__Clostridiales;f__Lachnospiraceae;g__ASF356;s__
Otu000118	58	45	34	11	59	41	20	194	40	4	24	36	50	29	9	25	11	91	k__Bacteria;p__Firmicutes;c__Clostridia;o__Clostridiales;f__Ruminococcaceae
Otu000119	38	48	64	40	63	26	28	26	43	11	175	73	22	53	30	13	16	7	k__Bacteria;p__Firmicutes;c__Clostridia;o__Clostridiales;f__Lachnospiraceae;g__;s__
Otu000120	88	132	8	4	103	25	40	4	6	7	20	16	157	19	10	19	34	84	k__Bacteria;p__Firmicutes;c__Clostridia;o__Clostridiales;f__Family_XIII;g__Anaerovorax;s__
Otu000121	28	37	30	35	24	52	44	11	51	65	20	18	64	17	56	17	117	49	k__Bacteria;p__Bacteroidetes;c__Bacteroidia;o__Bacteroidales;f__Muribaculaceae;g__;s__
Otu000122	2	20	6	88	78	135	57	0	46	22	149	6	20	62	2	24	4	12	k__Bacteria;p__Firmicutes;c__Clostridia;o__Clostridiales;f__Lachnospiraceae;g__Lachnospiraceae_NK4A136_group
Otu000123	28	16	59	21	12	35	30	9	127	28	40	54	39	99	16	31	56	25	k__Bacteria;p__Actinobacteria;c__Coriobacteriia;o__Coriobacteriales;f__Eggerthellaceae;g__Enterorhabdus;s__
Otu000124	143	64	2	1	22	57	42	80	0	2	0	26	49	5	1	15	90	125	k__Bacteria;p__Firmicutes;c__Clostridia;o__Clostridiales;f__Ruminococcaceae;g__Ruminococcaceae_UCG-010;s__
Otu000125	1	13	0	2	0	0	0	1	0	6	0	2	0	528	170	1	0	0	k__Bacteria;p__Firmicutes;c__Erysipelotrichia;o__Erysipelotrichales;f__Erysipelotrichaceae;g__Candidatus_Stoquefichus;s__
Otu000126	4	11	285	28	84	5	2	31	10	7	13	142	47	19	12	3	2	19	k__Bacteria;p__Firmicutes;c__Clostridia;o__Clostridiales;f__Lachnospiraceae;g__GCA-900066575;s__
Otu000127	10	31	77	13	160	9	6	65	81	4	25	31	86	40	20	23	23	10	k__Bacteria;p__Firmicutes;c__Clostridia;o__Clostridiales;f__Ruminococcaceae
Otu000128	11	54	0	0	354	5	76	3	6	0	0	76	60	27	4	0	33	5	k__Bacteria;p__Firmicutes;c__Clostridia;o__Clostridiales;f__Ruminococcaceae;g__Ruminococcus_1;s__
Otu000129	30	30	19	35	4	9	22	6	0	95	49	22	63	48	28	197	23	32	k__Bacteria;p__Bacteroidetes;c__Bacteroidia;o__Bacteroidales;f__Muribaculaceae;g__;s__
Otu000130	17	41	4	8	14	1	21	156	41	5	25	0	19	79	1	23	192	64	k__Bacteria;p__Firmicutes;c__Clostridia;o__Clostridiales;f__Ruminococcaceae;g__Ruminococcaceae_UCG-013;s__
Otu000131	11	7	4	2	618	5	2	9	1	1	4	7	1	4	7	4	1	2	k__Bacteria;p__Firmicutes;c__Clostridia;o__Clostridiales;f__Lachnospiraceae;g__Ruminococcus_torques_group
Otu000132	13	5	26	15	474	22	5	3	1	3	44	5	10	4	11	0	23	15	k__Bacteria;p__Firmicutes;c__Clostridia;o__Clostridiales;f__Lachnospiraceae;g__Lachnospiraceae_NK4A136_group
Otu000133	1	58	0	19	15	150	7	0	29	5	28	70	85	157	0	10	16	7	k__Bacteria;p__Firmicutes;c__Clostridia;o__Clostridiales;f__Lachnospiraceae;g__Lachnospiraceae_NK4A136_group
Otu000134	21	24	94	41	47	36	11	14	34	7	183	43	38	21	20	10	5	2	k__Bacteria;p__Firmicutes;c__Clostridia;o__Clostridiales;f__Lachnospiraceae;g__Lachnospiraceae_NK4A136_group;s__
Otu000135	28	6	69	50	19	13	89	2	6	26	81	45	37	34	28	26	49	32	k__Bacteria;p__Firmicutes;c__Clostridia;o__Clostridiales;f__Christensenellaceae;g__Christensenellaceae_R-7_group;s__
Otu000136	6	24	24	58	118	15	4	30	89	20	44	23	31	89	37	15	2	9	k__Bacteria;p__Firmicutes;c__Clostridia;o__Clostridiales;f__Lachnospiraceae;g__Blautia;s__Lachnospiraceae_bacterium_615
Otu000137	40	64	0	2	2	7	95	0	11	6	0	2	29	79	53	0	53	190	k__Bacteria;p__Actinobacteria;c__Coriobacteriia;o__Coriobacteriales;f__Atopobiaceae;g__Coriobacteriaceae_UCG-002;s__
Otu000138	51	32	4	27	7	26	33	11	3	91	21	7	99	23	54	21	73	36	k__Bacteria;p__Bacteroidetes;c__Bacteroidia;o__Bacteroidales;f__Muribaculaceae;g__;s__
Otu000139	34	0	27	1	144	56	25	2	0	1	0	48	48	110	10	68	5	39	k__Bacteria;p__Firmicutes;c__Clostridia;o__Clostridiales;f__Christensenellaceae;g__Christensenellaceae_R-7_group;s__
Otu000140	38	25	35	37	21	19	16	94	10	27	19	38	15	65	53	35	34	24	k__Bacteria;p__Bacteroidetes;c__Bacteroidia;o__Bacteroidales;f__Rikenellaceae;g__Alistipes
Otu000141	11	18	52	25	11	13	19	1	0	45	24	24	45	69	32	158	18	30	k__Bacteria;p__Bacteroidetes;c__Bacteroidia;o__Bacteroidales;f__Muribaculaceae;g__;s__
Otu000142	114	5	14	0	18	28	37	14	1	1	61	50	2	45	17	1	117	66	k__Bacteria;p__Tenericutes;c__Mollicutes;o__Mollicutes_RF39;f__;g__;s__
Otu000143	43	7	185	1	7	2	0	11	2	4	36	1	42	218	1	23	5	0	k__Bacteria;p__Firmicutes;c__Clostridia;o__Clostridiales;f__Lachnospiraceae;g__;s__
Otu000144	13	12	19	86	42	17	7	0	0	58	1	23	92	12	11	121	45	25	k__Bacteria;p__Firmicutes;c__Clostridia;o__Clostridiales;f__Ruminococcaceae;g__UBA1819;s__
Otu000145	41	16	5	14	106	8	50	22	0	0	13	76	37	69	5	70	20	32	k__Bacteria;p__Firmicutes;c__Clostridia;o__Clostridiales;f__Ruminococcaceae;g__Ruminococcaceae_NK4A214_group;s__
Otu000146	0	0	0	0	125	1	0	0	0	0	0	0	106	0	0	0	0	346	k__Bacteria;p__Firmicutes;c__Clostridia;o__Clostridiales;f__Ruminococcaceae;g__Ruminococcus_1
Otu000147	33	25	28	45	15	56	31	52	12	58	15	13	27	8	59	4	64	27	k__Bacteria;p__Bacteroidetes;c__Bacteroidia;o__Bacteroidales
Otu000148	18	27	45	68	11	31	26	2	0	73	10	24	67	19	31	42	26	36	k__Bacteria;p__Bacteroidetes;c__Bacteroidia;o__Bacteroidales;f__Muribaculaceae;g__;s__
Otu000149	9	17	13	62	30	20	2	11	34	12	48	30	31	34	105	81	10	4	k__Bacteria;p__Firmicutes;c__Clostridia;o__Clostridiales;f__Ruminococcaceae
Otu000150	2	3	15	118	49	18	5	14	57	7	24	37	27	51	94	21	7	1	k__Bacteria;p__Firmicutes;c__Clostridia;o__Clostridiales;f__Ruminococcaceae;g__GCA-900066225
Otu000151	9	40	46	44	7	42	12	6	0	30	22	23	29	62	34	106	21	15	k__Bacteria;p__Bacteroidetes;c__Bacteroidia;o__Bacteroidales;f__Muribaculaceae;g__;s__
Otu000152	70	17	34	30	9	26	55	20	9	61	11	16	75	6	39	13	31	24	k__Bacteria;p__Bacteroidetes;c__Bacteroidia;o__Bacteroidales;f__Muribaculaceae;g__;s__
Otu000153	55	17	51	29	6	18	33	20	11	52	21	12	93	9	49	15	26	28	k__Bacteria;p__Bacteroidetes;c__Bacteroidia;o__Bacteroidales;f__Muribaculaceae;g__;s__
Otu000154	0	45	51	23	88	5	0	6	148	11	15	17	35	18	32	24	9	5	k__Bacteria;p__Firmicutes;c__Clostridia;o__Clostridiales;f__Ruminococcaceae;g__Negativibacillus;s__
Otu000155	21	20	23	22	15	44	40	13	56	49	18	9	53	7	37	10	47	47	k__Bacteria;p__Bacteroidetes;c__Bacteroidia;o__Bacteroidales;f__Muribaculaceae;g__;s__
Otu000156	26	21	17	30	15	61	29	8	44	45	21	20	39	13	37	17	39	46	k__Bacteria;p__Bacteroidetes;c__Bacteroidia;o__Bacteroidales
Otu000157	0	0	0	0	183	1	0	0	0	1	0	1	7	0	7	0	0	326	k__Bacteria;p__Firmicutes;c__Clostridia;o__Clostridiales;f__Lachnospiraceae
Otu000158	20	32	136	23	30	20	2	9	31	7	46	38	53	24	16	18	6	11	k__Bacteria;p__Firmicutes;c__Clostridia;o__Clostridiales;f__Lachnospiraceae;g__Lachnoclostridium;s__
Otu000159	31	86	19	4	10	13	60	2	0	5	118	14	2	37	5	14	30	68	k__Bacteria;p__Firmicutes;c__Clostridia;o__Clostridiales;f__Ruminococcaceae;g__Ruminococcaceae_UCG-010;s__
Otu000160	33	45	4	34	8	24	35	8	1	71	23	12	60	23	38	25	48	22	k__Bacteria;p__Bacteroidetes;c__Bacteroidia;o__Bacteroidales;f__Muribaculaceae;g__;s__
Otu000161	5	13	5	1	4	2	6	0	42	1	192	2	57	5	6	83	87	1	k__Bacteria;p__Firmicutes;c__Erysipelotrichia;o__Erysipelotrichales;f__Erysipelotrichaceae
Otu000162	11	15	56	14	83	17	15	8	5	6	30	29	29	60	22	76	24	12	k__Bacteria;p__Firmicutes;c__Clostridia;o__Clostridiales;f__Lachnospiraceae
Otu000163	384	0	18	0	73	0	0	5	0	0	0	0	11	19	0	0	0	0	k__Bacteria;p__Firmicutes;c__Clostridia;o__Clostridiales;f__Ruminococcaceae;g__Ruminococcaceae_UCG-010;s__
Otu000164	0	2	22	6	0	74	3	0	0	6	2	110	208	16	1	32	26	0	k__Bacteria;p__Firmicutes;c__Erysipelotrichia;o__Erysipelotrichales;f__Erysipelotrichaceae;g__;s__
Otu000165	8	19	107	32	13	21	13	17	0	48	14	39	47	5	9	45	37	31	k__Bacteria;p__Firmicutes;c__Clostridia;o__Clostridiales;f__Ruminococcaceae;g__;s__
Otu000166	0	15	61	15	30	11	20	2	44	26	19	23	45	40	36	70	43	3	k__Bacteria;p__Actinobacteria;c__Coriobacteriia;o__Coriobacteriales;f__Eggerthellaceae
Otu000167	1	51	14	14	185	1	56	7	25	17	3	12	19	10	7	3	66	9	k__Bacteria;p__Firmicutes;c__Clostridia;o__Clostridiales;f__Ruminococcaceae;g__Ruminiclostridium_5;s__
Otu000168	198	11	0	0	28	6	1	117	1	1	12	8	6	11	4	41	31	20	k__Bacteria;p__Firmicutes;c__Clostridia;o__Clostridiales;f__Ruminococcaceae;g__Ruminococcaceae_UCG-014;s__
Otu000169	0	5	10	5	364	0	16	0	0	14	0	6	67	0	0	0	0	6	k__Bacteria;p__Firmicutes;c__Clostridia;o__Clostridiales;f__Lachnospiraceae
Otu000170	4	11	63	43	85	13	9	6	5	16	17	31	41	48	24	39	21	11	k__Bacteria;p__Firmicutes;c__Clostridia;o__Clostridiales;f__Ruminococcaceae
Otu000171	4	0	37	2	182	23	4	8	19	2	64	32	45	40	2	4	6	6	k__Bacteria;p__Firmicutes;c__Clostridia;o__Clostridiales;f__Lachnospiraceae;g__Lachnospiraceae_NK4A136_group;s__
Otu000172	23	8	13	52	44	19	19	9	24	6	31	38	54	41	48	22	24	2	k__Bacteria;p__Firmicutes;c__Clostridia;o__Clostridiales;f__Lachnospiraceae;g__;s__
Otu000173	50	10	39	39	18	16	29	12	7	49	14	14	59	5	51	14	28	22	k__Bacteria;p__Bacteroidetes;c__Bacteroidia;o__Bacteroidales;f__Muribaculaceae;g__;s__
Otu000174	0	0	0	0	36	13	0	0	0	0	0	3	0	11	0	0	293	112	k__Bacteria;p__Tenericutes;c__Mollicutes;o__Mollicutes_RF39
Otu000175	43	54	12	1	215	1	51	1	5	0	0	2	3	9	0	20	34	17	k__Bacteria;p__Firmicutes;c__Clostridia;o__Clostridiales;f__Lachnospiraceae
Otu000176	38	20	25	41	22	26	23	103	1	33	6	18	11	11	49	14	13	13	k__Bacteria;p__Bacteroidetes;c__Bacteroidia;o__Bacteroidales;f__Rikenellaceae;g__Alistipes
Otu000177	37	54	1	24	11	11	17	5	3	22	16	8	29	51	24	84	46	12	k__Bacteria;p__Bacteroidetes;c__Bacteroidia;o__Bacteroidales;f__Muribaculaceae;g__;s__
Otu000178	34	2	0	0	10	55	52	1	0	0	0	0	40	0	0	90	59	108	k__Bacteria;p__Tenericutes;c__Mollicutes;o__Mollicutes_RF39;f__;g__;s__
Otu000179	29	13	0	0	24	25	129	1	0	0	0	19	13	0	0	0	26	168	k__Bacteria;p__Firmicutes;c__Clostridia;o__Clostridiales;f__Ruminococcaceae;g__Eubacterium_coprostanoligenes_group;s__
Otu000180	51	27	33	19	14	8	32	16	10	36	17	19	48	19	17	32	16	31	k__Bacteria;p__Bacteroidetes;c__Bacteroidia;o__Bacteroidales;f__Muribaculaceae;g__;s__
Otu000181	9	46	19	11	11	6	8	14	47	21	22	116	31	59	5	1	11	5	k__Bacteria;p__Firmicutes;c__Clostridia;o__Clostridiales;f__Lachnospiraceae;g__Lachnoclostridium;s__
Otu000182	23	44	0	0	31	15	22	0	0	13	45	32	118	41	11	19	6	15	k__Bacteria;p__Firmicutes;c__Clostridia;o__Clostridiales;f__Family_XIII;g__Family_XIII_AD3011_group;s__
Otu000183	159	23	0	0	0	0	0	0	0	0	3	0	0	13	3	98	125	2	k__Bacteria;p__Tenericutes;c__Mollicutes;o__Mollicutes_RF39;f__;g__;s__
Otu000184	0	9	5	15	25	28	11	13	0	6	11	22	72	132	46	8	8	9	k__Bacteria;p__Firmicutes;c__Clostridia;o__Clostridiales;f__Ruminococcaceae;g__Butyricicoccus;s__
Otu000185	62	6	19	6	7	200	2	4	0	8	0	10	3	0	0	52	0	33	k__Bacteria;p__Firmicutes;c__Clostridia;o__Clostridiales
Otu000186	15	15	54	19	5	11	32	1	0	46	13	10	43	33	31	51	9	23	k__Bacteria;p__Bacteroidetes;c__Bacteroidia;o__Bacteroidales;f__Muribaculaceae;g__;s__
Otu000187	19	7	20	23	15	35	27	10	44	19	16	13	31	13	31	13	34	37	k__Bacteria;p__Bacteroidetes;c__Bacteroidia;o__Bacteroidales;f__Muribaculaceae;g__;s__
Otu000188	6	11	214	1	51	0	7	3	4	5	27	12	12	20	3	9	20	1	k__Bacteria;p__Firmicutes;c__Clostridia;o__Clostridiales;f__Lachnospiraceae;g__;s__
Otu000189	13	37	19	8	12	18	18	15	101	34	68	12	31	5	4	1	1	1	k__Bacteria;p__Bacteroidetes;c__Bacteroidia;o__Bacteroidales;f__Bacteroidaceae;g__Bacteroides
Otu000190	11	11	37	35	5	29	28	7	0	44	16	11	54	19	23	29	18	18	k__Bacteria;p__Bacteroidetes;c__Bacteroidia;o__Bacteroidales;f__Muribaculaceae;g__;s__
Otu000191	1	18	0	2	64	81	3	0	0	0	0	6	53	4	0	0	1	160	k__Bacteria;p__Firmicutes;c__Clostridia;o__Clostridiales;f__Ruminococcaceae;g__Eubacterium_coprostanoligenes_group;s__
Otu000192	19	26	12	20	7	34	21	13	30	33	15	16	34	13	21	10	26	42	k__Bacteria;p__Bacteroidetes;c__Bacteroidia;o__Bacteroidales;f__Muribaculaceae;g__;s__
Otu000193	12	29	25	15	20	12	2	29	64	6	63	16	44	17	16	16	1	2	k__Bacteria;p__Firmicutes;c__Clostridia;o__Clostridiales;f__Ruminococcaceae;g__Ruminiclostridium_5;s__
Otu000194	4	8	20	10	216	8	2	22	26	0	6	17	11	1	15	18	2	0	k__Bacteria;p__Firmicutes;c__Clostridia;o__Clostridiales;f__Ruminococcaceae;g__Intestinimonas
Otu000195	1	9	7	16	13	4	11	69	55	4	49	7	71	36	1	20	1	3	k__Bacteria;p__Firmicutes;c__Clostridia;o__Clostridiales;f__Lachnospiraceae;g__;s__
Otu000196	35	34	24	1	38	24	22	0	0	18	5	32	40	23	10	18	23	29	k__Bacteria;p__Firmicutes;c__Clostridia;o__Clostridiales;f__Christensenellaceae;g__Christensenellaceae_R-7_group;s__
Otu000197	0	0	0	2	0	45	2	0	0	0	136	0	0	109	22	44	1	14	k__Bacteria;p__Firmicutes;c__Clostridia;o__Clostridiales;f__Lachnospiraceae;g__;s__
Otu000198	1	12	45	75	19	27	16	0	4	29	52	31	6	4	3	13	22	13	k__Bacteria;p__Firmicutes;c__Bacilli;o__Lactobacillales;f__Lactobacillaceae;g__Lactobacillus
Otu000199	2	0	5	0	90	16	3	96	0	0	2	8	11	54	1	49	32	3	k__Bacteria;p__Tenericutes;c__Mollicutes;o__Mollicutes_RF39;f__;g__;s__
Otu000200	43	20	0	61	14	9	0	0	0	10	0	0	32	12	101	4	48	16	k__Bacteria;p__Tenericutes;c__Mollicutes;o__Mollicutes_RF39;f__;g__;s__
Otu000201	10	4	30	33	95	40	6	8	14	1	24	24	13	9	43	4	3	2	k__Bacteria;p__Firmicutes;c__Clostridia;o__Clostridiales;f__Peptococcaceae;g__;s__
Otu000202	16	13	14	27	8	23	24	13	36	24	11	8	35	10	22	12	43	24	k__Bacteria;p__Bacteroidetes;c__Bacteroidia;o__Bacteroidales;f__Muribaculaceae
Otu000203	1	16	54	16	9	10	3	7	0	8	57	18	44	60	5	30	6	18	k__Bacteria;p__Firmicutes;c__Clostridia;o__Clostridiales;f__Ruminococcaceae
Otu000204	0	5	20	71	9	6	3	10	3	8	21	49	54	40	23	30	9	0	k__Bacteria;p__Firmicutes;c__Clostridia;o__Clostridiales;f__Lachnospiraceae;g__;s__
Otu000205	16	24	14	26	12	30	6	22	25	8	14	16	29	22	27	17	46	7	k__Bacteria;p__Bacteroidetes;c__Bacteroidia;o__Bacteroidales;f__Muribaculaceae;g__;s__
Otu000206	57	4	18	2	72	42	11	13	3	6	6	3	69	18	14	14	5	3	k__Bacteria;p__Firmicutes;c__Clostridia;o__Clostridiales;f__Ruminococcaceae;g__Oscillibacter;s__
Otu000207	5	2	68	19	54	4	3	22	15	4	16	14	19	3	29	78	4	0	k__Bacteria;p__Firmicutes;c__Clostridia;o__Clostridiales;f__Ruminococcaceae
Otu000208	15	42	7	19	9	13	12	7	14	19	10	15	15	48	12	58	21	16	k__Bacteria;p__Bacteroidetes;c__Bacteroidia;o__Bacteroidales;f__Muribaculaceae;g__;s__
Otu000209	39	10	7	1	39	8	36	3	2	9	48	35	25	32	2	4	21	31	k__Bacteria;p__Actinobacteria;c__Coriobacteriia;o__Coriobacteriales;f__Eggerthellaceae;g__Parvibacter;s__
Otu000210	14	7	2	3	138	35	31	0	0	0	0	10	11	8	23	1	24	40	k__Bacteria;p__Firmicutes;c__Clostridia;o__Clostridiales;f__Ruminococcaceae;g__Ruminococcaceae_UCG-009;s__
Otu000211	23	34	5	2	50	41	10	2	0	11	6	9	20	2	0	1	0	125	k__Bacteria;p__Firmicutes;c__Clostridia;o__Clostridiales;f__Defluviitaleaceae;g__Defluviitaleaceae_UCG-011;s__
Otu000212	139	35	0	0	38	19	36	0	0	0	0	5	31	15	0	0	0	22	k__Bacteria;p__Firmicutes;c__Clostridia;o__Clostridiales;f__Lachnospiraceae
Otu000213	4	159	0	0	12	80	0	0	0	0	0	0	13	5	0	65	0	0	k__Bacteria;p__Firmicutes;c__Clostridia;o__Clostridiales;f__Lachnospiraceae;g__Roseburia;s__Eubacterium_sp_14-2
Otu000214	35	183	9	0	0	0	1	0	84	0	0	7	14	0	0	5	0	0	k__Bacteria;p__Firmicutes;c__Clostridia;o__Clostridiales;f__Clostridiaceae_1;g__Candidatus_Arthromitus
Otu000215	4	0	13	17	52	98	5	13	1	6	6	7	27	10	72	4	3	0	k__Bacteria;p__Firmicutes;c__Clostridia;o__Clostridiales;f__Lachnospiraceae
Otu000216	0	7	0	0	173	20	1	0	0	0	0	11	25	0	31	0	7	63	k__Bacteria;p__Firmicutes;c__Clostridia;o__Clostridiales;f__Family_XIII;g__Eubacterium_nodatum_group;s__
Otu000217	2	205	1	0	30	6	0	76	3	0	0	0	0	14	0	0	0	0	k__Bacteria;p__Firmicutes;c__Clostridia;o__Clostridiales;f__Lachnospiraceae;g__Lachnospiraceae_NK4A136_group;s__
Otu000218	13	19	13	42	15	4	12	9	4	48	12	9	58	63	3	2	6	5	k__Bacteria;p__Firmicutes;c__Clostridia;o__Clostridiales;f__Lachnospiraceae;g__Marvinbryantia;s__
Otu000219	3	12	1	0	35	1	1	12	19	0	6	10	0	57	3	62	50	63	k__Bacteria;p__Tenericutes;c__Mollicutes;o__Mollicutes_RF39;f__;g__;s__
Otu000220	0	4	1	0	2	34	0	198	1	0	4	18	0	39	0	12	20	0	k__Bacteria;p__Tenericutes;c__Mollicutes;o__Mollicutes_RF39;f__;g__;s__
Otu000221	4	13	0	4	9	3	6	10	86	0	19	6	10	71	13	19	47	7	k__Bacteria;p__Firmicutes;c__Clostridia;o__Clostridiales;f__Lachnospiraceae;g__Roseburia;s__
Otu000222	12	22	0	0	0	6	32	182	0	0	0	15	0	4	43	0	11	0	k__Bacteria;p__Firmicutes;c__Clostridia;o__Clostridiales;f__Ruminococcaceae
Otu000223	22	0	5	42	0	1	54	22	4	1	16	64	62	6	18	6	1	1	k__Bacteria;p__Firmicutes;c__Clostridia;o__Clostridiales;f__Lachnospiraceae;g__;s__
Otu000224	20	12	17	10	8	33	21	11	20	25	9	6	46	3	29	5	26	21	k__Bacteria;p__Bacteroidetes;c__Bacteroidia;o__Bacteroidales;f__Muribaculaceae;g__;s__
Otu000225	0	0	0	0	319	0	0	0	0	0	0	0	0	0	0	0	0	0	k__Bacteria;p__Firmicutes;c__Clostridia;o__Clostridiales;f__Ruminococcaceae;g__Ruminococcus_1;s__
Otu000226	0	25	0	15	21	1	1	0	2	0	0	0	84	85	1	8	75	0	k__Bacteria;p__Firmicutes;c__Erysipelotrichia;o__Erysipelotrichales;f__Erysipelotrichaceae;g__;s__
Otu000227	8	4	14	23	67	6	1	21	15	6	19	2	27	33	16	56	0	0	k__Bacteria;p__Firmicutes;c__Clostridia;o__Clostridiales;f__Lachnospiraceae;g__;s__
Otu000228	0	0	0	0	70	1	1	39	8	0	0	39	16	88	0	37	8	0	k__Bacteria;p__Firmicutes;c__Clostridia;o__Clostridiales;f__Ruminococcaceae;g__Ruminococcaceae_UCG-014;s__
Otu000229	6	14	22	32	8	38	17	0	0	40	5	9	30	11	18	15	18	23	k__Bacteria;p__Bacteroidetes;c__Bacteroidia;o__Bacteroidales;f__Muribaculaceae;g__;s__
Otu000230	17	1	71	8	32	0	6	43	39	48	2	7	0	2	7	0	15	3	k__Bacteria;p__Cyanobacteria;c__Melainabacteria;o__Gastranaerophilales;f__;g__;s__
Otu000231	2	4	30	32	100	16	0	24	0	6	22	33	3	10	12	3	3	0	k__Bacteria;p__Firmicutes;c__Clostridia;o__Clostridiales;f__Ruminococcaceae
Otu000232	2	9	12	10	8	1	19	45	14	6	30	12	24	48	37	11	6	1	k__Bacteria;p__Firmicutes;c__Clostridia;o__Clostridiales;f__Ruminococcaceae
Otu000233	10	18	23	24	2	25	22	7	0	24	7	9	38	14	18	20	20	13	k__Bacteria;p__Bacteroidetes;c__Bacteroidia;o__Bacteroidales;f__Muribaculaceae;g__;s__
Otu000234	19	23	0	16	7	16	19	8	2	41	7	7	26	7	32	12	31	19	k__Bacteria;p__Bacteroidetes;c__Bacteroidia;o__Bacteroidales
Otu000235	10	10	10	14	7	17	26	7	28	19	14	10	19	6	20	5	36	27	k__Bacteria;p__Bacteroidetes;c__Bacteroidia;o__Bacteroidales;f__Muribaculaceae;g__;s__
Otu000236	23	11	3	10	35	33	1	5	10	4	19	15	19	45	0	46	6	0	k__Bacteria;p__Firmicutes;c__Clostridia;o__Clostridiales;f__Lachnospiraceae;g__Lachnospiraceae_NK4A136_group;s__
Otu000237	10	105	15	0	21	14	7	19	0	0	26	0	2	44	19	0	3	0	k__Bacteria;p__Firmicutes;c__Clostridia;o__Clostridiales;f__Lachnospiraceae;g__Eubacterium_xylanophilum_group;s__
Otu000238	3	25	7	6	0	19	0	114	5	6	17	65	2	2	0	9	2	0	k__Bacteria;p__Firmicutes;c__Clostridia;o__Clostridiales;f__Clostridiales_vadinBB60_group;g__;s__
Otu000239	10	14	12	2	8	10	7	7	54	23	65	6	24	11	2	5	5	17	k__Bacteria;p__Acidobacteria;c__Subgroup_6;o__;f__;g__;s__
Otu000240	8	16	8	22	10	31	9	6	9	18	15	8	20	13	29	5	36	18	k__Bacteria;p__Bacteroidetes;c__Bacteroidia;o__Bacteroidales;f__Muribaculaceae;g__;s__
Otu000241	8	13	13	19	8	21	25	10	19	25	7	9	18	3	16	3	32	28	k__Bacteria;p__Bacteroidetes;c__Bacteroidia;o__Bacteroidales;f__Muribaculaceae;g__;s__
Otu000242	0	0	140	2	3	3	6	26	1	0	17	33	22	11	4	3	4	0	k__Bacteria;p__Firmicutes;c__Clostridia;o__Clostridiales;f__Lachnospiraceae
Otu000243	0	0	6	0	7	4	33	18	0	0	7	17	0	110	3	53	16	0	k__Bacteria;p__Firmicutes;c__Clostridia;o__Clostridiales;f__Ruminococcaceae;g__Ruminococcaceae_UCG-014;s__
Otu000244	0	0	0	0	46	3	0	0	0	0	2	0	204	0	6	0	0	11	k__Bacteria;p__Firmicutes;c__Erysipelotrichia;o__Erysipelotrichales;f__Erysipelotrichaceae;g__Candidatus_Stoquefichus;s__
Otu000245	0	0	5	0	2	27	0	0	0	7	71	18	1	135	5	0	0	0	k__Bacteria;p__Firmicutes;c__Clostridia;o__Clostridiales;f__Ruminococcaceae;g__Ruminococcaceae_UCG-014;s__
Otu000246	1	6	149	7	2	0	4	1	1	0	4	37	13	9	8	15	3	3	k__Bacteria;p__Firmicutes;c__Clostridia;o__Clostridiales;f__Lachnospiraceae
Otu000247	26	17	2	18	13	17	7	6	1	31	8	11	25	6	12	11	38	13	k__Bacteria;p__Bacteroidetes;c__Bacteroidia;o__Bacteroidales;f__Muribaculaceae;g__;s__
Otu000248	4	8	9	20	24	2	3	17	47	2	20	4	55	13	25	2	0	5	k__Bacteria;p__Firmicutes;c__Clostridia;o__Clostridiales;f__Lachnospiraceae;g__Tyzzerella;s__
Otu000249	6	14	6	1	5	4	7	13	57	15	60	10	18	10	0	8	12	13	k__Bacteria;p__Proteobacteria;c__Gammaproteobacteria;o__Betaproteobacteriales;f__Burkholderiaceae
Otu000250	14	23	5	2	4	8	14	10	67	17	38	12	16	8	0	9	4	7	k__Bacteria;p__Proteobacteria;c__Gammaproteobacteria;o__Betaproteobacteriales;f__Burkholderiaceae
Otu000251	8	17	9	6	6	8	14	10	67	30	26	23	25	3	0	0	1	5	k__Bacteria;p__Acidobacteria;c__Subgroup_6;o__;f__;g__;s__
Otu000252	9	14	12	12	13	16	13	8	21	20	5	13	22	4	19	3	29	23	k__Bacteria;p__Bacteroidetes;c__Bacteroidia;o__Bacteroidales
Otu000253	33	19	6	16	10	8	11	27	0	24	3	3	17	7	15	35	17	5	k__Bacteria;p__Bacteroidetes;c__Bacteroidia;o__Bacteroidales
Otu000254	4	8	11	6	9	46	4	4	9	16	17	3	29	14	6	51	14	3	k__Bacteria;p__Firmicutes;c__Clostridia;o__Clostridiales;f__Lachnospiraceae;g__Marvinbryantia;s__Clostridiales_bacterium_CIEAF_012
Otu000255	1	22	21	2	34	34	3	11	14	1	23	15	36	10	5	13	5	3	k__Bacteria;p__Firmicutes;c__Clostridia;o__Clostridiales;f__Ruminococcaceae;g__Oscillospira;s__
Otu000256	31	2	32	2	10	14	13	5	0	13	26	21	1	17	6	8	17	32	k__Bacteria;p__Firmicutes;c__Clostridia;o__Clostridiales;f__Ruminococcaceae;g__Ruminococcaceae_UCG-010;s__
Otu000257	202	0	0	0	0	0	0	0	2	0	18	8	0	8	0	11	1	0	k__Bacteria;p__Firmicutes;c__Clostridia;o__Clostridiales;f__Lachnospiraceae;g__Lachnospiraceae_NK4A136_group
Otu000258	10	0	83	6	3	0	8	2	3	2	73	43	0	7	4	2	3	1	k__Bacteria;p__Firmicutes;c__Clostridia;o__Clostridiales;f__Lachnospiraceae
Otu000259	5	8	58	10	74	13	2	8	3	1	4	9	18	6	14	8	4	4	k__Bacteria;p__Firmicutes;c__Clostridia;o__Clostridiales;f__Ruminococcaceae;g__Oscillibacter;s__
Otu000260	8	11	8	13	9	26	17	5	15	21	9	5	22	3	24	4	22	27	k__Bacteria;p__Bacteroidetes;c__Bacteroidia;o__Bacteroidales;f__Muribaculaceae;g__;s__
Otu000261	18	17	32	19	4	1	7	4	0	20	11	11	35	15	16	34	1	4	k__Bacteria;p__Bacteroidetes;c__Bacteroidia;o__Bacteroidales;f__Muribaculaceae
Otu000262	0	25	21	6	8	0	3	0	2	23	50	33	4	2	1	38	25	7	k__Bacteria;p__Firmicutes;c__Erysipelotrichia;o__Erysipelotrichales;f__Erysipelotrichaceae;g__;s__
Otu000263	22	10	10	2	41	2	28	12	0	3	2	7	13	13	2	39	22	19	k__Bacteria;p__Tenericutes;c__Mollicutes;o__Mollicutes_RF39;f__;g__;s__
Otu000264	29	73	1	0	19	14	21	0	3	0	0	12	1	2	0	0	50	22	k__Bacteria;p__Tenericutes;c__Mollicutes;o__Izimaplasmatales;f__;g__;s__
Otu000265	0	1	1	0	0	0	50	1	0	0	155	2	14	0	0	0	0	23	k__Bacteria;p__Firmicutes;c__Clostridia;o__Clostridiales;f__Lachnospiraceae
Otu000266	10	9	27	7	3	13	11	1	0	22	17	14	16	27	11	43	2	13	k__Bacteria;p__Bacteroidetes;c__Bacteroidia;o__Bacteroidales;f__Muribaculaceae;g__;s__
Otu000267	33	20	8	2	0	9	5	6	8	5	63	0	7	48	5	5	19	1	k__Bacteria;p__Firmicutes;c__Clostridia;o__Clostridiales;f__Lachnospiraceae
Otu000268	13	10	1	15	5	2	6	2	3	41	15	4	22	13	30	14	32	15	k__Bacteria;p__Bacteroidetes;c__Bacteroidia;o__Bacteroidales;f__Muribaculaceae;g__;s__
Otu000269	10	5	2	37	19	22	1	27	11	4	33	4	5	8	23	22	10	0	k__Bacteria;p__Firmicutes;c__Clostridia;o__Clostridiales;f__Lachnospiraceae;g__;s__
Otu000270	21	13	1	21	22	10	7	22	2	11	17	18	5	20	10	22	10	9	k__Bacteria;p__Firmicutes;c__Clostridia;o__Clostridiales;f__Peptococcaceae;g__;s__
Otu000271	13	17	6	0	5	10	3	0	0	3	8	19	0	61	4	43	43	3	k__Bacteria;p__Firmicutes;c__Clostridia;o__Clostridiales;f__Ruminococcaceae;g__Ruminococcaceae_UCG-014;s__
Otu000272	6	9	89	18	6	0	0	0	17	10	3	4	27	5	33	4	3	3	k__Bacteria;p__Firmicutes;c__Clostridia;o__Clostridiales;f__Ruminococcaceae
Otu000273	7	85	1	0	7	3	0	0	2	0	2	0	0	11	0	0	1	116	k__Bacteria;p__Firmicutes;c__Clostridia;o__Clostridiales;f__Ruminococcaceae;g__Ruminococcaceae_UCG-014;s__
Otu000274	17	11	2	15	1	21	7	5	1	39	14	10	19	7	17	9	24	14	k__Bacteria;p__Bacteroidetes;c__Bacteroidia;o__Bacteroidales;f__Muribaculaceae;g__;s__
Otu000275	1	0	14	0	96	6	9	9	0	2	5	40	11	5	20	2	2	9	k__Bacteria;p__Firmicutes;c__Clostridia;o__Clostridiales;f__Lachnospiraceae
Otu000276	57	0	0	1	10	0	2	0	0	0	0	1	0	0	6	0	136	17	k__Bacteria;p__Tenericutes;c__Mollicutes;o__Mollicutes_RF39;f__;g__;s__
Otu000277	3	9	7	7	15	13	7	5	11	11	23	16	8	18	26	28	14	6	k__Bacteria;p__Firmicutes;c__Clostridia;o__Clostridiales;f__Lachnospiraceae
Otu000278	6	17	1	2	1	0	0	0	148	0	2	6	4	23	0	2	1	14	k__Bacteria;p__Firmicutes;c__Clostridia;o__Clostridiales;f__Lachnospiraceae;g__Lachnospiraceae_NK4A136_group
Otu000279	0	22	2	3	64	1	17	3	0	0	14	1	2	90	3	3	1	1	k__Bacteria;p__Firmicutes;c__Clostridia;o__Clostridiales;f__Ruminococcaceae;g__Ruminococcaceae_UCG-014;s__
Otu000280	1	3	5	12	6	11	10	0	1	12	11	42	1	21	11	66	10	3	k__Bacteria;p__Firmicutes;c__Clostridia;o__Clostridiales;f__Lachnospiraceae;g__;s__
Otu000281	42	16	8	7	28	0	3	106	0	6	1	4	2	0	0	0	2	0	k__Bacteria;p__Firmicutes;c__Clostridia;o__Clostridiales;f__Lachnospiraceae;g__Lachnospiraceae_NK4A136_group;s__
Otu000282	11	15	4	6	6	5	11	9	61	12	33	10	20	8	0	0	9	4	k__Bacteria;p__Proteobacteria;c__Gammaproteobacteria;o__CCD24;f__;g__;s__
Otu000283	0	11	33	0	20	23	48	2	0	0	0	10	40	1	2	3	19	12	k__Bacteria;p__Firmicutes;c__Clostridia;o__Clostridiales
Otu000284	17	13	12	3	8	8	11	11	53	17	40	6	20	1	0	0	0	0	k__Bacteria;p__Chloroflexi;c__Anaerolineae;o__Anaerolineales;f__Anaerolineaceae;g__UTCFX1;s__
Otu000285	25	12	2	18	1	2	14	5	1	33	3	5	28	5	16	28	13	8	k__Bacteria;p__Bacteroidetes;c__Bacteroidia;o__Bacteroidales;f__Muribaculaceae
Otu000286	12	7	22	23	15	15	25	11	2	12	1	6	12	7	19	4	12	12	k__Bacteria;p__Bacteroidetes;c__Bacteroidia;o__Bacteroidales;f__Muribaculaceae
Otu000287	8	17	21	26	6	7	15	0	0	29	0	21	30	6	9	0	12	10	k__Bacteria;p__Firmicutes;c__Clostridia;o__Clostridiales
Otu000288	2	14	23	0	83	5	2	62	4	0	11	6	2	0	1	0	0	0	k__Bacteria;p__Firmicutes;c__Clostridia;o__Clostridiales;f__Lachnospiraceae;g__Lachnospiraceae_NK4A136_group;s__
Otu000289	0	10	65	0	37	6	3	6	0	0	23	0	3	24	28	7	0	0	k__Bacteria;p__Firmicutes;c__Clostridia;o__Clostridiales;f__Lachnospiraceae;g__Acetitomaculum;s__Firmicutes_bacterium_CAG_194_44_15
Otu000290	0	1	1	0	8	3	0	4	0	0	14	11	5	106	0	16	8	34	k__Bacteria;p__Tenericutes;c__Mollicutes;o__Mollicutes_RF39;f__;g__;s__
Otu000291	3	2	0	0	8	8	0	62	0	0	2	17	1	14	0	46	43	4	k__Bacteria;p__Tenericutes;c__Mollicutes;o__Mollicutes_RF39;f__;g__;s__
Otu000292	5	4	1	1	32	7	6	26	9	8	46	14	3	27	1	10	6	3	k__Bacteria;p__Firmicutes;c__Clostridia;o__Clostridiales;f__Lachnospiraceae
Otu000293	0	0	0	0	0	208	0	0	0	0	0	0	0	0	0	0	0	0	k__Bacteria;p__Firmicutes;c__Clostridia;o__Clostridiales;f__Ruminococcaceae;g__Ruminococcus_1
Otu000294	31	3	19	5	6	7	10	4	7	12	11	10	21	12	12	23	8	5	k__Bacteria;p__Bacteroidetes;c__Bacteroidia;o__Bacteroidales;f__Muribaculaceae;g__;s__
Otu000295	0	16	1	1	59	18	1	1	16	1	9	0	41	36	0	0	6	0	k__Bacteria;p__Firmicutes;c__Clostridia;o__Clostridiales;f__Lachnospiraceae;g__Roseburia
Otu000296	0	78	2	0	0	13	0	20	0	0	0	38	19	11	1	0	4	18	k__Bacteria;p__Tenericutes;c__Mollicutes;o__Mollicutes_RF39;f__;g__;s__
Otu000297	0	0	1	0	84	0	0	0	0	0	0	0	0	20	0	0	98	0	k__Bacteria;p__Firmicutes;c__Clostridia;o__Clostridiales;f__Lachnospiraceae;g__Coprococcus_2;s__
Otu000298	1	4	4	1	56	3	0	0	27	0	5	1	18	45	25	4	5	3	k__Bacteria;p__Firmicutes;c__Clostridia;o__Clostridiales;f__Lachnospiraceae;g__;s__
Otu000299	7	4	10	1	16	4	6	49	2	2	35	18	4	35	1	6	0	0	k__Bacteria;p__Firmicutes;c__Clostridia;o__Clostridiales;f__Lachnospiraceae
Otu000300	16	6	93	7	6	9	0	7	8	1	8	6	0	9	3	17	4	0	k__Bacteria;p__Firmicutes;c__Clostridia;o__Clostridiales;f__Ruminococcaceae;g__Ruminiclostridium_6;s__
Otu000301	7	6	7	0	11	11	4	39	0	0	0	0	3	46	0	50	3	12	k__Bacteria;p__Firmicutes;c__Clostridia;o__Clostridiales;f__Ruminococcaceae;g__Ruminococcaceae_UCG-014;s__
Otu000302	9	17	9	5	5	8	15	1	69	23	11	5	18	0	0	0	2	0	k__Bacteria;p__Proteobacteria;c__Alphaproteobacteria;o__;f__;g__;s__
Otu000303	10	15	0	0	24	46	6	1	0	1	0	16	24	23	3	12	0	13	k__Bacteria;p__Firmicutes;c__Clostridia;o__Clostridiales;f__Christensenellaceae;g__Christensenellaceae_R-7_group;s__
Otu000304	4	1	11	0	5	20	33	0	0	1	1	0	36	15	40	22	1	3	k__Bacteria;p__Firmicutes;c__Clostridia;o__Clostridiales;f__Ruminococcaceae;g__Ruminococcaceae_UCG-014;s__
Otu000305	9	10	2	0	4	5	22	0	3	1	0	0	1	1	0	0	52	82	k__Bacteria;p__Firmicutes;c__Erysipelotrichia;o__Erysipelotrichales;f__Erysipelotrichaceae;g__Faecalibaculum;s__
Otu000306	10	16	1	7	8	3	3	10	0	18	9	8	18	21	8	40	10	2	k__Bacteria;p__Bacteroidetes;c__Bacteroidia;o__Bacteroidales;f__Muribaculaceae;g__;s__
Otu000307	15	9	3	0	52	7	4	13	0	1	0	11	29	10	7	8	10	13	k__Bacteria;p__Firmicutes;c__Clostridia;o__Clostridiales;f__Christensenellaceae;g__Christensenellaceae_R-7_group;s__
Otu000308	26	0	2	0	24	1	2	1	0	0	6	92	0	6	1	3	4	20	k__Bacteria;p__Tenericutes;c__Mollicutes;o__Mollicutes_RF39;f__;g__;s__
Otu000309	5	8	25	12	4	3	5	0	0	23	9	7	17	19	7	25	11	7	k__Bacteria;p__Bacteroidetes;c__Bacteroidia;o__Bacteroidales;f__Muribaculaceae;g__;s__
Otu000310	0	5	0	2	0	34	0	0	0	0	1	0	126	0	0	0	18	0	k__Bacteria;p__Firmicutes;c__Clostridia;o__Clostridiales;f__Lachnospiraceae;g__Lachnospiraceae_UCG-001;s__
Otu000311	5	9	9	1	6	7	10	3	46	21	24	12	22	0	4	1	3	1	k__Bacteria;p__Tenericutes;c__Mollicutes;o__Mycoplasmatales;f__Mycoplasmataceae;g__Candidatus_Bacilloplasma;s__
Otu000312	3	1	6	4	3	0	6	2	1	5	9	116	10	8	5	2	2	1	k__Bacteria;p__Firmicutes;c__Clostridia;o__Clostridiales;f__Lachnospiraceae
Otu000313	0	7	9	13	48	14	4	5	0	10	4	23	13	4	20	7	2	0	k__Bacteria;p__Firmicutes;c__Clostridia;o__Clostridiales;f__Ruminococcaceae
Otu000314	2	7	8	10	15	0	5	5	1	11	3	7	68	15	7	3	6	8	k__Bacteria;p__Firmicutes;c__Clostridia;o__Clostridiales;f__Ruminococcaceae;g__Candidatus_Soleaferrea;s__Bittarella_massiliensis
Otu000315	7	8	8	11	38	2	4	0	5	5	25	8	25	12	9	13	0	1	k__Bacteria;p__Firmicutes;c__Clostridia;o__Clostridiales;f__Ruminococcaceae
Otu000316	0	0	2	12	82	0	2	4	14	4	1	49	0	5	0	3	0	2	k__Bacteria;p__Firmicutes;c__Clostridia;o__Clostridiales;f__Lachnospiraceae;g__Lachnospiraceae_NK4A136_group
Otu000317	25	4	7	0	0	8	0	7	1	0	13	24	0	16	1	50	22	1	k__Bacteria;p__Tenericutes;c__Mollicutes;o__Mollicutes_RF39;f__;g__;s__
Otu000318	7	17	4	1	3	7	4	4	60	17	27	2	23	3	0	0	0	0	k__Bacteria;p__Proteobacteria;c__Gammaproteobacteria;o__Xanthomonadales;f__Xanthomonadaceae;g__Luteimonas
Otu000319	10	1	27	5	16	10	4	2	24	3	36	7	8	15	7	0	0	3	k__Bacteria;p__Firmicutes;c__Clostridia;o__Clostridiales;f__Lachnospiraceae
Otu000320	14	4	13	6	7	15	15	5	9	15	5	0	24	2	13	0	19	12	k__Bacteria;p__Bacteroidetes;c__Bacteroidia;o__Bacteroidales;f__Muribaculaceae;g__;s__
Otu000321	8	7	8	13	3	15	14	0	14	22	4	4	13	4	14	2	17	14	k__Bacteria;p__Bacteroidetes;c__Bacteroidia;o__Bacteroidales;f__Muribaculaceae;g__;s__
Otu000322	6	6	6	10	5	18	12	3	10	14	10	6	15	4	10	4	21	16	k__Bacteria;p__Bacteroidetes;c__Bacteroidia;o__Bacteroidales;f__Muribaculaceae;g__;s__
Otu000323	24	14	8	6	8	3	13	0	0	4	1	25	13	8	2	12	20	14	k__Bacteria;p__Firmicutes;c__Clostridia;o__Clostridiales;f__Christensenellaceae;g__Christensenellaceae_R-7_group;s__
Otu000324	3	20	23	0	7	0	8	29	0	0	0	0	1	33	0	20	30	1	k__Bacteria;p__Firmicutes;c__Clostridia;o__Clostridiales;f__Ruminococcaceae;g__Ruminococcaceae_UCG-014;s__
Otu000325	1	0	84	0	0	0	86	0	0	0	0	0	1	0	0	0	0	3	k__Bacteria;p__Firmicutes;c__Clostridia;o__Clostridiales;f__Lachnospiraceae;g__Eubacterium_ruminantium_group;s__
Otu000326	0	2	0	0	14	0	0	1	0	0	0	0	8	137	0	9	0	2	k__Bacteria;p__Firmicutes;c__Clostridia;o__Clostridiales;f__Ruminococcaceae;g__Ruminococcaceae_UCG-014;s__
Otu000327	0	3	18	3	24	7	5	2	14	1	3	5	17	28	12	31	0	0	k__Bacteria;p__Firmicutes;c__Clostridia;o__Clostridiales;f__Lachnospiraceae;g__Lachnospiraceae_NK4A136_group;s__
Otu000328	18	12	7	1	5	6	9	12	40	12	21	12	18	0	0	0	0	0	k__Bacteria;p__Deinococcus-Thermus;c__Deinococci;o__Deinococcales;f__Trueperaceae;g__Truepera;s__
Otu000329	5	8	9	16	5	21	4	7	7	9	6	9	13	8	17	7	17	4	k__Bacteria;p__Bacteroidetes;c__Bacteroidia;o__Bacteroidales;f__Muribaculaceae;g__;s__
Otu000330	0	1	13	0	0	0	1	62	0	0	2	0	49	2	0	2	40	0	k__Bacteria;p__Firmicutes;c__Clostridia;o__Clostridiales;f__Ruminococcaceae;g__Ruminococcaceae_UCG-014;s__
Otu000331	11	8	10	13	4	20	8	6	15	12	2	6	11	4	10	5	7	18	k__Bacteria;p__Bacteroidetes;c__Bacteroidia;o__Bacteroidales;f__Muribaculaceae;g__;s__
Otu000332	9	16	10	2	0	6	16	11	57	13	16	7	6	1	0	0	0	0	k__Bacteria;p__Bacteroidetes;c__Bacteroidia;o__Cytophagales;f__Microscillaceae;g__;s__
Otu000333	0	6	0	0	8	0	0	0	0	0	0	0	0	68	0	88	0	0	k__Bacteria;p__Tenericutes;c__Mollicutes;o__Mollicutes_RF39;f__;g__;s__
Otu000334	5	4	16	0	7	7	5	5	47	19	17	10	6	9	1	5	3	2	k__Bacteria;p__Proteobacteria;c__Gammaproteobacteria;o__Xanthomonadales;f__Xanthomonadaceae;g__Thermomonas;s__
Otu000335	6	0	2	0	61	8	2	51	0	6	0	2	4	0	1	0	3	22	k__Bacteria;p__Firmicutes;c__Clostridia;o__Clostridiales;f__Ruminococcaceae;g__Papillibacter;s__
Otu000336	1	19	2	3	4	6	5	17	3	0	63	4	20	3	0	9	5	3	k__Bacteria;p__Firmicutes;c__Clostridia;o__Clostridiales;f__Clostridiales_vadinBB60_group;g__;s__
Otu000337	22	5	2	5	6	5	7	4	1	32	9	2	26	3	11	12	7	8	k__Bacteria;p__Bacteroidetes;c__Bacteroidia;o__Bacteroidales;f__Muribaculaceae
Otu000338	20	2	7	25	31	0	6	2	0	7	13	17	29	0	0	0	1	7	k__Bacteria;p__Firmicutes;c__Clostridia;o__Clostridiales;f__Lachnospiraceae;g__;s__
Otu000339	19	7	2	2	2	1	2	9	0	14	19	5	20	20	8	14	15	7	k__Bacteria;p__Bacteroidetes;c__Bacteroidia;o__Bacteroidales;f__Muribaculaceae;g__;s__
Otu000340	16	25	9	6	10	3	1	4	0	4	15	13	6	14	8	19	12	1	k__Bacteria;p__Firmicutes;c__Clostridia;o__Clostridiales;f__Ruminococcaceae;g__Ruminococcaceae_UCG-013;s__
Otu000341	8	4	7	6	5	17	19	7	13	9	7	4	19	0	9	2	18	10	k__Bacteria;p__Bacteroidetes;c__Bacteroidia;o__Bacteroidales;f__Muribaculaceae;g__;s__
Otu000342	7	22	4	9	9	9	3	3	4	8	6	6	2	13	7	28	17	7	k__Bacteria;p__Bacteroidetes;c__Bacteroidia;o__Bacteroidales;f__Muribaculaceae;g__;s__
Otu000343	13	6	6	7	8	3	9	5	1	5	21	10	7	11	6	12	10	23	k__Bacteria;p__Firmicutes;c__Clostridia;o__Clostridiales;f__Ruminococcaceae
Otu000344	14	2	43	3	15	5	35	0	0	0	0	4	12	0	2	0	3	24	k__Bacteria;p__Firmicutes;c__Clostridia;o__Clostridiales;f__Christensenellaceae;g__Christensenellaceae_R-7_group
Otu000345	11	9	3	11	5	4	9	5	2	20	4	2	16	5	18	6	19	10	k__Bacteria;p__Bacteroidetes;c__Bacteroidia;o__Bacteroidales;f__Muribaculaceae;g__;s__
Otu000346	1	1	14	14	77	2	1	0	15	1	2	7	10	4	6	4	0	0	k__Bacteria;p__Firmicutes;c__Clostridia;o__Clostridiales;f__Ruminococcaceae
Otu000347	11	7	9	4	4	7	10	5	13	8	7	7	17	2	13	4	18	12	k__Bacteria;p__Bacteroidetes;c__Bacteroidia;o__Bacteroidales;f__Muribaculaceae;g__;s__
Otu000348	0	2	31	9	16	1	0	0	0	20	5	5	3	35	1	28	0	0	k__Bacteria;p__Firmicutes;c__Clostridia;o__Clostridiales;f__Lachnospiraceae;g__Lachnospiraceae_NK4A136_group;s__
Otu000349	6	1	9	17	23	24	2	1	6	1	16	7	0	20	12	3	3	4	k__Bacteria;p__Firmicutes;c__Clostridia;o__Clostridiales;f__Lachnospiraceae;g__;s__
Otu000350	0	12	0	0	0	0	0	15	120	0	0	0	3	4	0	1	0	0	k__Bacteria;p__Firmicutes;c__Clostridia;o__Clostridiales;f__Lachnospiraceae;g__Acetatifactor;s__
Otu000351	18	19	0	0	29	16	0	23	0	0	1	0	6	3	0	1	33	5	k__Bacteria;p__Firmicutes;c__Clostridia;o__Clostridiales;f__Ruminococcaceae;g__Ruminococcaceae_UCG-010;s__
Otu000352	0	0	0	3	16	2	0	55	0	0	5	0	0	6	38	17	12	0	k__Bacteria;p__Firmicutes;c__Clostridia;o__Clostridiales;f__Ruminococcaceae;g__Ruminococcaceae_UCG-014;s__
Otu000353	0	5	10	3	38	0	0	25	13	0	3	46	10	1	0	0	0	0	k__Bacteria;p__Firmicutes;c__Clostridia;o__Clostridiales;f__Ruminococcaceae;g__Ruminiclostridium_5;s__Ruminiclostridium_sp_KB18
Otu000354	3	10	7	9	3	11	4	0	0	8	3	8	8	15	3	51	2	8	k__Bacteria;p__Bacteroidetes;c__Bacteroidia;o__Bacteroidales;f__Muribaculaceae;g__;s__
Otu000355	12	6	6	4	2	12	12	5	15	6	3	6	12	5	12	1	23	11	k__Bacteria;p__Bacteroidetes;c__Bacteroidia;o__Bacteroidales;f__Muribaculaceae;g__;s__
Otu000356	0	0	0	0	1	0	0	63	85	0	0	0	0	2	0	0	0	0	k__Bacteria;p__Firmicutes;c__Clostridia;o__Clostridiales;f__Lachnospiraceae;g__Lachnospiraceae_NK4A136_group;s__
Otu000357	17	11	12	0	2	5	5	4	37	11	20	5	19	1	0	0	0	2	k__Bacteria;p__Proteobacteria;c__Gammaproteobacteria;o__Steroidobacterales;f__Steroidobacteraceae;g__;s__
Otu000358	0	1	6	0	105	6	1	3	0	0	0	5	8	1	9	3	0	3	k__Bacteria;p__Firmicutes;c__Clostridia;o__Clostridiales;f__Ruminococcaceae;g__Ruminococcaceae_UCG-009;s__
Otu000359	11	28	2	0	18	13	2	24	0	0	13	7	23	2	0	5	2	0	k__Bacteria;p__Tenericutes;c__Mollicutes;o__Anaeroplasmatales;f__Anaeroplasmataceae;g__Anaeroplasma;s__
Otu000360	0	38	0	0	13	0	0	6	0	0	0	0	1	8	0	1	83	0	k__Bacteria;p__Tenericutes;c__Mollicutes;o__Mollicutes_RF39;f__;g__;s__
Otu000361	8	9	1	3	4	6	6	0	1	13	13	3	15	11	11	25	9	12	k__Bacteria;p__Bacteroidetes;c__Bacteroidia;o__Bacteroidales;f__Muribaculaceae;g__;s__
Otu000362	0	0	5	2	12	5	0	0	42	51	0	12	0	0	0	3	0	18	k__Bacteria;p__Proteobacteria;c__Alphaproteobacteria
Otu000363	10	18	3	15	1	3	2	0	1	4	16	6	7	11	16	22	7	7	k__Bacteria;p__Bacteroidetes;c__Bacteroidia;o__Bacteroidales;f__Muribaculaceae;g__;s__
Otu000364	9	6	23	9	0	2	9	2	0	22	8	1	16	2	7	22	4	7	k__Bacteria;p__Bacteroidetes;c__Bacteroidia;o__Bacteroidales;f__Muribaculaceae;g__;s__
Otu000365	0	0	0	0	0	0	0	0	0	0	0	0	0	0	0	149	0	0	k__Bacteria;p__Firmicutes;c__Clostridia;o__Clostridiales;f__Ruminococcaceae;g__Ruminococcus_1
Otu000366	9	9	10	1	9	12	20	2	0	19	0	8	15	1	7	1	3	22	k__Bacteria;p__Firmicutes;c__Clostridia;o__DTU014;f__;g__;s__
Otu000367	12	7	5	11	38	9	3	1	0	13	5	3	5	8	15	5	7	0	k__Bacteria;p__Firmicutes;c__Clostridia;o__Clostridiales;f__Lachnospiraceae
Otu000368	6	6	6	4	2	4	2	0	35	13	27	6	16	8	0	1	3	6	k__Bacteria;p__Proteobacteria;c__Gammaproteobacteria;o__Betaproteobacteriales;f__Burkholderiaceae
Otu000369	0	0	0	0	6	0	0	0	0	0	0	0	0	139	0	0	0	0	k__Bacteria;p__Firmicutes;c__Clostridia;o__Clostridiales;f__Lachnospiraceae;g__Lachnospiraceae_NK4A136_group;s__
Otu000370	9	6	4	1	0	5	5	12	32	11	18	9	15	5	0	3	4	4	k__Bacteria;p__Proteobacteria;c__Gammaproteobacteria;o__Enterobacteriales;f__Enterobacteriaceae
Otu000371	0	81	8	0	9	0	0	1	1	1	5	3	20	8	0	2	1	2	k__Bacteria;p__Firmicutes;c__Clostridia;o__Clostridiales;f__Lachnospiraceae
Otu000372	0	0	0	0	47	0	5	1	0	0	0	0	0	87	0	0	2	0	k__Bacteria;p__Firmicutes;c__Clostridia;o__Clostridiales;f__Ruminococcaceae;g__Ruminococcaceae_UCG-014;s__
Otu000373	3	2	2	5	4	11	6	4	22	11	28	3	4	4	7	10	5	8	k__Bacteria;p__Proteobacteria;c__Gammaproteobacteria;o__PLTA13;f__;g__;s__
Otu000374	8	6	6	0	4	3	5	2	27	8	22	7	9	15	2	5	4	4	k__Bacteria;p__Firmicutes;c__Bacilli;o__Bacillales;f__Bacillaceae;g__Bacillus
Otu000375	10	0	0	0	16	8	28	2	0	0	0	0	4	17	4	0	0	47	k__Bacteria;p__Firmicutes;c__Clostridia;o__Clostridiales;f__Ruminococcaceae;g__Ruminococcaceae_UCG-010;s__
Otu000376	5	0	0	0	0	0	3	8	0	0	2	0	21	0	0	94	0	3	k__Bacteria;p__Firmicutes;c__Clostridia;o__Clostridiales
Otu000377	3	4	0	0	24	0	0	0	36	4	0	25	2	20	1	10	0	4	k__Bacteria;p__Firmicutes;c__Clostridia;o__Clostridiales;f__Ruminococcaceae;g__Ruminiclostridium_6;s__
Otu000378	0	0	0	0	0	0	0	2	0	0	0	0	0	0	0	131	0	0	k__Bacteria;p__Tenericutes;c__Mollicutes;o__Mollicutes_RF39;f__;g__;s__
Otu000379	3	8	4	5	3	10	9	2	12	17	2	5	10	3	6	8	12	14	k__Bacteria;p__Bacteroidetes;c__Bacteroidia;o__Bacteroidales;f__Muribaculaceae
Otu000380	0	0	0	0	45	0	0	0	0	0	28	0	0	15	42	0	0	3	k__Bacteria;p__Tenericutes;c__Mollicutes;o__Mollicutes_RF39;f__;g__;s__
Otu000381	7	8	0	3	3	3	4	1	0	19	4	11	13	10	13	17	9	7	k__Bacteria;p__Bacteroidetes;c__Bacteroidia;o__Bacteroidales;f__Muribaculaceae;g__;s__
Otu000382	0	0	8	0	70	0	1	2	4	0	0	0	5	25	5	5	0	6	k__Bacteria;p__Firmicutes;c__Clostridia;o__Clostridiales;f__Lachnospiraceae;g__Roseburia;s__Clostridium_sp_Clone-44
Otu000383	1	6	59	12	10	1	5	1	1	2	1	6	8	2	7	2	3	4	k__Bacteria;p__Firmicutes;c__Clostridia;o__Clostridiales
Otu000384	1	8	17	13	7	16	1	0	4	8	17	10	3	3	3	10	7	1	k__Bacteria;p__Firmicutes;c__Bacilli;o__Lactobacillales;f__Lactobacillaceae;g__Lactobacillus
Otu000385	0	0	0	0	16	0	2	0	1	0	0	0	6	98	0	6	0	0	k__Bacteria;p__Firmicutes;c__Clostridia;o__Clostridiales;f__Lachnospiraceae
Otu000386	0	22	36	0	0	0	0	0	0	0	1	32	0	0	0	17	13	8	k__Bacteria;p__Firmicutes;c__Erysipelotrichia;o__Erysipelotrichales;f__Erysipelotrichaceae
Otu000387	0	3	34	1	20	3	1	12	15	5	1	11	12	3	1	1	4	2	k__Bacteria;p__Firmicutes;c__Clostridia;o__Clostridiales;f__Ruminococcaceae;g__Harryflintia;s__
Otu000388	3	10	3	8	1	25	3	5	12	5	7	0	5	3	7	7	21	4	k__Bacteria;p__Bacteroidetes;c__Bacteroidia;o__Bacteroidales;f__Muribaculaceae;g__;s__
Otu000389	0	0	0	0	96	0	0	0	30	0	0	0	1	0	0	0	1	0	k__Bacteria;p__Firmicutes;c__Clostridia;o__Clostridiales;f__Lachnospiraceae;g__Roseburia
Otu000390	0	0	2	0	9	4	0	96	0	0	0	9	3	3	0	0	1	1	k__Bacteria;p__Firmicutes;c__Clostridia;o__Clostridiales;f__Ruminococcaceae;g__Ruminococcaceae_UCG-014;s__
Otu000391	2	6	5	17	3	10	7	2	6	11	2	4	14	4	14	1	11	9	k__Bacteria;p__Bacteroidetes;c__Bacteroidia;o__Bacteroidales;f__Muribaculaceae;g__;s__
Otu000392	41	11	3	0	6	9	6	0	0	0	0	5	2	19	4	8	7	7	k__Bacteria;p__Firmicutes;c__Clostridia;o__Clostridiales;f__Ruminococcaceae
Otu000393	85	2	3	1	1	9	0	2	1	0	13	0	1	0	6	0	4	0	k__Bacteria;p__Firmicutes;c__Clostridia;o__Clostridiales;f__Lachnospiraceae
Otu000394	16	5	1	8	3	8	3	4	0	24	8	2	10	3	6	6	16	5	k__Bacteria;p__Bacteroidetes;c__Bacteroidia;o__Bacteroidales;f__Muribaculaceae;g__;s__
Otu000395	33	2	22	8	1	2	6	15	0	7	2	5	5	0	11	2	2	5	k__Bacteria;p__Bacteroidetes;c__Bacteroidia;o__Bacteroidales
Otu000396	0	2	0	2	43	0	0	2	2	0	0	0	2	75	0	0	0	0	k__Bacteria;p__Firmicutes;c__Clostridia;o__Clostridiales;f__Lachnospiraceae;g__Roseburia;s__
Otu000397	9	11	17	3	14	2	3	7	5	2	11	11	6	1	3	0	6	16	k__Bacteria;p__Firmicutes;c__Clostridia;o__Clostridiales;f__Lachnospiraceae
Otu000398	6	11	5	10	6	10	4	2	7	6	4	4	13	1	9	1	19	9	k__Bacteria;p__Bacteroidetes;c__Bacteroidia;o__Bacteroidales;f__Muribaculaceae;g__;s__
Otu000399	2	12	1	5	3	3	5	7	40	10	16	8	8	3	0	1	3	0	k__Bacteria;p__Acidobacteria;c__Blastocatellia_Subgroup_4;o__Pyrinomonadales;f__Pyrinomonadaceae;g__RB41;s__
Otu000400	15	62	0	2	0	0	8	12	3	0	1	0	9	0	3	0	3	9	k__Bacteria;p__Firmicutes;c__Clostridia;o__Clostridiales;f__Lachnospiraceae;g__;s__
Otu000401	1	21	4	1	15	14	2	12	0	3	5	16	7	2	11	4	1	7	k__Bacteria;p__Firmicutes;c__Clostridia;o__Clostridiales;f__Ruminococcaceae
Otu000402	2	7	12	1	61	4	1	1	0	0	21	1	0	9	5	0	1	0	k__Bacteria;p__Firmicutes;c__Clostridia;o__Clostridiales;f__Lachnospiraceae
Otu000403	3	9	11	9	2	6	4	3	0	5	4	9	12	17	3	19	5	4	k__Bacteria;p__Bacteroidetes;c__Bacteroidia;o__Bacteroidales;f__Muribaculaceae;g__;s__
Otu000404	11	6	0	2	6	6	9	5	11	11	5	1	13	3	9	2	7	18	k__Bacteria;p__Bacteroidetes;c__Bacteroidia;o__Bacteroidales;f__Muribaculaceae;g__;s__
Otu000405	9	6	5	4	4	2	8	1	31	16	18	7	9	2	0	2	0	0	k__Bacteria;p__Actinobacteria;c__Acidimicrobiia;o__Microtrichales;f__Iamiaceae;g__Iamia;s__
Otu000406	0	0	3	3	10	5	3	44	1	3	0	0	37	7	3	1	3	0	k__Bacteria;p__Firmicutes;c__Clostridia;o__Clostridiales;f__Ruminococcaceae
Otu000407	8	8	6	3	2	7	3	3	36	4	15	9	8	2	0	1	6	2	k__Bacteria;p__Proteobacteria;c__Gammaproteobacteria;o__Steroidobacterales;f__Steroidobacteraceae;g__Steroidobacter;s__
Otu000408	16	37	0	0	1	9	0	13	10	0	0	0	4	31	1	0	0	0	k__Bacteria;p__Firmicutes;c__Clostridia;o__Clostridiales;f__Lachnospiraceae;g__Roseburia
Otu000409	15	5	2	5	4	8	2	0	0	18	5	1	17	2	10	4	12	12	k__Bacteria;p__Bacteroidetes;c__Bacteroidia;o__Bacteroidales;f__Muribaculaceae;g__;s__
Otu000410	8	27	8	6	22	2	1	0	0	5	6	14	0	1	0	0	11	10	k__Bacteria;p__Firmicutes;c__Clostridia;o__Clostridiales;f__Ruminococcaceae;g__;s__
Otu000411	0	4	60	1	0	0	26	7	0	2	13	0	0	0	0	0	4	4	k__Bacteria;p__Firmicutes;c__Clostridia;o__Clostridiales;f__Ruminococcaceae;g__Ruminococcaceae_UCG-014;s__
Otu000412	3	5	6	6	3	5	8	2	33	6	20	10	13	1	0	0	0	0	k__Bacteria;p__Actinobacteria;c__Actinobacteria;o__Propionibacteriales;f__Nocardioidaceae;g__Marmoricola;s__
Otu000413	4	4	2	4	6	7	6	4	10	8	9	2	15	3	8	0	14	14	k__Bacteria;p__Bacteroidetes;c__Bacteroidia;o__Bacteroidales;f__Muribaculaceae;g__;s__
Otu000414	3	2	4	14	27	10	2	1	4	3	5	12	12	7	9	0	1	2	k__Bacteria;p__Firmicutes;c__Clostridia;o__Clostridiales;f__Lachnospiraceae
Otu000415	14	4	10	12	2	4	0	4	0	2	4	2	7	9	8	20	8	6	k__Bacteria;p__Bacteroidetes;c__Bacteroidia;o__Bacteroidales;f__Muribaculaceae;g__;s__
Otu000416	27	4	2	0	17	6	13	2	0	3	0	5	3	3	1	0	12	18	k__Bacteria;p__Firmicutes;c__Clostridia;o__Clostridiales;f__Ruminococcaceae;g__Ruminococcaceae_UCG-010;s__
Otu000417	4	5	2	23	11	8	1	5	0	19	0	1	22	0	6	1	3	3	k__Bacteria;p__Firmicutes;c__Clostridia;o__Clostridiales;f__Ruminococcaceae;g__Ruminiclostridium;s__Clostridium_methylpentosum_DSM_5476
Otu000418	5	9	8	6	6	3	6	0	0	9	4	7	5	11	5	12	7	10	k__Bacteria;p__Bacteroidetes;c__Bacteroidia;o__Bacteroidales;f__Muribaculaceae;g__;s__
Otu000419	14	3	15	7	5	2	3	6	3	7	6	5	8	5	10	3	4	7	k__Bacteria;p__Bacteroidetes;c__Bacteroidia;o__Bacteroidales;f__Muribaculaceae;g__;s__
Otu000420	61	3	0	0	22	1	0	1	0	0	0	0	15	0	0	1	4	5	k__Bacteria;p__Firmicutes;c__Clostridia;o__Clostridiales
Otu000421	13	12	6	6	5	1	9	1	0	11	1	10	5	1	2	10	6	13	k__Bacteria;p__Firmicutes;c__Clostridia;o__Clostridiales;f__Ruminococcaceae
Otu000422	4	4	6	4	6	5	11	5	12	8	6	1	15	1	9	3	7	5	k__Bacteria;p__Bacteroidetes;c__Bacteroidia;o__Bacteroidales;f__Muribaculaceae;g__;s__
Otu000423	9	4	12	8	6	8	5	1	1	12	0	3	14	1	11	1	7	9	k__Bacteria;p__Bacteroidetes;c__Bacteroidia;o__Bacteroidales;f__Muribaculaceae;g__;s__
Otu000424	8	6	1	1	3	3	4	3	32	7	19	9	14	1	0	0	0	0	k__Bacteria;p__Chloroflexi;c__Gitt-GS-136;o__;f__;g__;s__
Otu000425	6	1	11	0	17	0	6	5	1	10	0	12	24	1	12	2	0	3	k__Bacteria;p__Firmicutes;c__Clostridia;o__Clostridiales;f__Ruminococcaceae;g__Ruminococcaceae_UCG-009;s__
Otu000426	3	4	2	1	4	2	2	4	21	9	28	6	8	9	3	2	0	3	k__Bacteria;p__Proteobacteria;c__Gammaproteobacteria;o__Gammaproteobacteria_Incertae_Sedis;f__Unknown_Family;g__Acidibacter;s__
Otu000427	4	3	18	3	5	4	1	2	0	0	5	7	26	15	11	5	1	1	k__Bacteria;p__Firmicutes;c__Clostridia;o__Clostridiales;f__Lachnospiraceae
Otu000428	0	1	1	0	5	0	0	2	0	1	0	64	4	8	0	24	0	0	k__Bacteria;p__Firmicutes;c__Clostridia;o__Clostridiales;f__Lachnospiraceae;g__Lachnospiraceae_NK4A136_group;s__Lachnospiraceae_bacterium_A4
Otu000429	0	0	0	0	9	24	1	3	4	0	15	10	1	14	0	0	29	0	k__Bacteria;p__Firmicutes;c__Clostridia;o__Clostridiales;f__Lachnospiraceae
Otu000430	0	7	0	0	11	41	0	0	12	0	2	0	10	13	0	0	1	12	k__Bacteria;p__Firmicutes;c__Clostridia;o__Clostridiales;f__Lachnospiraceae;g__Lachnospiraceae_NK4A136_group;s__Lachnospiraceae_bacterium_COE1
Otu000431	15	4	0	15	5	7	14	0	0	0	1	3	3	0	34	5	2	1	k__Bacteria;p__Firmicutes;c__Clostridia;o__Clostridiales;f__Ruminococcaceae
Otu000432	0	6	23	4	4	9	1	3	5	13	4	6	20	4	3	2	1	0	k__Bacteria;p__Firmicutes;c__Clostridia;o__Clostridiales;f__Ruminococcaceae;g__Ruminiclostridium;s__
Otu000433	12	10	1	3	3	0	6	1	0	15	15	3	3	6	12	10	4	4	k__Bacteria;p__Bacteroidetes;c__Bacteroidia;o__Bacteroidales;f__Muribaculaceae;g__;s__
Otu000434	2	12	2	0	3	2	5	6	34	7	24	4	6	0	0	0	0	1	k__Bacteria;p__Chloroflexi;c__Anaerolineae;o__Anaerolineales;f__Anaerolineaceae;g__UTCFX1;s__
Otu000435	12	1	9	0	2	14	15	1	0	1	4	14	0	17	1	9	3	4	k__Bacteria;p__Firmicutes;c__Clostridia;o__Clostridiales;f__Clostridiales_vadinBB60_group;g__;s__
Otu000436	12	6	1	2	3	2	3	3	2	9	13	6	6	10	4	6	14	5	k__Bacteria;p__Bacteroidetes;c__Bacteroidia;o__Bacteroidales;f__Muribaculaceae;g__;s__
Otu000437	5	7	1	1	3	0	3	3	28	6	21	7	9	3	2	4	1	3	k__Bacteria;p__Acidobacteria;c__Subgroup_6
Otu000438	0	2	0	0	0	0	0	1	0	0	0	0	0	88	0	10	2	4	k__Bacteria;p__Firmicutes;c__Clostridia;o__Clostridiales;f__Ruminococcaceae;g__Ruminococcaceae_UCG-014;s__
Otu000439	25	1	4	2	18	1	4	31	0	0	0	3	12	2	1	0	0	3	k__Bacteria;p__Firmicutes;c__Clostridia;o__Clostridiales;f__Ruminococcaceae
Otu000440	0	0	0	0	104	1	0	0	0	0	2	0	0	0	0	0	0	0	k__Bacteria;p__Firmicutes;c__Erysipelotrichia;o__Erysipelotrichales;f__Erysipelotrichaceae;g__Faecalitalea;s__
Otu000441	0	0	0	0	48	4	27	12	0	0	7	1	0	3	0	2	3	0	k__Bacteria;p__Firmicutes;c__Clostridia;o__Clostridiales;f__Ruminococcaceae;g__Ruminococcaceae_UCG-014;s__
Otu000442	0	4	12	1	28	10	3	7	1	0	6	3	14	10	3	1	2	1	k__Bacteria;p__Firmicutes;c__Clostridia;o__Clostridiales;f__Ruminococcaceae
Otu000443	2	54	0	0	0	0	32	4	0	0	14	0	0	0	0	0	0	0	k__Bacteria;p__Firmicutes;c__Clostridia;o__Clostridiales;f__Clostridiales_vadinBB60_group;g__;s__
Otu000444	3	4	4	0	2	3	8	4	27	11	17	1	7	6	0	4	1	2	k__Bacteria;p__Proteobacteria;c__Gammaproteobacteria;o__Betaproteobacteriales;f__Nitrosomonadaceae;g__MND1;s__
Otu000445	7	2	7	3	2	0	6	2	25	6	14	3	20	5	0	0	2	0	k__Bacteria;p__Acidobacteria;c__Subgroup_6;o__Acidobacteria_bacterium_SCN_69-37;f__;g__;s__
Otu000446	10	4	5	7	25	6	6	2	3	0	6	4	5	9	2	1	7	1	k__Bacteria;p__Actinobacteria;c__Coriobacteriia;o__Coriobacteriales;f__Eggerthellaceae
Otu000447	0	1	1	10	6	3	10	21	6	0	10	5	13	7	0	2	0	8	k__Bacteria;p__Firmicutes;c__Clostridia;o__Clostridiales;f__Lachnospiraceae;g__Lachnospiraceae_NK4A136_group;s__
Otu000448	11	5	4	7	3	7	7	2	7	7	1	1	15	4	6	2	9	4	k__Bacteria;p__Bacteroidetes;c__Bacteroidia;o__Bacteroidales;f__Muribaculaceae;g__;s__
Otu000449	6	6	3	1	6	8	6	1	9	11	3	4	8	1	7	0	11	11	k__Bacteria;p__Bacteroidetes;c__Bacteroidia;o__Bacteroidales;f__Muribaculaceae
Otu000450	5	3	4	4	18	3	6	1	0	3	0	4	9	25	5	0	4	8	k__Bacteria;p__Firmicutes;c__Clostridia;o__Clostridiales;f__Family_XIII
Otu000451	3	8	7	10	1	5	2	0	0	11	1	3	1	12	2	28	6	2	k__Bacteria;p__Bacteroidetes;c__Bacteroidia;o__Bacteroidales;f__Muribaculaceae
Otu000452	0	6	39	0	6	0	2	0	15	0	0	4	9	16	0	4	1	0	k__Bacteria;p__Firmicutes;c__Clostridia;o__Clostridiales;f__Lachnospiraceae
Otu000453	8	2	3	4	2	12	6	4	13	4	3	3	4	0	9	2	17	5	k__Bacteria;p__Bacteroidetes;c__Bacteroidia;o__Bacteroidales;f__Muribaculaceae;g__;s__
Otu000454	3	1	18	5	12	3	4	2	1	2	9	7	25	1	7	1	0	0	k__Bacteria;p__Firmicutes;c__Clostridia;o__Clostridiales;f__Ruminococcaceae;g__Anaerotruncus;s__
Otu000455	0	7	6	2	9	1	0	2	36	4	0	6	10	5	6	1	2	3	k__Bacteria;p__Firmicutes;c__Clostridia;o__Clostridiales;f__Ruminococcaceae;g__Ruminococcaceae_UCG-009
Otu000456	3	2	3	7	4	14	7	2	9	9	5	3	8	0	6	1	11	6	k__Bacteria;p__Bacteroidetes;c__Bacteroidia;o__Bacteroidales;f__Muribaculaceae
Otu000457	0	0	0	0	0	0	0	75	0	0	0	0	2	6	0	17	0	0	k__Bacteria;p__Firmicutes;c__Clostridia;o__Clostridiales;f__Lachnospiraceae;g__Acetatifactor;s__
Otu000458	2	0	23	6	13	4	0	0	0	9	2	0	4	0	8	8	8	12	k__Bacteria;p__Firmicutes;c__Clostridia;o__Clostridiales;f__Ruminococcaceae;g__Eubacterium_coprostanoligenes_group
Otu000459	0	0	8	0	17	0	2	0	10	3	11	3	2	27	9	1	6	0	k__Bacteria;p__Firmicutes;c__Clostridia;o__Clostridiales;f__Lachnospiraceae;g__Lachnospiraceae_NK4A136_group;s__
Otu000460	3	8	3	12	6	6	0	3	2	5	23	6	7	3	3	5	4	0	k__Bacteria;p__Firmicutes;c__Clostridia;o__Clostridiales;f__Lachnospiraceae;g__GCA-900066575;s__
Otu000461	8	2	6	5	6	5	2	10	0	9	7	4	2	7	11	4	6	5	k__Bacteria;p__Bacteroidetes;c__Bacteroidia;o__Bacteroidales;f__Rikenellaceae;g__Alistipes
Otu000462	5	4	7	9	7	1	1	1	0	7	11	8	11	7	3	8	4	5	k__Bacteria;p__Firmicutes;c__Clostridia;o__Clostridiales;f__Ruminococcaceae
Otu000463	13	4	0	2	3	4	6	0	1	12	7	8	6	4	1	16	8	4	k__Bacteria;p__Bacteroidetes;c__Bacteroidia;o__Bacteroidales;f__Muribaculaceae;g__;s__
Otu000464	6	6	8	1	1	1	7	4	35	6	12	0	7	2	0	1	1	0	k__Bacteria;p__Bacteroidetes;c__Bacteroidia;o__Bacteroidales;f__Bacteroidaceae;g__Bacteroides;s__Bacteroides_neonati
Otu000465	14	11	4	0	2	0	14	0	0	2	0	5	0	9	0	9	11	17	k__Bacteria;p__Firmicutes;c__Clostridia;o__Clostridiales;f__Ruminococcaceae;g__Ruminococcaceae_UCG-010;s__
Otu000466	0	0	11	27	24	1	1	12	4	0	0	2	1	3	8	1	3	0	k__Bacteria;p__Firmicutes;c__Clostridia;o__Clostridiales;f__Ruminococcaceae
Otu000467	2	6	1	5	3	8	12	5	1	10	2	3	13	1	2	2	10	12	k__Bacteria;p__Bacteroidetes;c__Bacteroidia;o__Bacteroidales;f__Muribaculaceae;g__;s__
Otu000468	0	0	0	0	0	3	12	68	0	0	0	11	0	0	0	2	2	0	k__Bacteria;p__Firmicutes;c__Clostridia;o__Clostridiales;f__Clostridiales_vadinBB60_group;g__;s__
Otu000469	9	11	1	3	4	1	1	0	3	3	7	0	7	6	6	13	14	7	k__Bacteria;p__Bacteroidetes;c__Bacteroidia;o__Bacteroidales;f__Muribaculaceae;g__;s__
Otu000470	8	1	7	4	5	5	11	3	1	8	1	2	21	0	14	0	4	1	k__Bacteria;p__Bacteroidetes;c__Bacteroidia;o__Bacteroidales;f__Muribaculaceae;g__;s__
Otu000471	0	54	0	0	0	0	0	2	0	0	4	0	0	31	0	2	3	0	k__Bacteria;p__Firmicutes;c__Clostridia;o__Clostridiales
Otu000472	7	9	1	4	1	1	1	1	0	12	4	4	5	12	10	14	8	1	k__Bacteria;p__Bacteroidetes;c__Bacteroidia;o__Bacteroidales;f__Muribaculaceae;g__;s__
Otu000473	0	1	6	12	16	10	6	0	0	0	0	0	37	0	0	0	0	7	k__Bacteria;p__Firmicutes;c__Clostridia;o__Clostridiales
Otu000474	0	25	2	0	24	0	0	1	2	0	0	0	10	18	0	1	0	11	k__Bacteria;p__Firmicutes;c__Clostridia;o__Clostridiales;f__Lachnospiraceae
Otu000475	25	6	38	0	1	0	1	1	0	0	5	12	0	4	0	0	0	1	k__Bacteria;p__Firmicutes;c__Clostridia;o__Clostridiales;f__Lachnospiraceae;g__Lachnospiraceae_NK4A136_group;s__
Otu000476	16	1	0	0	9	0	0	0	0	0	0	1	41	20	0	3	3	0	k__Bacteria;p__Tenericutes;c__Mollicutes;o__Mollicutes_RF39;f__;g__;s__
Otu000477	1	2	8	7	5	1	7	1	2	13	1	1	15	1	13	3	7	6	k__Bacteria;p__Bacteroidetes;c__Bacteroidia;o__Bacteroidales;f__Muribaculaceae;g__;s__
Otu000478	4	7	2	0	1	2	5	3	17	13	14	3	13	2	0	3	1	3	k__Bacteria;p__Proteobacteria;c__Gammaproteobacteria;o__Steroidobacterales;f__Steroidobacteraceae;g__;s__
Otu000479	7	6	1	1	0	3	5	5	0	13	6	4	5	11	4	11	7	4	k__Bacteria;p__Bacteroidetes;c__Bacteroidia;o__Bacteroidales;f__Muribaculaceae;g__;s__
Otu000480	2	2	2	2	11	0	4	0	0	1	0	1	13	16	2	7	30	0	k__Bacteria;p__Firmicutes;c__Clostridia;o__Clostridiales;f__Ruminococcaceae;g__Ruminococcaceae_UCG-014;s__
Otu000481	0	83	0	0	0	0	0	0	0	0	0	6	0	4	0	0	0	0	k__Bacteria;p__Firmicutes;c__Clostridia;o__Clostridiales;f__Lachnospiraceae;g__Lachnospiraceae_UCG-001;s__
Otu000482	0	0	0	0	91	0	0	1	0	0	0	0	0	0	0	0	0	0	k__Bacteria;p__Firmicutes;c__Clostridia;o__Clostridiales;f__Ruminococcaceae;g__Ruminiclostridium_6;s__
Otu000483	4	1	0	0	6	0	0	0	8	6	24	0	3	16	5	3	11	5	k__Bacteria;p__Actinobacteria;c__Actinobacteria;o__Corynebacteriales;f__Nocardiaceae;g__Gordonia;s__
Otu000484	2	1	6	0	18	7	5	0	0	8	0	2	1	0	0	15	11	16	k__Bacteria;p__Firmicutes;c__Clostridia;o__Clostridiales
Otu000485	2	2	4	5	2	6	7	1	3	9	2	0	12	5	9	0	14	8	k__Bacteria;p__Bacteroidetes;c__Bacteroidia;o__Bacteroidales;f__Muribaculaceae;g__;s__
Otu000486	4	7	14	3	2	3	7	1	0	7	4	4	4	6	1	15	7	2	k__Bacteria;p__Bacteroidetes;c__Bacteroidia;o__Bacteroidales;f__Muribaculaceae;g__;s__
Otu000487	4	5	3	3	3	5	3	2	30	5	17	4	3	1	0	1	0	2	k__Bacteria;p__Proteobacteria;c__Alphaproteobacteria;o__Sphingomonadales;f__Sphingomonadaceae;g__Altererythrobacter;s__
Otu000488	0	7	0	8	1	1	5	3	6	26	9	0	0	13	1	9	1	1	k__Bacteria;p__Firmicutes;c__Clostridia;o__Clostridiales;f__Lachnospiraceae
Otu000489	8	4	7	3	2	0	10	4	0	9	0	5	10	3	8	8	6	4	k__Bacteria;p__Bacteroidetes;c__Bacteroidia;o__Bacteroidales;f__Muribaculaceae;g__;s__
Otu000490	0	0	0	0	85	1	0	0	0	0	0	0	0	0	0	0	0	5	k__Bacteria;p__Firmicutes;c__Clostridia;o__Clostridiales;f__Ruminococcaceae;g__Ruminococcaceae_NK4A214_group;s__
Otu000491	1	3	2	7	8	9	9	1	4	7	3	7	5	1	5	3	6	9	k__Bacteria;p__Bacteroidetes;c__Bacteroidia;o__Bacteroidales;f__Muribaculaceae
Otu000492	13	5	3	2	7	5	0	0	0	1	0	0	15	3	4	1	9	22	k__Bacteria;p__Firmicutes;c__Clostridia;o__Clostridiales;f__Ruminococcaceae;g__Ruminococcaceae_UCG-007;s__
Otu000493	1	4	3	1	4	1	5	4	31	7	12	5	8	1	0	1	0	2	k__Bacteria;p__Proteobacteria;c__Gammaproteobacteria;o__Xanthomonadales;f__Xanthomonadaceae;g__Luteimonas
Otu000494	1	1	0	0	15	1	1	70	0	0	0	0	1	0	0	0	0	0	k__Bacteria;p__Firmicutes;c__Clostridia;o__Clostridiales;f__Clostridiales_vadinBB60_group
Otu000495	6	8	0	0	0	3	4	7	0	6	0	4	6	4	3	1	19	19	k__Bacteria;p__Firmicutes;c__Clostridia;o__Clostridiales;f__Ruminococcaceae
Otu000496	1	5	6	9	6	3	2	1	0	0	0	3	10	9	3	12	13	7	k__Bacteria;p__Firmicutes;c__Clostridia;o__Clostridiales;f__Lachnospiraceae
Otu000497	6	0	2	0	8	17	4	26	1	5	0	7	1	0	0	0	6	7	k__Bacteria;p__Firmicutes;c__Clostridia;o__Clostridiales;f__Ruminococcaceae;g__Ruminococcaceae_UCG-010;s__
Otu000498	5	9	2	0	0	1	2	2	32	14	7	8	7	0	0	0	0	0	k__Bacteria;p__Proteobacteria;c__Gammaproteobacteria;o__Betaproteobacteriales;f__Burkholderiaceae;g__Limnobacter
Otu000499	6	5	9	5	0	1	10	5	2	15	2	1	5	2	12	3	2	4	k__Bacteria;p__Bacteroidetes;c__Bacteroidia;o__Bacteroidales
Otu000500	2	4	17	5	0	6	9	0	0	9	0	3	5	1	16	4	4	4	k__Bacteria;p__Bacteroidetes;c__Bacteroidia;o__Bacteroidales;f__Tannerellaceae;g__Macellibacteroides
Otu000501	3	4	26	4	13	1	2	1	2	0	13	5	2	6	3	3	0	1	k__Bacteria;p__Firmicutes;c__Clostridia;o__Clostridiales;f__Family_XIII;g__Eubacterium_brachy_group;s__
Otu000502	17	34	14	0	3	1	0	4	5	0	0	6	0	2	0	3	0	0	k__Bacteria;p__Firmicutes;c__Clostridia;o__Clostridiales;f__Ruminococcaceae
Otu000503	0	4	10	3	4	5	1	1	2	2	0	3	7	27	3	13	4	0	k__Bacteria;p__Firmicutes;c__Clostridia;o__Clostridiales;f__Lachnospiraceae
Otu000504	5	4	5	1	3	2	0	2	29	3	14	1	12	2	1	1	0	3	k__Bacteria;p__Firmicutes;c__Erysipelotrichia;o__Erysipelotrichales;f__Erysipelotrichaceae;g__Anaerorhabdus_furcosa_group
Otu000505	7	1	2	0	0	0	14	0	0	0	0	0	64	0	0	0	0	0	k__Bacteria;p__Firmicutes;c__Erysipelotrichia;o__Erysipelotrichales;f__Erysipelotrichaceae
Otu000506	0	0	0	0	21	0	0	0	12	0	0	0	0	43	0	12	0	0	k__Bacteria;p__Firmicutes;c__Clostridia;o__Clostridiales;f__Lachnospiraceae
Otu000507	3	0	13	2	12	7	0	0	0	11	0	0	4	0	10	14	5	7	k__Bacteria;p__Firmicutes;c__Clostridia;o__Clostridiales;f__Ruminococcaceae;g__Eubacterium_coprostanoligenes_group
Otu000508	1	0	4	23	6	0	6	0	0	24	0	3	9	0	12	0	0	0	k__Bacteria;p__Firmicutes;c__Clostridia;o__Clostridiales;f__Ruminococcaceae
Otu000509	34	15	2	0	16	3	1	0	0	1	0	5	0	4	0	2	2	3	k__Bacteria;p__Firmicutes;c__Clostridia;o__Clostridiales;f__Ruminococcaceae;g__Ruminococcaceae_UCG-013;s__
Otu000510	2	6	0	0	2	3	7	5	25	6	8	6	15	2	0	0	0	0	k__Bacteria;p__Proteobacteria;c__Gammaproteobacteria;o__R7C24;f__;g__;s__
Otu000511	0	0	0	0	0	0	0	0	0	0	0	0	0	2	81	1	0	3	k__Bacteria;p__Bacteroidetes;c__Bacteroidia;o__Bacteroidales;f__Muribaculaceae;g__;s__
Otu000512	0	3	6	5	12	0	5	0	3	2	0	10	6	7	0	24	0	4	k__Bacteria;p__Firmicutes;c__Clostridia;o__Clostridiales;f__Lachnospiraceae;g__Roseburia;s__
Otu000513	9	4	2	0	2	9	6	3	10	4	6	1	7	1	4	3	10	6	k__Bacteria;p__Bacteroidetes;c__Bacteroidia;o__Bacteroidales;f__Muribaculaceae;g__;s__
Otu000514	1	5	3	5	8	9	2	4	8	5	1	2	5	2	6	2	11	8	k__Bacteria;p__Bacteroidetes;c__Bacteroidia;o__Bacteroidales;f__Muribaculaceae;g__;s__
Otu000515	0	0	1	0	2	38	1	24	0	0	11	1	0	1	0	0	7	0	k__Bacteria;p__Firmicutes;c__Clostridia;o__Clostridiales;f__Ruminococcaceae;g__Ruminococcaceae_UCG-014;s__
Otu000516	0	0	0	0	13	12	0	0	2	0	2	0	56	1	0	0	0	0	k__Bacteria;p__Firmicutes;c__Clostridia;o__Clostridiales;f__Lachnospiraceae
Otu000517	8	2	5	0	1	3	4	1	21	3	17	9	9	0	0	0	0	3	k__Bacteria;p__Proteobacteria;c__Gammaproteobacteria;o__Xanthomonadales;f__Xanthomonadaceae;g__Lysobacter;s__Lysobacter_sp
Otu000518	0	0	15	5	3	0	0	5	22	1	1	5	9	14	6	0	0	0	k__Bacteria;p__Firmicutes;c__Clostridia;o__Clostridiales;f__Ruminococcaceae;g__Anaerotruncus;s__
Otu000519	0	4	2	0	7	0	12	0	1	0	55	0	0	2	2	0	0	0	k__Bacteria;p__Firmicutes;c__Clostridia;o__Clostridiales;f__Ruminococcaceae;g__Ruminococcaceae_UCG-014;s__
Otu000520	0	0	0	0	0	0	14	0	0	0	0	0	0	0	0	39	20	12	k__Bacteria;p__Bacteroidetes;c__Bacteroidia;o__Bacteroidales;f__Muribaculaceae;g__;s__
Otu000521	11	4	2	3	12	1	2	2	2	1	4	4	5	8	0	10	0	14	k__Bacteria;p__Firmicutes;c__Clostridia;o__Clostridiales;f__Ruminococcaceae
Otu000522	0	0	0	0	13	0	0	0	2	0	67	0	1	0	0	1	0	0	k__Bacteria;p__Firmicutes;c__Clostridia;o__Clostridiales;f__Lachnospiraceae;g__Lachnospiraceae_NK4A136_group;s__
Otu000523	14	0	0	0	0	0	0	67	0	0	0	0	0	0	0	0	3	0	k__Bacteria;p__Firmicutes;c__Clostridia;o__Clostridiales;f__Ruminococcaceae;g__Ruminococcaceae_UCG-014;s__
Otu000524	1	4	9	3	2	2	3	3	11	3	15	6	8	10	2	0	1	1	k__Bacteria;p__Proteobacteria;c__Gammaproteobacteria;o__Betaproteobacteriales;f__Nitrosomonadaceae;g__Ellin6067;s__
Otu000525	3	3	1	2	4	12	6	6	6	3	1	1	8	2	6	1	11	7	k__Bacteria;p__Bacteroidetes;c__Bacteroidia;o__Bacteroidales;f__Muribaculaceae;g__;s__
Otu000526	0	15	0	0	26	0	0	14	0	0	0	11	0	5	0	0	12	0	k__Bacteria;p__Tenericutes;c__Mollicutes;o__Mollicutes_RF39;f__;g__;s__
Otu000527	2	5	4	3	3	7	5	1	18	7	10	5	7	3	0	1	0	1	k__Bacteria;p__Chloroflexi;c__KD4-96;o__;f__;g__;s__
Otu000528	1	5	3	0	1	4	3	4	27	4	18	4	7	0	0	0	1	0	k__Bacteria;p__Proteobacteria;c__Gammaproteobacteria;o__Xanthomonadales;f__Xanthomonadaceae
Otu000529	1	2	12	1	7	2	3	4	1	8	6	1	1	24	3	1	5	0	k__Bacteria;p__Firmicutes;c__Clostridia;o__Clostridiales;f__Lachnospiraceae;g__A2;s__
Otu000530	1	7	4	7	2	4	3	0	0	11	2	1	19	0	8	4	4	5	k__Bacteria;p__Bacteroidetes;c__Bacteroidia;o__Bacteroidales;f__Muribaculaceae;g__;s__
Otu000531	1	0	17	2	6	2	0	0	0	14	1	0	5	0	9	13	1	10	k__Bacteria;p__Firmicutes;c__Clostridia;o__Clostridiales;f__Ruminococcaceae;g__Eubacterium_coprostanoligenes_group
Otu000532	4	2	3	4	4	7	5	3	5	7	0	4	10	0	4	0	8	11	k__Bacteria;p__Bacteroidetes;c__Bacteroidia;o__Bacteroidales;f__Muribaculaceae;g__;s__
Otu000533	0	0	0	0	0	0	22	0	0	0	0	0	0	0	0	2	41	15	k__Bacteria;p__Bacteroidetes;c__Bacteroidia;o__Bacteroidales;f__Muribaculaceae;g__;s__
Otu000534	10	3	1	0	2	2	5	1	21	4	13	5	10	2	0	0	0	1	k__Bacteria;p__Proteobacteria;c__Gammaproteobacteria;o__Xanthomonadales;f__Xanthomonadaceae;g__Arenimonas;s__Arenimonas_composti_TR7-09_=_DSM_18010
Otu000535	0	0	5	0	0	0	5	6	0	7	24	0	0	0	0	22	2	9	k__Bacteria;p__Firmicutes;c__Clostridia;o__Clostridiales;f__Ruminococcaceae;g__Ruminococcaceae_UCG-014;s__
Otu000536	1	5	4	0	2	3	2	1	24	5	18	5	7	0	0	1	0	2	k__Bacteria;p__Proteobacteria;c__Gammaproteobacteria;o__Xanthomonadales;f__Xanthomonadaceae;g__Luteimonas
Otu000537	0	0	0	0	0	0	0	0	0	11	26	42	0	0	0	0	0	0	k__Bacteria;p__Bacteroidetes;c__Bacteroidia;o__Bacteroidales;f__Muribaculaceae
Otu000538	1	11	1	3	3	1	2	2	2	3	2	0	6	19	0	10	11	2	k__Bacteria;p__Bacteroidetes;c__Bacteroidia;o__Bacteroidales;f__Muribaculaceae
Otu000539	5	6	1	0	2	0	4	3	33	3	11	4	7	0	0	0	0	0	k__Bacteria;p__Acidobacteria;c__Blastocatellia_Subgroup_4;o__Blastocatellales;f__Blastocatellaceae
Otu000540	2	0	1	0	3	4	0	21	0	0	0	0	2	1	0	42	0	2	k__Bacteria;p__Firmicutes;c__Clostridia;o__Clostridiales;f__Lachnospiraceae;g__Lachnospiraceae_NK4A136_group;s__Lachnospiraceae_bacterium_10-1
Otu000541	2	3	10	3	1	2	10	0	0	18	12	4	2	3	0	7	1	0	k__Bacteria;p__Firmicutes;c__Clostridia;o__Clostridiales;f__Ruminococcaceae
Otu000542	3	9	1	1	2	4	11	0	19	9	10	2	2	0	1	2	0	2	k__Bacteria;p__Proteobacteria;c__Gammaproteobacteria;o__Betaproteobacteriales;f__Burkholderiaceae;g__;s__
Otu000543	9	2	5	0	0	9	1	3	4	1	13	7	4	6	8	1	1	4	k__Bacteria;p__Firmicutes;c__Clostridia;o__Clostridiales;f__Ruminococcaceae;g__Harryflintia;s__
Otu000544	0	1	9	0	0	37	0	25	0	6	0	0	0	0	0	0	0	0	k__Bacteria;p__Firmicutes;c__Clostridia;o__Clostridiales;f__Lachnospiraceae;g__A2
Otu000545	1	0	2	0	1	2	0	0	7	3	3	1	13	6	14	20	3	1	k__Bacteria;p__Firmicutes;c__Clostridia;o__Clostridiales;f__Lachnospiraceae;g__Roseburia
Otu000546	8	1	0	1	0	0	3	2	0	12	1	4	17	4	8	0	14	2	k__Bacteria;p__Bacteroidetes;c__Bacteroidia;o__Bacteroidales;f__Muribaculaceae;g__;s__
Otu000547	0	5	13	1	20	2	9	2	0	0	11	4	0	0	0	1	2	6	k__Bacteria;p__Firmicutes;c__Clostridia;o__Clostridiales;f__Ruminococcaceae
Otu000548	17	3	0	2	2	2	5	0	0	9	1	2	11	4	4	8	3	2	k__Bacteria;p__Bacteroidetes;c__Bacteroidia;o__Bacteroidales;f__Muribaculaceae;g__;s__
Otu000549	3	2	4	1	0	1	3	1	23	10	9	0	14	0	1	2	0	1	k__Bacteria;p__Nitrospirae;c__Nitrospira;o__Nitrospirales;f__Nitrospiraceae;g__Nitrospira
Otu000550	0	0	0	0	16	0	0	4	0	0	0	0	2	50	2	0	0	1	k__Bacteria;p__Firmicutes;c__Clostridia;o__Clostridiales;f__Lachnospiraceae
Otu000551	2	10	0	0	3	7	0	5	0	0	4	10	0	13	0	11	0	9	k__Bacteria;p__Tenericutes;c__Mollicutes;o__Mollicutes_RF39;f__;g__;s__
Otu000552	0	0	0	0	73	1	0	0	0	0	0	0	0	0	0	0	0	0	k__Bacteria;p__Firmicutes;c__Clostridia;o__Clostridiales;f__Lachnospiraceae
Otu000553	3	8	2	1	1	2	5	3	12	4	13	4	7	3	0	0	0	5	k__Bacteria;p__Proteobacteria;c__Gammaproteobacteria;o__Betaproteobacteriales;f__Nitrosomonadaceae;g__Ellin6067
Otu000554	8	3	0	0	1	1	3	2	0	6	11	4	5	6	4	9	8	2	k__Bacteria;p__Bacteroidetes;c__Bacteroidia;o__Bacteroidales;f__Muribaculaceae;g__;s__
Otu000555	7	8	1	6	1	2	1	1	0	3	5	4	7	7	5	4	8	3	k__Bacteria;p__Bacteroidetes;c__Bacteroidia;o__Bacteroidales;f__Muribaculaceae;g__;s__
Otu000556	0	0	37	0	2	0	3	0	0	10	0	1	1	19	0	0	0	0	k__Bacteria;p__Firmicutes;c__Clostridia;o__Clostridiales;f__Ruminococcaceae
Otu000557	5	7	0	0	2	5	2	3	18	9	7	7	8	0	0	0	0	0	k__Bacteria;p__Bacteroidetes;c__Bacteroidia;o__Bacteroidales;f__Bacteroidetes_vadinHA17;g__;s__
Otu000558	5	2	6	2	2	0	12	4	0	5	0	6	10	0	4	3	9	3	k__Bacteria;p__Bacteroidetes;c__Bacteroidia;o__Bacteroidales;f__Muribaculaceae
Otu000559	1	5	1	0	0	1	1	0	21	12	4	1	20	2	0	2	1	0	k__Bacteria;p__Proteobacteria;c__Gammaproteobacteria;o__Betaproteobacteriales;f__Burkholderiaceae;g__Ralstonia;s__
Otu000560	0	1	10	2	3	0	0	9	0	0	0	0	8	6	17	5	1	10	k__Bacteria;p__Firmicutes;c__Clostridia;o__Clostridiales;f__Ruminococcaceae;g__Ruminococcaceae_UCG-014;s__
Otu000561	4	7	7	5	3	6	3	12	0	1	2	0	3	0	9	4	2	4	k__Bacteria;p__Bacteroidetes;c__Bacteroidia;o__Bacteroidales;f__Rikenellaceae;g__Alistipes
Otu000562	39	7	1	0	0	0	15	0	0	0	0	7	0	0	0	0	0	2	k__Bacteria;p__Firmicutes;c__Clostridia;o__Clostridiales;f__Ruminococcaceae;g__Ruminococcus_1
Otu000563	1	5	5	13	2	7	0	0	4	6	18	3	0	1	0	4	1	1	k__Bacteria;p__Firmicutes;c__Bacilli;o__Lactobacillales;f__Lactobacillaceae;g__Lactobacillus;s__Lactobacillus_gasseri
Otu000564	6	7	1	3	3	2	1	1	4	4	2	3	1	9	2	10	8	4	k__Bacteria;p__Bacteroidetes;c__Bacteroidia;o__Bacteroidales;f__Muribaculaceae;g__;s__
Otu000565	5	0	6	3	3	2	4	0	0	13	4	2	10	3	4	2	6	4	k__Bacteria;p__Bacteroidetes;c__Bacteroidia;o__Bacteroidales;f__Muribaculaceae;g__;s__
Otu000566	3	2	4	0	1	2	5	0	30	2	8	4	8	1	0	0	0	1	k__Bacteria;p__Proteobacteria;c__Gammaproteobacteria;o__Betaproteobacteriales;f__TRA3-20;g__;s__
Otu000567	7	3	5	0	4	2	5	2	22	6	8	1	5	1	0	0	0	0	k__Bacteria;p__Proteobacteria;c__Gammaproteobacteria;o__Betaproteobacteriales;f__Rhodocyclaceae;g__Azoarcus;s__
Otu000568	0	6	8	13	1	4	3	0	5	5	13	3	1	2	1	2	1	2	k__Bacteria;p__Firmicutes;c__Bacilli;o__Lactobacillales;f__Lactobacillaceae;g__Lactobacillus;s__Lactobacillus_gasseri
Otu000569	0	61	0	0	0	0	1	4	2	0	0	0	0	2	0	0	0	0	k__Bacteria;p__Firmicutes;c__Clostridia;o__Clostridiales;f__Lachnospiraceae
Otu000570	3	4	3	2	0	4	5	0	20	6	13	3	7	0	0	0	0	0	k__Bacteria;p__Proteobacteria;c__Alphaproteobacteria;o__Dongiales;f__Dongiaceae;g__Dongia;s__
Otu000571	2	2	2	0	2	2	7	0	0	5	2	6	1	8	1	8	5	16	k__Bacteria;p__Firmicutes;c__Clostridia;o__Clostridiales;f__Ruminococcaceae;g__Ruminococcaceae_UCG-013;s__
Otu000572	5	1	1	6	2	5	24	0	0	0	0	3	4	0	1	0	0	17	k__Bacteria;p__Firmicutes;c__Clostridia;o__Clostridiales;f__Ruminococcaceae;g__Ruminococcaceae_UCG-013;s__
Otu000573	18	2	1	2	0	1	3	1	0	11	5	3	5	4	3	5	2	3	k__Bacteria;p__Bacteroidetes;c__Bacteroidia;o__Bacteroidales;f__Muribaculaceae;g__;s__
Otu000574	5	5	0	0	2	0	1	0	17	6	13	4	2	3	0	2	3	6	k__Bacteria;p__Acidobacteria;c__Subgroup_6
Otu000575	0	1	10	2	18	0	4	1	2	0	6	3	1	7	0	12	1	1	k__Bacteria;p__Firmicutes;c__Clostridia;o__Clostridiales;f__Lachnospiraceae;g__Lachnospiraceae_UCG-001;s__
Otu000576	2	9	4	1	1	1	1	3	14	5	8	2	10	3	1	0	1	2	k__Bacteria;p__Acidobacteria;c__Subgroup_6;o__;f__;g__;s__
Otu000577	1	0	12	0	0	1	4	2	0	0	3	14	26	3	0	0	2	0	k__Bacteria;p__Firmicutes;c__Clostridia;o__Clostridiales;f__Lachnospiraceae;g__Lachnoclostridium;s__
Otu000578	0	13	0	1	15	0	2	0	0	0	0	2	7	8	2	7	0	11	k__Bacteria;p__Firmicutes;c__Clostridia;o__Clostridiales;f__Ruminococcaceae;g__Eubacterium_coprostanoligenes_group
Otu000579	3	5	2	8	7	5	5	2	0	9	0	1	5	1	4	5	3	3	k__Bacteria;p__Bacteroidetes;c__Bacteroidia;o__Bacteroidales;f__Muribaculaceae
Otu000580	7	3	2	1	2	4	2	2	0	9	6	3	7	4	4	5	4	3	k__Bacteria;p__Bacteroidetes;c__Bacteroidia;o__Bacteroidales;f__Muribaculaceae;g__;s__
Otu000581	0	1	0	0	62	0	5	0	0	0	0	0	0	0	0	0	0	0	k__Bacteria;p__Firmicutes;c__Clostridia;o__Clostridiales;f__Lachnospiraceae;g__Lachnospiraceae_NK4A136_group;s__
Otu000582	0	0	0	0	2	0	0	0	0	0	0	17	0	44	5	0	0	0	k__Bacteria;p__Firmicutes;c__Clostridia;o__Clostridiales;f__Lachnospiraceae
Otu000583	1	5	9	0	4	1	3	1	18	3	8	1	9	2	0	3	0	0	k__Bacteria;p__Proteobacteria;c__Gammaproteobacteria;o__Betaproteobacteriales;f__Hydrogenophilaceae;g__Thiobacillus;s__
Otu000584	0	0	0	0	0	0	0	0	0	3	27	38	0	0	0	0	0	0	k__Bacteria;p__Bacteroidetes;c__Bacteroidia;o__Bacteroidales;f__Muribaculaceae
Otu000585	0	5	1	0	1	3	1	0	20	6	13	0	11	1	0	2	2	1	k__Bacteria;p__Acidobacteria;c__Subgroup_6;o__;f__;g__;s__
Otu000586	0	6	5	4	0	3	4	0	0	8	3	1	2	3	4	17	3	4	k__Bacteria;p__Bacteroidetes;c__Bacteroidia;o__Bacteroidales;f__Muribaculaceae;g__;s__
Otu000587	0	0	0	0	0	0	15	0	0	0	0	0	0	0	0	12	26	14	k__Bacteria;p__Bacteroidetes;c__Bacteroidia;o__Bacteroidales;f__Muribaculaceae;g__;s__
Otu000588	3	3	2	0	1	4	5	2	21	10	5	4	2	1	0	2	0	1	k__Bacteria;p__Acidobacteria;c__Blastocatellia_Subgroup_4;o__Pyrinomonadales;f__Pyrinomonadaceae;g__RB41;s__
Otu000589	3	3	2	0	5	0	1	0	1	4	2	3	12	8	6	7	3	6	k__Bacteria;p__Firmicutes;c__Clostridia;o__Clostridiales;f__Ruminococcaceae
Otu000590	4	4	1	0	1	0	4	4	17	5	11	3	5	2	0	0	1	3	k__Bacteria;p__Rokubacteria;c__NC10;o__Rokubacteriales;f__;g__;s__
Otu000591	0	0	0	0	0	0	0	0	0	9	21	35	0	0	0	0	0	0	k__Bacteria;p__Bacteroidetes;c__Bacteroidia;o__Bacteroidales
Otu000592	4	3	6	6	4	7	2	15	0	1	0	0	2	1	3	3	2	6	k__Bacteria;p__Bacteroidetes;c__Bacteroidia;o__Bacteroidales;f__Rikenellaceae;g__Alistipes
Otu000593	0	1	12	12	7	0	1	0	2	0	3	0	2	22	2	1	0	0	k__Bacteria;p__Firmicutes;c__Clostridia;o__Clostridiales;f__Lachnospiraceae
Otu000594	3	4	2	1	0	3	3	7	18	2	7	4	11	0	0	0	0	0	k__Bacteria;p__Chloroflexi;c__Anaerolineae;o__SBR1031;f__A4b;g__OLB13;s__
Otu000595	5	5	0	1	1	0	2	3	15	5	13	4	6	4	0	0	0	1	k__Bacteria;p__Bacteroidetes;c__Bacteroidia;o__Chitinophagales;f__Saprospiraceae;g__;s__
Otu000596	2	3	5	3	2	5	1	0	5	7	0	2	5	3	15	0	0	6	k__Bacteria;p__Bacteroidetes;c__Bacteroidia;o__Bacteroidales;f__Tannerellaceae;g__Macellibacteroides;s__bacterium_enrichment_culture_clone_BA32
Otu000597	4	12	2	3	3	5	14	0	0	3	1	4	0	1	1	6	3	2	k__Bacteria;p__Firmicutes;c__Bacilli;o__Lactobacillales;f__Streptococcaceae;g__Streptococcus;s__Streptococcus_danieliae
Otu000598	6	3	1	3	2	1	1	2	20	5	11	1	8	0	0	0	0	0	k__Bacteria;p__Chloroflexi;c__Anaerolineae;o__Anaerolineales;f__Anaerolineaceae;g__Anaerolinea;s__
Otu000599	7	0	3	3	1	7	1	4	5	3	2	2	6	1	8	2	5	4	k__Bacteria;p__Bacteroidetes;c__Bacteroidia;o__Bacteroidales;f__Muribaculaceae;g__;s__
Otu000600	4	0	8	3	3	0	2	0	0	7	0	4	9	1	13	0	5	5	k__Bacteria;p__Firmicutes;c__Clostridia;o__Clostridiales;f__Ruminococcaceae
Otu000601	0	6	8	10	2	10	5	0	4	0	6	3	0	2	1	2	2	2	k__Bacteria;p__Firmicutes;c__Bacilli;o__Lactobacillales;f__Lactobacillaceae;g__Lactobacillus
Otu000602	0	0	10	5	15	2	7	0	9	0	3	0	10	0	2	0	0	0	k__Bacteria;p__Firmicutes;c__Clostridia;o__Clostridiales;f__Ruminococcaceae;g__Harryflintia;s__
Otu000603	0	7	4	4	13	1	0	2	0	0	2	14	3	3	0	0	3	7	k__Bacteria;p__Firmicutes;c__Clostridia;o__Clostridiales;f__Lachnospiraceae
Otu000604	3	4	1	0	0	2	4	1	16	3	8	7	10	1	0	2	0	1	k__Bacteria;p__Actinobacteria;c__Actinobacteria;o__Propionibacteriales;f__Nocardioidaceae;g__Nocardioides
Otu000605	4	3	2	1	1	0	5	1	10	5	17	4	1	2	0	3	1	3	k__Archaea;p__Thaumarchaeota;c__Nitrososphaeria;o__Nitrososphaerales;f__Nitrososphaeraceae;g__;s__
Otu000606	1	4	2	3	3	0	1	2	5	3	21	2	4	1	1	0	3	7	k__Bacteria;p__Proteobacteria;c__Gammaproteobacteria;o__Betaproteobacteriales;f__TRA3-20;g__;s__
Otu000607	5	1	0	2	4	2	2	2	3	2	25	2	5	3	1	1	2	1	k__Bacteria;p__Bacteroidetes;c__Bacteroidia;o__Cytophagales;f__Microscillaceae
Otu000608	1	8	3	0	0	3	7	1	23	6	3	1	7	0	0	0	0	0	k__Bacteria;p__Proteobacteria;c__Gammaproteobacteria;o__Xanthomonadales;f__Rhodanobacteraceae;g__Dokdonella;s__
Otu000609	4	3	8	0	4	3	1	1	15	0	2	2	4	1	0	3	3	8	k__Bacteria;p__Firmicutes;c__Bacilli;o__Lactobacillales;f__Enterococcaceae;g__Enterococcus
Otu000610	8	0	2	0	3	13	0	20	0	0	0	3	8	3	1	0	0	1	k__Bacteria;p__Firmicutes;c__Clostridia;o__Clostridiales;f__Ruminococcaceae;g__Ruminococcaceae_UCG-014;s__
Otu000611	3	4	1	2	4	2	1	2	13	7	9	1	7	2	0	0	2	2	k__Bacteria;p__Firmicutes;c__Bacilli;o__Bacillales;f__Bacillaceae;g__Bacillus
Otu000612	1	7	7	3	0	0	5	1	0	3	4	2	4	5	2	11	3	4	k__Bacteria;p__Bacteroidetes;c__Bacteroidia;o__Bacteroidales;f__Muribaculaceae;g__;s__
Otu000613	3	2	4	5	1	3	4	4	4	0	3	3	6	1	4	1	8	6	k__Bacteria;p__Bacteroidetes;c__Bacteroidia;o__Bacteroidales;f__Muribaculaceae;g__;s__
Otu000614	11	10	10	0	3	0	5	3	0	0	0	0	0	11	0	1	8	0	k__Bacteria;p__Firmicutes;c__Clostridia;o__Clostridiales;f__Ruminococcaceae;g__Ruminococcaceae_UCG-014;s__
Otu000615	1	0	11	2	7	4	0	0	0	5	1	0	1	0	2	11	7	9	k__Bacteria;p__Firmicutes;c__Clostridia;o__Clostridiales;f__Ruminococcaceae;g__Eubacterium_coprostanoligenes_group
Otu000616	0	4	1	1	3	0	2	0	28	3	9	6	4	0	0	0	0	0	k__Bacteria;p__Bacteroidetes;c__Bacteroidia;o__Bacteroidales;f__Prolixibacteraceae;g__;s__
Otu000617	2	5	1	5	2	4	6	1	5	4	5	2	5	0	5	3	3	3	k__Bacteria;p__Bacteroidetes;c__Bacteroidia;o__Bacteroidales;f__Muribaculaceae;g__;s__
Otu000618	0	0	3	13	1	2	1	16	0	0	1	2	0	4	17	0	0	1	k__Bacteria;p__Tenericutes;c__Mollicutes;o__Mollicutes_RF39;f__;g__;s__
Otu000619	0	0	0	16	1	5	1	13	1	1	2	0	3	1	1	10	6	0	k__Bacteria;p__Firmicutes;c__Clostridia;o__Clostridiales;f__Lachnospiraceae;g__Lachnospiraceae_NK4A136_group;s__
Otu000620	6	8	6	19	0	0	1	0	0	0	0	0	19	0	2	0	0	0	k__Bacteria;p__Firmicutes;c__Clostridia;o__Clostridiales
Otu000621	9	9	0	0	0	3	1	0	3	0	0	2	23	3	0	0	0	8	k__Bacteria;p__Firmicutes;c__Clostridia;o__Clostridiales;f__Defluviitaleaceae;g__Defluviitaleaceae_UCG-011;s__
Otu000622	2	7	2	1	1	1	2	6	11	7	13	1	5	1	1	0	0	0	k__Bacteria;p__RsaHF231;c__bacterium_PM5-3;o__;f__;g__;s__
Otu000623	0	3	1	1	1	0	1	4	13	2	22	5	1	2	0	3	1	1	k__Bacteria;p__Acidobacteria;c__Subgroup_6;o__;f__;g__;s__
Otu000624	0	1	0	0	0	4	5	0	0	0	0	0	1	0	0	39	11	0	k__Bacteria;p__Firmicutes;c__Clostridia;o__Clostridiales;f__Ruminococcaceae;g__Ruminococcaceae_UCG-013;s__
Otu000625	1	4	8	8	9	0	4	3	0	6	2	4	4	2	2	1	1	1	k__Bacteria;p__Firmicutes;c__Clostridia;o__Clostridiales;f__Peptococcaceae
Otu000626	4	1	18	0	0	0	0	0	6	0	24	7	0	0	0	0	0	0	k__Bacteria;p__Tenericutes;c__Mollicutes;o__Mollicutes_RF39;f__;g__;s__
Otu000627	0	2	7	0	1	1	4	0	7	8	14	5	3	0	0	2	1	4	k__Bacteria;p__Acidobacteria;c__Subgroup_6;o__;f__;g__;s__
Otu000628	8	7	0	3	1	2	1	4	0	4	3	0	3	1	12	3	5	2	k__Bacteria;p__Bacteroidetes;c__Bacteroidia;o__Bacteroidales;f__Muribaculaceae;g__;s__
Otu000629	1	1	2	0	5	2	3	1	7	6	4	3	6	0	6	1	5	6	k__Bacteria;p__Bacteroidetes;c__Bacteroidia;o__Bacteroidales;f__Muribaculaceae
Otu000630	3	0	11	2	1	0	4	1	0	12	1	3	2	4	1	9	1	4	k__Bacteria;p__Bacteroidetes;c__Bacteroidia;o__Bacteroidales;f__Muribaculaceae;g__;s__
Otu000631	1	1	4	0	21	1	0	1	2	2	2	3	3	12	2	3	0	0	k__Bacteria;p__Firmicutes;c__Clostridia;o__Clostridiales;f__Family_XIII;g__Family_XIII_UCG-001;s__
Otu000632	4	8	2	4	3	4	1	1	3	0	2	2	7	4	3	3	6	1	k__Bacteria;p__Bacteroidetes;c__Bacteroidia;o__Bacteroidales;f__Muribaculaceae;g__;s__
Otu000633	7	5	1	2	2	2	1	0	1	8	5	2	2	5	1	7	5	2	k__Bacteria;p__Bacteroidetes;c__Bacteroidia;o__Bacteroidales;f__Muribaculaceae;g__;s__
Otu000634	3	5	0	0	0	3	2	1	14	5	11	9	5	0	0	0	0	0	k__Bacteria;p__Acidobacteria;c__Holophagae;o__Subgroup_7;f__;g__;s__
Otu000635	1	0	3	8	3	0	0	1	0	0	27	7	4	1	1	2	0	0	k__Bacteria;p__Firmicutes;c__Clostridia;o__Clostridiales;f__Ruminococcaceae
Otu000636	11	2	3	9	2	4	8	6	0	0	0	0	2	1	6	1	2	1	k__Bacteria;p__Bacteroidetes;c__Bacteroidia;o__Bacteroidales;f__Rikenellaceae;g__Alistipes
Otu000637	7	0	0	0	0	0	8	0	0	18	0	9	1	0	0	14	0	0	k__Bacteria;p__Firmicutes;c__Clostridia;o__Clostridiales;f__Lachnospiraceae;g__Lachnospiraceae_NK4A136_group
Otu000638	1	8	10	3	0	0	1	2	0	0	6	2	5	7	2	5	5	0	k__Bacteria;p__Firmicutes;c__Clostridia;o__Clostridiales;f__Christensenellaceae;g__;s__
Otu000639	0	2	0	9	4	1	0	0	0	0	0	7	34	0	0	0	0	0	k__Bacteria;p__Firmicutes;c__Clostridia;o__Clostridiales;f__Ruminococcaceae;g__Anaerotruncus
Otu000640	4	6	0	2	0	2	1	0	0	9	0	0	15	4	2	2	5	5	k__Bacteria;p__Firmicutes;c__Clostridia;o__Clostridiales;f__Ruminococcaceae
Otu000641	2	6	2	1	0	1	0	2	13	4	15	1	4	0	0	2	0	4	k__Bacteria;p__Acidobacteria;c__Blastocatellia_Subgroup_4;o__Blastocatellales;f__Blastocatellaceae;g__Stenotrophobacter;s__
Otu000642	2	3	0	0	1	4	2	2	10	3	11	4	5	4	0	3	0	3	k__Bacteria;p__Proteobacteria;c__Deltaproteobacteria
Otu000643	3	0	8	2	6	1	2	6	8	0	8	8	0	0	3	1	0	1	k__Bacteria;p__Firmicutes;c__Clostridia;o__Clostridiales;f__Ruminococcaceae;g__Intestinimonas
Otu000644	3	3	1	2	5	2	0	4	19	0	9	3	5	0	0	0	0	0	k__Bacteria;p__Gemmatimonadetes;c__Longimicrobia;o__Longimicrobiales;f__Longimicrobiaceae;g__;s__
Otu000645	2	1	3	0	3	5	3	0	10	3	12	6	7	0	0	0	0	1	k__Bacteria;p__Acidobacteria;c__Thermoanaerobaculia;o__Thermoanaerobaculales;f__Thermoanaerobaculaceae;g__Subgroup_10
Otu000646	1	5	1	0	2	3	5	2	10	9	5	7	4	2	0	0	0	0	k__Bacteria;p__Proteobacteria;c__Alphaproteobacteria;o__Reyranellales;f__Reyranellaceae;g__Reyranella;s__
Otu000647	1	12	0	0	0	0	0	25	16	0	0	0	0	0	0	0	0	2	k__Bacteria;p__Firmicutes;c__Clostridia;o__Clostridiales;f__Lachnospiraceae;g__Lachnospiraceae_NK4A136_group;s__
Otu000648	2	6	3	4	1	3	2	1	7	0	1	3	1	6	2	5	5	4	k__Bacteria;p__Bacteroidetes;c__Bacteroidia;o__Bacteroidales;f__Muribaculaceae;g__;s__
Otu000649	2	6	3	2	0	4	0	2	0	3	5	2	1	8	2	4	9	3	k__Bacteria;p__Bacteroidetes;c__Bacteroidia;o__Bacteroidales;f__Muribaculaceae;g__;s__
Otu000650	5	6	1	0	0	3	0	1	14	11	7	4	3	0	0	0	0	0	k__Bacteria;p__Proteobacteria;c__Gammaproteobacteria;o__Xanthomonadales;f__Rhodanobacteraceae;g__Dokdonella
Otu000651	1	0	5	0	1	3	0	0	10	6	13	0	2	11	0	0	0	2	k__Bacteria;p__Proteobacteria;c__Gammaproteobacteria;o__Xanthomonadales;f__Xanthomonadaceae;g__Arenimonas;s__
Otu000652	5	9	4	0	9	4	6	0	0	0	0	4	1	6	1	0	0	5	k__Bacteria;p__Firmicutes;c__Clostridia;o__Clostridiales;f__Peptococcaceae;g__;s__
Otu000653	1	4	3	0	1	0	1	0	9	8	11	0	5	4	2	0	1	3	k__Bacteria;p__Acidobacteria;c__Subgroup_6;o__;f__;g__;s__
Otu000654	3	2	1	2	3	4	3	0	5	3	0	4	6	1	5	0	8	3	k__Bacteria;p__Bacteroidetes;c__Bacteroidia;o__Bacteroidales;f__Muribaculaceae;g__;s__
Otu000655	0	3	1	1	2	3	2	0	0	5	6	1	4	7	3	5	8	2	k__Bacteria;p__Bacteroidetes;c__Bacteroidia;o__Bacteroidales;f__Muribaculaceae;g__;s__
Otu000656	3	0	5	3	0	4	4	0	0	3	3	3	5	7	0	8	2	3	k__Bacteria;p__Bacteroidetes;c__Bacteroidia;o__Bacteroidales;f__Muribaculaceae;g__;s__
Otu000657	0	4	4	10	4	8	2	0	3	2	6	4	0	3	0	3	0	0	k__Bacteria;p__Firmicutes;c__Bacilli;o__Lactobacillales;f__Lactobacillaceae;g__Lactobacillus
Otu000658	1	1	0	0	6	6	3	0	0	5	0	0	2	7	4	0	6	12	k__Bacteria;p__Firmicutes;c__Clostridia;o__Clostridiales;f__Ruminococcaceae
Otu000659	2	1	6	0	1	5	1	1	6	2	12	3	3	1	0	1	6	2	k__Bacteria;p__Firmicutes;c__Bacilli;o__Bacillales;f__Bacillaceae;g__Bacillus
Otu000660	0	0	0	0	51	0	0	0	1	0	0	0	0	1	0	0	0	0	k__Bacteria;p__Firmicutes;c__Clostridia;o__Clostridiales;f__Lachnospiraceae;g__A2
Otu000661	4	0	3	5	7	7	0	1	2	1	0	0	4	8	0	9	1	0	k__Bacteria;p__Firmicutes;c__Clostridia;o__Clostridiales;f__Lachnospiraceae
Otu000662	3	1	1	0	1	5	6	16	0	0	0	5	1	2	3	0	5	3	k__Bacteria;p__Firmicutes;c__Clostridia;o__Clostridiales;f__Ruminococcaceae;g__Ruminococcaceae_NK4A214_group;s__Lachnospiraceae_bacterium_19gly4
Otu000663	0	2	0	4	11	0	0	0	0	0	1	0	25	0	0	9	0	0	k__Bacteria;p__Firmicutes;c__Clostridia;o__Clostridiales;f__Lachnospiraceae
Otu000664	0	24	2	0	3	0	5	0	0	0	0	1	0	11	1	3	2	0	k__Bacteria;p__Firmicutes;c__Clostridia;o__Clostridiales;f__Lachnospiraceae
Otu000665	0	0	0	0	9	0	0	0	0	0	0	0	0	8	15	20	0	0	k__Bacteria;p__Firmicutes;c__Clostridia;o__Clostridiales;f__Lachnospiraceae
Otu000666	1	2	6	0	1	1	1	0	0	8	0	4	9	6	1	4	4	3	k__Bacteria;p__Bacteroidetes;c__Bacteroidia;o__Bacteroidales;f__Muribaculaceae;g__;s__
Otu000667	3	3	5	0	1	2	2	2	20	1	5	2	2	1	0	0	2	0	k__Bacteria;p__Proteobacteria;c__Alphaproteobacteria;o__Rhizobiales;f__Xanthobacteraceae
Otu000668	1	3	2	0	5	1	1	1	11	1	6	4	4	4	1	0	3	3	k__Bacteria;p__Proteobacteria;c__Gammaproteobacteria;o__Enterobacteriales;f__Enterobacteriaceae
Otu000669	3	2	2	1	0	5	3	2	15	2	5	2	4	3	0	0	0	2	k__Bacteria;p__Proteobacteria;c__Gammaproteobacteria;o__Betaproteobacteriales;f__SC-I-84;g__;s__
Otu000670	3	2	0	0	0	1	3	1	0	7	4	1	7	4	2	11	4	1	k__Bacteria;p__Bacteroidetes;c__Bacteroidia;o__Bacteroidales;f__Muribaculaceae
Otu000671	0	1	0	1	0	1	0	2	0	0	26	20	0	0	0	0	0	0	k__Bacteria;p__Firmicutes;c__Clostridia;o__Clostridiales;f__Ruminococcaceae
Otu000672	4	4	2	2	5	0	0	1	0	3	22	0	1	4	1	2	0	0	k__Bacteria;p__Firmicutes;c__Clostridia;o__Clostridiales;f__Ruminococcaceae
Otu000673	1	0	16	0	4	2	0	0	0	2	5	9	2	3	4	3	0	0	k__Bacteria;p__Firmicutes;c__Clostridia;o__Clostridiales;f__Ruminococcaceae
Otu000674	1	0	0	0	40	2	0	0	0	0	0	0	4	4	0	0	0	0	k__Bacteria;p__Firmicutes;c__Clostridia;o__Clostridiales;f__Ruminococcaceae;g__Eubacterium_coprostanoligenes_group;s__
Otu000675	2	3	1	0	0	2	1	2	14	9	6	1	8	0	1	0	0	0	k__Bacteria;p__Tenericutes;c__Mollicutes;o__Mycoplasmatales;f__Mycoplasmataceae
Otu000676	1	2	2	3	0	1	3	0	10	1	8	3	7	7	1	0	1	0	k__Bacteria;p__Proteobacteria;c__Alphaproteobacteria;o__Caulobacterales;f__Caulobacteraceae;g__Phenylobacterium;s__
Otu000677	1	5	6	0	1	0	14	0	0	0	14	1	0	7	0	0	0	1	k__Bacteria;p__Firmicutes;c__Clostridia;o__Clostridiales;f__Lachnospiraceae
Otu000678	1	5	5	0	1	0	5	5	9	2	6	2	4	1	0	0	1	3	k__Bacteria;p__Gemmatimonadetes;c__AKAU4049;o__;f__;g__;s__
Otu000679	1	2	1	4	2	2	3	0	0	4	1	2	3	2	3	14	3	3	k__Bacteria;p__Bacteroidetes;c__Bacteroidia;o__Bacteroidales;f__Muribaculaceae;g__;s__
Otu000680	0	5	0	5	3	14	0	4	6	0	5	1	3	1	0	2	1	0	k__Bacteria;p__Firmicutes;c__Clostridia;o__Clostridiales;f__Lachnospiraceae;g__Acetatifactor;s__Clostridiales_bacterium_CIEAF_015
Otu000681	20	0	0	0	0	0	0	4	0	0	0	0	19	3	0	2	2	0	k__Bacteria;p__Tenericutes;c__Mollicutes;o__Mollicutes_RF39;f__;g__;s__
Otu000682	6	0	6	0	24	0	0	0	2	0	0	1	0	8	1	0	0	1	k__Bacteria;p__Firmicutes;c__Clostridia;o__Clostridiales;f__Lachnospiraceae
Otu000683	0	5	6	0	5	1	2	9	5	0	6	2	2	0	2	4	0	0	k__Bacteria;p__Firmicutes;c__Clostridia;o__Clostridiales;f__Clostridiales_vadinBB60_group;g__;s__
Otu000684	0	1	1	1	14	2	0	3	3	14	0	1	0	1	1	6	1	0	k__Bacteria;p__Firmicutes;c__Clostridia;o__Clostridiales;f__Lachnospiraceae
Otu000685	0	13	1	0	3	0	0	23	3	3	0	0	0	1	2	0	0	0	k__Bacteria;p__Firmicutes;c__Clostridia;o__Clostridiales;f__Lachnospiraceae
Otu000686	2	4	1	1	4	1	0	1	15	5	7	2	1	3	0	0	0	2	k__Bacteria;p__Acidobacteria;c__Subgroup_6
Otu000687	3	4	1	0	1	2	6	2	10	3	9	0	5	2	0	0	1	0	k__Bacteria;p__Proteobacteria;c__Gammaproteobacteria;o__Betaproteobacteriales;f__Nitrosomonadaceae;g__MND1;s__
Otu000688	2	3	0	0	1	3	1	1	13	2	7	2	9	4	0	0	0	1	k__Bacteria;p__Proteobacteria;c__Gammaproteobacteria;o__Betaproteobacteriales;f__SC-I-84;g__;s__
Otu000689	1	0	0	0	0	30	12	0	0	2	0	1	0	1	0	0	0	1	k__Bacteria;p__Firmicutes;c__Clostridia;o__Clostridiales;f__Ruminococcaceae
Otu000690	0	0	0	0	1	0	0	0	6	13	0	13	0	4	0	11	0	0	k__Bacteria;p__Firmicutes;c__Clostridia;o__Clostridiales;f__Lachnospiraceae
Otu000691	0	0	0	0	8	0	0	0	1	0	0	30	1	5	0	3	0	0	k__Bacteria;p__Firmicutes;c__Clostridia;o__Clostridiales;f__Lachnospiraceae;g__Lachnospiraceae_NK4A136_group
Otu000692	0	4	0	0	0	9	0	21	0	0	1	0	0	13	0	0	0	0	k__Bacteria;p__Firmicutes;c__Clostridia;o__Clostridiales;f__Lachnospiraceae
Otu000693	5	1	0	0	4	0	3	1	18	1	6	2	3	0	0	1	2	1	k__Bacteria;p__Acidobacteria;c__Thermoanaerobaculia;o__Thermoanaerobaculales;f__Thermoanaerobaculaceae;g__Subgroup_10
Otu000694	0	0	0	0	0	0	0	48	0	0	0	0	0	0	0	0	0	0	k__Bacteria;p__Firmicutes;c__Clostridia;o__Clostridiales;f__Ruminococcaceae
Otu000695	1	5	3	2	1	1	2	3	11	4	2	5	6	1	0	0	0	1	k__Bacteria;p__Proteobacteria;c__Gammaproteobacteria;o__Betaproteobacteriales;f__Nitrosomonadaceae;g__MND1;s__
Otu000696	0	0	0	0	0	0	0	1	0	0	0	0	0	0	0	3	43	0	k__Bacteria;p__Firmicutes;c__Clostridia;o__Clostridiales;f__Ruminococcaceae;g__Ruminococcaceae_UCG-014;s__
Otu000697	8	3	1	1	1	1	1	0	21	1	2	1	6	0	0	0	0	0	k__Bacteria;p__Actinobacteria;c__Actinobacteria;o__Streptomycetales;f__Streptomycetaceae;g__Streptomyces
Otu000698	2	1	5	0	0	0	1	3	6	4	8	1	15	0	0	1	0	0	k__Bacteria;p__Proteobacteria;c__Gammaproteobacteria;o__Betaproteobacteriales;f__TRA3-20;g__;s__
Otu000699	2	2	3	1	0	1	0	1	16	3	6	2	4	1	0	0	2	3	k__Bacteria;p__Proteobacteria;c__Gammaproteobacteria;o__Betaproteobacteriales;f__SC-I-84;g__;s__
Otu000700	2	5	5	0	4	1	1	0	0	4	0	15	0	2	1	0	3	4	k__Bacteria;p__Firmicutes;c__Clostridia;o__Clostridiales;f__Ruminococcaceae
Otu000701	4	4	0	3	1	1	4	2	3	3	0	2	5	4	3	0	7	1	k__Bacteria;p__Bacteroidetes;c__Bacteroidia;o__Bacteroidales;f__Muribaculaceae;g__;s__
Otu000702	0	5	5	0	0	1	2	1	12	11	4	2	4	0	0	0	0	0	k__Bacteria;p__Proteobacteria;c__Alphaproteobacteria;o__Rhodovibrionales;f__Kiloniellaceae;g__Pelagibius;s__
Otu000703	3	2	0	0	0	1	1	1	8	3	17	3	0	4	0	1	1	2	k__Bacteria;p__Acidobacteria;c__Subgroup_6
Otu000704	10	4	3	2	4	1	0	1	0	0	0	2	9	2	0	1	4	3	k__Bacteria;p__Firmicutes;c__Clostridia;o__Clostridiales;f__Family_XIII;g__Family_XIII_AD3011_group;s__
Otu000705	0	2	6	4	1	4	0	0	0	2	0	0	3	0	4	11	5	4	k__Bacteria;p__Firmicutes;c__Clostridia;o__Clostridiales;f__Ruminococcaceae;g__Eubacterium_coprostanoligenes_group
Otu000706	0	11	0	0	0	2	0	21	0	0	0	0	0	2	1	0	2	7	k__Bacteria;p__Firmicutes;c__Clostridia;o__Clostridiales;f__Ruminococcaceae;g__Ruminococcaceae_UCG-014;s__
Otu000707	0	7	5	3	4	1	1	1	7	0	1	0	6	8	0	1	1	0	k__Bacteria;p__Firmicutes;c__Clostridia;o__Clostridiales;f__Lachnospiraceae
Otu000708	2	2	3	1	2	4	2	4	4	4	0	2	5	2	2	0	1	6	k__Bacteria;p__Bacteroidetes;c__Bacteroidia;o__Bacteroidales;f__Muribaculaceae
Otu000709	3	3	1	2	4	1	0	3	2	3	1	3	1	7	2	7	3	0	k__Bacteria;p__Bacteroidetes;c__Bacteroidia;o__Bacteroidales;f__Muribaculaceae;g__;s__
Otu000710	0	0	0	0	11	0	0	0	9	0	0	0	0	5	2	19	0	0	k__Bacteria;p__Firmicutes;c__Clostridia;o__Clostridiales;f__Lachnospiraceae;g__Acetivibrio_ethanolgignens_group;s__
Otu000711	1	4	2	1	1	3	1	1	10	2	8	3	6	2	0	0	0	0	k__Bacteria;p__Proteobacteria;c__Gammaproteobacteria;o__Betaproteobacteriales;f__Nitrosomonadaceae;g__mle1-7;s__
Otu000712	0	0	0	0	13	2	0	0	0	0	1	0	15	8	1	5	0	0	k__Bacteria;p__Firmicutes;c__Clostridia;o__Clostridiales;f__Ruminococcaceae;g__Ruminiclostridium_5
Otu000713	3	2	1	0	1	1	1	1	16	0	4	6	6	0	0	0	1	1	k__Bacteria;p__Proteobacteria;c__Alphaproteobacteria;o__Sphingomonadales;f__Sphingomonadaceae;g__Altererythrobacter
Otu000714	3	2	2	2	2	3	1	0	2	4	1	3	8	1	3	0	5	2	k__Bacteria;p__Bacteroidetes;c__Bacteroidia;o__Bacteroidales
Otu000715	0	1	7	4	0	4	3	0	0	2	1	0	1	3	1	15	0	2	k__Bacteria;p__Bacteroidetes;c__Bacteroidia;o__Bacteroidales;f__Muribaculaceae
Otu000716	1	1	2	1	0	2	0	2	6	3	9	6	3	4	1	1	0	2	k__Bacteria;p__Acidobacteria;c__Subgroup_6;o__;f__;g__;s__
Otu000717	5	0	2	0	0	1	3	3	16	1	8	0	5	0	0	0	0	0	k__Bacteria;p__Gemmatimonadetes;c__Gemmatimonadetes;o__Gemmatimonadales;f__Gemmatimonadaceae;g__;s__
Otu000718	2	2	3	5	1	2	8	1	4	2	1	5	3	1	1	1	2	0	k__Bacteria;p__Bacteroidetes;c__Bacteroidia;o__Bacteroidales;f__Muribaculaceae;g__;s__
Otu000719	0	4	2	11	3	0	1	0	1	0	0	11	6	0	2	0	0	3	k__Bacteria;p__Firmicutes;c__Clostridia;o__Clostridiales;f__Christensenellaceae;g__Christensenellaceae_R-7_group;s__
Otu000720	2	7	1	0	1	2	2	0	11	3	10	1	1	1	0	0	0	2	k__Bacteria;p__Proteobacteria;c__Alphaproteobacteria;o__Rhizobiales;f__Devosiaceae
Otu000721	0	0	21	0	0	0	0	4	0	0	0	2	0	3	4	0	10	0	k__Bacteria;p__Tenericutes;c__Mollicutes;o__Mollicutes_RF39
Otu000722	0	2	0	0	3	2	6	0	0	4	0	1	0	25	0	0	0	1	k__Bacteria;p__Firmicutes;c__Clostridia;o__Clostridiales;f__Lachnospiraceae
Otu000723	6	3	4	1	1	3	5	2	2	1	1	5	1	2	2	3	1	1	k__Bacteria;p__Bacteroidetes;c__Bacteroidia;o__Bacteroidales;f__Muribaculaceae
Otu000724	1	1	2	6	0	7	0	1	3	3	1	2	2	2	4	3	4	2	k__Bacteria;p__Bacteroidetes;c__Bacteroidia;o__Bacteroidales;f__Muribaculaceae
Otu000725	1	0	1	2	0	1	7	3	1	3	1	1	0	1	7	3	8	3	k__Bacteria;p__Bacteroidetes;c__Bacteroidia;o__Bacteroidales;f__Muribaculaceae;g__;s__
Otu000726	0	0	0	12	6	0	0	0	0	0	0	0	9	0	0	14	2	0	k__Bacteria;p__Firmicutes;c__Clostridia;o__Clostridiales;f__Ruminococcaceae;g__Ruminococcaceae_UCG-014;s__
Otu000727	4	4	4	2	1	3	3	0	2	3	0	4	5	1	4	0	2	1	k__Bacteria;p__Bacteroidetes;c__Bacteroidia;o__Bacteroidales;f__Tannerellaceae;g__Macellibacteroides;s__bacterium_enrichment_culture_clone_BA32
Otu000728	1	3	3	1	0	1	2	0	9	3	13	2	5	0	0	0	0	0	k__Bacteria;p__Proteobacteria;c__Gammaproteobacteria;o__Betaproteobacteriales;f__SC-I-84;g__;s__
Otu000729	0	0	0	0	6	13	0	0	0	0	0	0	0	0	2	0	16	6	k__Bacteria;p__Firmicutes;c__Erysipelotrichia;o__Erysipelotrichales;f__Erysipelotrichaceae;g__Clostridium_innocuum_group;s__
Otu000730	0	5	2	1	0	0	2	0	11	3	7	2	7	0	0	0	0	3	k__Bacteria;p__Proteobacteria;c__Gammaproteobacteria;o__Salinisphaerales;f__Solimonadaceae;g__Panacagrimonas;s__
Otu000731	4	0	4	1	1	1	3	0	0	4	3	0	7	6	2	5	1	1	k__Bacteria;p__Bacteroidetes;c__Bacteroidia;o__Bacteroidales;f__Muribaculaceae;g__;s__
Otu000732	0	3	3	0	1	0	0	1	8	1	12	3	5	2	0	1	0	3	k__Bacteria;p__Proteobacteria;c__Gammaproteobacteria;o__Betaproteobacteriales;f__Burkholderiaceae
Otu000733	0	0	0	0	8	0	0	3	0	0	0	0	0	17	0	2	6	6	k__Bacteria;p__Tenericutes;c__Mollicutes;o__Mollicutes_RF39;f__;g__;s__
Otu000734	0	3	5	4	1	9	1	0	2	2	9	1	0	1	0	3	1	0	k__Bacteria;p__Firmicutes;c__Bacilli;o__Lactobacillales;f__Lactobacillaceae;g__Lactobacillus
Otu000735	5	4	0	0	4	1	3	1	1	2	0	2	1	1	5	8	1	3	k__Bacteria;p__Bacteroidetes;c__Bacteroidia;o__Bacteroidales;f__Muribaculaceae;g__;s__
Otu000736	3	0	1	1	2	1	0	0	7	2	12	6	1	2	0	1	0	3	k__Bacteria;p__Rokubacteria;c__NC10;o__Rokubacteriales;f__;g__;s__
Otu000737	4	0	3	2	4	4	2	0	0	11	0	8	1	0	0	0	1	2	k__Bacteria;p__Firmicutes;c__Clostridia;o__Clostridiales;f__Ruminococcaceae;g__Ruminococcaceae_UCG-013;s__
Otu000738	2	5	1	1	1	0	4	0	16	3	4	2	3	0	0	0	0	0	k__Bacteria;p__Chloroflexi;c__Anaerolineae;o__Anaerolineales;f__Anaerolineaceae;g__Anaerolinea;s__
Otu000739	0	0	0	0	2	0	6	0	0	0	0	0	0	0	0	3	31	0	k__Bacteria;p__Tenericutes;c__Mollicutes;o__Mollicutes_RF39;f__;g__;s__
Otu000740	0	1	15	3	4	1	0	0	0	0	0	0	0	0	5	5	2	6	k__Bacteria;p__Firmicutes;c__Clostridia;o__Clostridiales;f__Ruminococcaceae;g__Eubacterium_coprostanoligenes_group
Otu000741	1	3	2	1	9	4	1	2	1	0	4	0	1	3	1	4	0	5	k__Bacteria;p__Firmicutes;c__Clostridia;o__Clostridiales;f__Lachnospiraceae;g__Lachnoclostridium
Otu000742	0	0	0	0	0	0	10	0	0	0	0	0	0	0	0	14	13	4	k__Bacteria;p__Bacteroidetes;c__Bacteroidia;o__Bacteroidales;f__Muribaculaceae
Otu000743	7	2	1	3	16	3	1	0	0	0	0	2	2	0	0	0	0	4	k__Bacteria;p__Firmicutes;c__Clostridia;o__Clostridiales;f__Ruminococcaceae;g__Intestinimonas;s__Intestinimonas_butyriciproducens
Otu000744	2	3	5	0	1	0	0	2	6	2	11	1	4	3	0	0	0	1	k__Bacteria;p__Proteobacteria;c__Gammaproteobacteria;o__Betaproteobacteriales;f__SC-I-84;g__;s__
Otu000745	0	0	0	0	14	0	0	1	1	0	0	0	0	1	13	7	4	0	k__Bacteria;p__Firmicutes;c__Clostridia;o__Clostridiales;f__Lachnospiraceae
Otu000746	5	5	0	4	1	2	0	0	0	2	1	2	1	6	1	8	1	2	k__Bacteria;p__Bacteroidetes;c__Bacteroidia;o__Bacteroidales;f__Muribaculaceae;g__;s__
Otu000747	1	2	1	1	0	0	2	4	11	2	8	3	6	0	0	0	0	0	k__Bacteria;p__Proteobacteria;c__Alphaproteobacteria;o__Caulobacterales;f__Caulobacteraceae;g__;s__
Otu000748	0	1	0	0	5	4	0	0	0	0	0	1	0	9	0	12	7	1	k__Bacteria;p__Tenericutes;c__Mollicutes;o__Mollicutes_RF39;f__;g__;s__
Otu000749	2	3	0	2	3	0	1	1	14	2	8	0	3	1	0	0	0	0	k__Bacteria;p__Proteobacteria;c__Gammaproteobacteria;o__Betaproteobacteriales;f__Rhodocyclaceae;g__Thauera
Otu000750	2	1	1	4	1	0	5	0	0	4	0	7	5	1	1	0	3	5	k__Bacteria;p__Firmicutes;c__Clostridia;o__Clostridiales;f__Ruminococcaceae
Otu000751	1	1	5	3	7	1	2	4	3	0	6	4	3	0	0	0	0	0	k__Bacteria;p__Firmicutes;c__Clostridia;o__Clostridiales;f__Lachnospiraceae;g__Lachnospiraceae_UCG-006;s__
Otu000752	0	18	0	0	0	0	0	1	1	0	0	1	0	7	0	6	0	6	k__Bacteria;p__Tenericutes;c__Mollicutes;o__Mollicutes_RF39;f__;g__;s__
Otu000753	2	3	0	3	2	0	0	0	0	6	0	3	4	8	0	1	6	2	k__Bacteria;p__Firmicutes;c__Clostridia;o__Clostridiales;f__Ruminococcaceae
Otu000754	2	5	1	0	2	0	3	2	6	9	6	1	2	1	0	0	0	0	k__Bacteria;p__Acidobacteria;c__Subgroup_6;o__Acidobacteria_bacterium_SCN_69-37;f__;g__;s__
Otu000755	3	0	2	0	0	0	4	17	12	0	0	0	0	0	0	0	0	2	k__Bacteria;p__Firmicutes;c__Clostridia;o__Clostridiales;f__Lachnospiraceae
Otu000756	3	1	1	0	0	0	3	2	9	4	7	1	2	0	0	1	0	6	k__Bacteria;p__Proteobacteria;c__Gammaproteobacteria;o__Betaproteobacteriales;f__SC-I-84;g__;s__
Otu000757	2	7	0	0	0	1	1	4	16	2	4	2	1	0	0	0	0	0	k__Bacteria;p__Bacteroidetes;c__Bacteroidia;o__Cytophagales;f__Microscillaceae
Otu000758	4	2	0	0	1	0	2	2	6	6	8	1	8	0	0	0	0	0	k__Bacteria;p__Firmicutes;c__Clostridia;o__Clostridiales;f__Peptostreptococcaceae;g__Terrisporobacter;s__
Otu000759	3	2	2	4	2	3	1	6	0	3	0	0	3	1	0	4	4	2	k__Bacteria;p__Bacteroidetes;c__Bacteroidia;o__Bacteroidales;f__Rikenellaceae;g__Alistipes
Otu000760	1	0	10	4	3	0	0	1	0	2	3	9	3	0	0	2	1	1	k__Bacteria;p__Firmicutes;c__Clostridia;o__Clostridiales;f__Ruminococcaceae;g__Ruminiclostridium_5
Otu000761	1	6	0	3	1	1	0	0	2	3	1	1	0	4	3	7	5	1	k__Bacteria;p__Bacteroidetes;c__Bacteroidia;o__Bacteroidales;f__Muribaculaceae
Otu000762	0	3	0	0	0	0	1	0	0	4	4	0	3	4	3	7	7	3	k__Bacteria;p__Bacteroidetes;c__Bacteroidia;o__Bacteroidales;f__Muribaculaceae;g__;s__
Otu000763	5	4	2	3	1	1	1	0	2	0	0	2	1	4	4	4	3	2	k__Bacteria;p__Bacteroidetes;c__Bacteroidia;o__Bacteroidales;f__Muribaculaceae;g__;s__
Otu000764	4	1	0	1	3	1	1	0	15	1	2	1	3	1	0	0	2	3	k__Bacteria;p__Proteobacteria;c__Alphaproteobacteria;o__Sphingomonadales;f__Sphingomonadaceae;g__Novosphingobium
Otu000765	11	1	0	0	9	1	4	0	0	1	0	0	0	9	0	0	0	3	k__Bacteria;p__Firmicutes;c__Clostridia;o__Clostridiales;f__Ruminococcaceae;g__Ruminococcaceae_UCG-010;s__
Otu000766	10	3	2	0	3	0	3	0	0	0	0	5	0	0	0	0	0	13	k__Bacteria;p__Firmicutes;c__Clostridia;o__Clostridiales;f__Ruminococcaceae;g__Ruminococcaceae_UCG-010;s__
Otu000767	0	5	2	3	3	2	1	0	2	3	0	0	4	0	2	1	6	5	k__Bacteria;p__Bacteroidetes;c__Bacteroidia;o__Bacteroidales;f__Muribaculaceae;g__;s__
Otu000768	3	7	1	0	0	0	3	0	9	4	5	1	4	0	0	0	0	2	k__Bacteria;p__Actinobacteria;c__Actinobacteria;o__Micrococcales;f__Microbacteriaceae
Otu000769	0	26	1	0	1	0	4	0	0	0	0	0	0	0	0	0	0	7	k__Bacteria;p__Firmicutes;c__Clostridia;o__Clostridiales;f__Ruminococcaceae;g__Ruminococcaceae_UCG-010;s__
Otu000770	0	0	0	0	2	0	0	0	0	0	0	0	0	3	0	17	17	0	k__Bacteria;p__Tenericutes;c__Mollicutes;o__Mollicutes_RF39;f__;g__;s__
Otu000771	4	0	2	8	0	1	1	9	0	3	0	2	1	1	1	3	2	0	k__Bacteria;p__Bacteroidetes;c__Bacteroidia;o__Bacteroidales;f__Rikenellaceae;g__Alistipes
Otu000772	0	0	5	0	5	2	0	0	0	5	0	0	2	0	4	6	1	8	k__Bacteria;p__Firmicutes;c__Clostridia;o__Clostridiales;f__Ruminococcaceae;g__Eubacterium_coprostanoligenes_group
Otu000773	0	0	0	0	1	1	5	0	0	6	1	4	0	1	0	18	0	1	k__Bacteria;p__Firmicutes;c__Clostridia;o__Clostridiales;f__Ruminococcaceae;g__Eubacterium_coprostanoligenes_group
Otu000774	0	1	2	0	0	1	3	3	3	1	4	0	1	3	0	7	3	6	k__Bacteria;p__Proteobacteria;c__Alphaproteobacteria;o__Sphingomonadales;f__Sphingomonadaceae;g__Sphingobium
Otu000775	0	1	0	0	0	0	4	0	9	3	17	0	1	0	1	1	0	1	k__Bacteria;p__Acidobacteria;c__Subgroup_6;o__;f__;g__;s__
Otu000776	0	1	0	2	0	1	1	21	0	1	0	0	7	2	0	0	0	2	k__Bacteria;p__Firmicutes;c__Clostridia;o__Clostridiales;f__Ruminococcaceae
Otu000777	0	0	1	0	5	9	0	3	0	1	5	2	4	1	6	1	0	0	k__Bacteria;p__Firmicutes;c__Clostridia;o__Clostridiales;f__Ruminococcaceae
Otu000778	2	2	2	0	0	2	1	0	16	1	4	1	4	1	0	0	1	1	k__Bacteria;p__Actinobacteria;c__Actinobacteria;o__Streptomycetales;f__Streptomycetaceae;g__Streptomyces
Otu000779	2	1	2	0	0	2	3	1	10	2	11	1	3	0	0	0	0	0	k__Bacteria;p__Acidobacteria;c__Acidobacteriia;o__Solibacterales;f__Solibacteraceae_Subgroup_3;g__Bryobacter;s__
Otu000780	3	1	1	1	1	3	4	1	2	6	0	0	0	1	4	0	6	4	k__Bacteria;p__Bacteroidetes;c__Bacteroidia;o__Bacteroidales;f__Muribaculaceae
Otu000781	0	0	0	1	0	3	0	1	6	5	10	2	6	1	0	1	1	1	k__Bacteria;p__Acidobacteria;c__Subgroup_6;o__;f__;g__;s__
Otu000782	2	2	1	0	0	1	0	3	13	2	8	3	2	0	0	0	0	0	k__Bacteria;p__Proteobacteria;c__Gammaproteobacteria;o__Xanthomonadales;f__Xanthomonadaceae;g__Luteimonas;s__Luteimonas_sp
Otu000783	1	1	0	1	8	0	0	0	0	4	9	8	0	1	2	2	0	0	k__Bacteria;p__Firmicutes;c__Clostridia;o__Clostridiales;f__Lachnospiraceae
Otu000784	0	1	0	0	1	1	2	1	14	2	3	1	2	3	1	0	3	2	k__Bacteria;p__Acidobacteria;c__Subgroup_6;o__;f__;g__;s__
Otu000785	4	3	2	0	1	1	3	2	2	2	2	1	3	3	2	2	2	2	k__Bacteria;p__Bacteroidetes;c__Bacteroidia;o__Bacteroidales;f__Muribaculaceae
Otu000786	0	1	1	1	2	1	1	5	11	3	2	1	2	5	0	0	0	1	k__Bacteria;p__Gemmatimonadetes;c__Gemmatimonadetes;o__Gemmatimonadales;f__Gemmatimonadaceae
Otu000787	4	2	1	1	1	3	0	6	8	3	3	1	3	1	0	0	0	0	k__Bacteria;p__Proteobacteria;c__Gammaproteobacteria;o__Betaproteobacteriales;f__Nitrosomonadaceae;g__MND1;s__
Otu000788	0	4	1	1	0	1	4	0	12	0	1	0	4	3	0	2	2	2	k__Bacteria;p__Proteobacteria;c__Gammaproteobacteria;o__Xanthomonadales;f__Xanthomonadaceae;g__Pseudoxanthomonas;s__Pseudoxanthomonas_mexicana
Otu000789	0	1	4	0	4	3	2	5	4	0	1	0	11	1	0	0	0	0	k__Bacteria;p__Firmicutes;c__Clostridia;o__Clostridiales;f__Ruminococcaceae;g__Ruminiclostridium_9;s__Clostridiales_bacterium_CIEAF_019
Otu000790	5	2	3	0	1	1	3	3	0	2	2	1	3	4	3	3	0	0	k__Bacteria;p__Bacteroidetes;c__Bacteroidia;o__Bacteroidales;f__Muribaculaceae
Otu000791	0	0	3	0	0	0	0	0	0	0	0	0	27	2	1	0	3	0	k__Bacteria;p__Firmicutes;c__Clostridia;o__Clostridiales;f__Lachnospiraceae;g__Lachnospiraceae_NK4A136_group;s__
Otu000792	9	0	4	0	0	0	0	2	0	0	0	0	0	10	0	5	0	6	k__Bacteria;p__Firmicutes;c__Clostridia;o__Clostridiales;f__Lachnospiraceae
Otu000793	6	1	0	3	0	1	0	0	0	3	3	3	3	2	4	5	2	0	k__Bacteria;p__Bacteroidetes;c__Bacteroidia;o__Bacteroidales;f__Muribaculaceae
Otu000794	0	0	1	0	0	0	2	2	10	4	6	2	5	0	0	0	0	4	k__Bacteria;p__Chloroflexi;c__Anaerolineae;o__Anaerolineales;f__Anaerolineaceae;g__UTCFX1;s__
Otu000795	5	0	2	1	1	4	2	0	5	5	1	6	3	1	0	0	0	0	k__Bacteria;p__Gemmatimonadetes;c__Gemmatimonadetes;o__Gemmatimonadales;f__Gemmatimonadaceae;g__;s__
Otu000796	8	7	3	2	3	1	2	0	0	2	0	1	5	0	1	0	0	1	k__Bacteria;p__Firmicutes;c__Clostridia;o__Clostridiales
Otu000797	0	0	1	4	2	2	3	5	4	5	0	0	0	1	2	0	6	1	k__Bacteria;p__Bacteroidetes;c__Bacteroidia;o__Bacteroidales;f__Muribaculaceae;g__;s__
Otu000798	14	3	0	0	5	0	1	0	0	0	0	5	1	2	0	0	0	5	k__Bacteria;p__Firmicutes;c__Clostridia;o__Clostridiales;f__Ruminococcaceae
Otu000799	6	4	3	0	2	1	0	0	0	0	0	2	3	5	0	1	4	4	k__Bacteria;p__Firmicutes
Otu000800	5	0	0	1	4	4	1	0	0	0	0	1	6	3	3	2	2	3	k__Bacteria;p__Firmicutes;c__Clostridia;o__Clostridiales;f__Ruminococcaceae
Otu000801	4	2	0	3	5	1	0	10	0	0	1	1	0	2	5	1	0	0	k__Bacteria;p__Bacteroidetes;c__Bacteroidia;o__Bacteroidales;f__Rikenellaceae;g__Alistipes
Otu000802	0	0	0	0	29	0	0	0	0	0	0	0	0	6	0	0	0	0	k__Bacteria;p__Tenericutes;c__Mollicutes;o__Mollicutes_RF39;f__;g__;s__
Otu000803	0	4	2	10	0	0	1	0	1	1	5	4	1	0	0	3	1	2	k__Bacteria;p__Firmicutes;c__Bacilli;o__Lactobacillales;f__Lactobacillaceae;g__Lactobacillus
Otu000804	1	0	2	1	1	3	6	1	4	0	2	5	1	2	1	2	2	1	k__Bacteria;p__Firmicutes;c__Bacilli;o__Bacillales;f__Staphylococcaceae
Otu000805	1	1	1	4	0	5	0	3	6	0	0	1	4	0	2	0	5	2	k__Bacteria;p__Bacteroidetes;c__Bacteroidia;o__Bacteroidales;f__Muribaculaceae;g__;s__
Otu000806	9	0	1	4	4	2	0	0	4	0	3	0	4	1	0	3	0	0	k__Bacteria;p__Firmicutes;c__Clostridia;o__Clostridiales;f__Lachnospiraceae
Otu000807	8	0	0	0	10	0	4	2	0	0	0	2	0	6	3	0	0	0	k__Bacteria;p__Firmicutes;c__Clostridia;o__Clostridiales;f__Ruminococcaceae;g__Ruminococcaceae_UCG-010;s__
Otu000808	3	2	2	1	0	0	0	1	5	3	4	3	4	2	0	1	3	1	k__Bacteria;p__Nitrospirae;c__Nitrospira;o__Nitrospirales;f__Nitrospiraceae;g__Nitrospira
Otu000809	2	1	4	1	0	1	2	3	6	0	0	6	6	1	0	0	0	1	k__Bacteria;p__Actinobacteria;c__Actinobacteria;o__Corynebacteriales;f__Mycobacteriaceae;g__Mycobacterium
Otu000810	0	2	1	0	0	1	1	5	13	1	7	0	2	0	0	1	0	0	k__Bacteria;p__Chloroflexi;c__Chloroflexia;o__Thermomicrobiales;f__AKYG1722;g__;s__
Otu000811	0	4	2	0	0	0	2	0	0	3	4	2	2	3	1	7	1	3	k__Bacteria;p__Bacteroidetes;c__Bacteroidia;o__Bacteroidales;f__Muribaculaceae;g__;s__
Otu000812	0	3	0	0	0	1	2	0	5	1	11	2	6	1	0	1	1	0	k__Bacteria;p__Gemmatimonadetes;c__Gemmatimonadetes;o__Gemmatimonadales;f__Gemmatimonadaceae;g__;s__
Otu000813	0	1	2	5	4	1	2	1	0	0	5	2	3	1	3	1	3	0	k__Bacteria;p__Firmicutes;c__Clostridia;o__Clostridiales;f__Ruminococcaceae
Otu000814	2	2	1	0	1	1	1	1	10	4	4	1	1	0	0	5	0	0	k__Bacteria;p__Gemmatimonadetes;c__Gemmatimonadetes;o__Gemmatimonadales;f__Gemmatimonadaceae;g__;s__
Otu000815	0	0	0	0	0	12	0	2	0	0	0	0	0	14	0	0	6	0	k__Bacteria;p__Firmicutes;c__Clostridia;o__Clostridiales;f__Lachnospiraceae
Otu000816	5	1	1	5	2	3	1	5	1	5	1	1	1	0	0	0	2	0	k__Bacteria;p__Firmicutes;c__Clostridia;o__Clostridiales;f__Lachnospiraceae
Otu000817	0	1	0	0	0	2	0	0	1	0	0	0	28	1	0	0	1	0	k__Bacteria;p__Firmicutes;c__Clostridia;o__Clostridiales;f__Lachnospiraceae;g__Lachnospiraceae_UCG-001;s__
Otu000818	2	2	1	0	2	1	0	0	12	2	8	1	3	0	0	0	0	0	k__Bacteria;p__Gemmatimonadetes;c__Longimicrobia;o__Longimicrobiales;f__Longimicrobiaceae;g__;s__
Otu000819	0	0	0	0	0	0	2	0	0	0	31	0	0	0	0	0	0	0	k__Bacteria;p__Firmicutes;c__Clostridia;o__Clostridiales;f__Ruminococcaceae;g__Ruminiclostridium
Otu000820	0	1	0	0	0	0	0	4	26	0	0	0	2	0	0	0	0	0	k__Bacteria;p__Firmicutes;c__Clostridia;o__Clostridiales;f__Lachnospiraceae;g__Acetatifactor;s__
Otu000821	0	2	2	2	1	2	2	0	4	5	1	0	5	0	2	0	3	2	k__Bacteria;p__Bacteroidetes;c__Bacteroidia;o__Bacteroidales;f__Muribaculaceae;g__;s__
Otu000822	2	1	2	1	0	3	3	1	6	3	0	0	2	1	2	0	4	2	k__Bacteria;p__Bacteroidetes;c__Bacteroidia;o__Bacteroidales;f__Muribaculaceae;g__;s__
Otu000823	1	2	0	0	2	4	2	0	7	3	3	2	6	1	0	0	0	0	k__Bacteria;p__Actinobacteria;c__Actinobacteria;o__Propionibacteriales;f__Nocardioidaceae;g__Nocardioides;s__Nocardioides_sp
Otu000824	3	1	1	2	2	1	1	0	8	1	6	4	2	0	0	1	0	0	k__Bacteria;p__Acidobacteria;c__Subgroup_6;o__Unknown_Order;f__Unknown_Family;g__Luteitalea;s__
Otu000825	0	0	2	0	0	1	1	0	11	5	4	0	4	3	0	0	0	2	k__Bacteria;p__Actinobacteria;c__Actinobacteria;o__Micrococcales;f__Microbacteriaceae;g__Microbacterium
Otu000826	2	1	1	3	0	0	0	10	1	2	1	2	0	2	4	2	2	0	k__Bacteria;p__Bacteroidetes;c__Bacteroidia;o__Bacteroidales;f__Marinifilaceae;g__Odoribacter
Otu000827	7	0	4	0	3	0	2	1	1	1	0	3	3	0	2	2	0	3	k__Bacteria;p__Bacteroidetes;c__Bacteroidia;o__Bacteroidales;f__Muribaculaceae;g__;s__
Otu000828	0	0	0	0	2	0	0	0	13	0	0	0	1	6	3	0	0	7	k__Bacteria;p__Firmicutes;c__Erysipelotrichia;o__Erysipelotrichales;f__Erysipelotrichaceae;g__Ileibacterium;s__Ileibacterium_valens
Otu000829	0	0	0	0	2	0	1	2	7	3	8	5	2	1	0	0	0	1	k__Bacteria;p__Planctomycetes;c__OM190;o__;f__;g__;s__
Otu000830	1	0	9	0	3	0	3	0	0	0	1	0	6	6	1	2	0	0	k__Bacteria;p__Firmicutes;c__Clostridia;o__Clostridiales;f__Ruminococcaceae
Otu000831	4	0	0	0	2	2	1	2	7	0	5	0	1	2	0	0	5	1	k__Bacteria;p__Proteobacteria;c__Alphaproteobacteria;o__Dongiales;f__Dongiaceae;g__Dongia;s__
Otu000832	1	3	2	0	1	0	2	0	4	3	6	2	5	1	0	2	0	0	k__Bacteria;p__Proteobacteria;c__Gammaproteobacteria;o__Xanthomonadales;f__Xanthomonadaceae;g__Lysobacter
Otu000833	0	2	0	3	0	0	3	0	10	3	5	2	4	0	0	0	0	0	k__Bacteria;p__Proteobacteria;c__Gammaproteobacteria;o__Pseudomonadales;f__Pseudomonadaceae;g__Pseudomonas;s__Pseudomonas_flexibilis
Otu000834	0	3	4	1	0	0	0	0	0	3	0	2	14	0	0	0	2	3	k__Bacteria;p__Actinobacteria;c__Coriobacteriia;o__Coriobacteriales;f__Eggerthellaceae;g__Gordonibacter;s__Gordonibacter_pamelaeae_7-10-1-b
Otu000835	1	2	0	1	2	5	1	0	6	2	8	2	1	0	1	0	0	0	k__Bacteria;p__Acidobacteria;c__Subgroup_6;o__Acidobacteria_bacterium_SCN_69-37;f__;g__;s__
Otu000836	3	3	0	0	0	0	2	0	9	2	2	5	4	0	0	0	0	2	k__Bacteria;p__Firmicutes;c__Clostridia;o__Clostridiales;f__Lachnospiraceae;g__Butyrivibrio_2;s__
Otu000837	2	2	1	1	3	4	2	1	1	4	0	0	3	0	0	0	1	6	k__Bacteria;p__Bacteroidetes;c__Bacteroidia;o__Bacteroidales;f__Muribaculaceae;g__;s__
Otu000838	7	0	0	0	0	1	0	0	0	1	4	8	1	1	0	8	0	0	k__Bacteria;p__Firmicutes;c__Clostridia;o__Clostridiales;f__Lachnospiraceae
Otu000839	2	4	1	2	0	1	3	2	0	0	5	0	2	2	1	1	0	5	k__Bacteria;p__Firmicutes;c__Clostridia;o__Clostridiales;f__Ruminococcaceae
Otu000840	4	3	0	0	0	0	0	0	11	1	6	0	6	0	0	0	0	0	k__Bacteria;p__Gemmatimonadetes;c__Gemmatimonadetes;o__Gemmatimonadales;f__Gemmatimonadaceae;g__Gemmatimonas;s__
Otu000841	3	0	4	2	3	3	0	7	0	4	0	1	2	0	0	0	0	2	k__Bacteria;p__Firmicutes;c__Clostridia;o__Clostridiales;f__Ruminococcaceae
Otu000842	3	2	1	1	0	0	1	2	5	1	4	0	3	0	1	3	4	0	k__Bacteria;p__Actinobacteria;c__Thermoleophilia;o__Gaiellales;f__Gaiellaceae;g__Gaiella;s__
Otu000843	0	2	2	0	0	2	0	1	6	2	9	0	7	0	0	0	0	0	k__Bacteria;p__Cyanobacteria;c__Oxyphotobacteria;o__Chloroplast;f__Tetradesmus_obliquus;g__;s__
Otu000844	0	4	8	0	0	3	5	0	0	4	0	0	0	0	3	0	2	2	k__Bacteria;p__Firmicutes;c__Clostridia;o__Clostridiales;f__Ruminococcaceae
Otu000845	1	0	0	2	0	0	0	0	0	1	8	12	0	0	2	5	0	0	k__Bacteria;p__Firmicutes;c__Clostridia;o__Clostridiales;f__Clostridiales_vadinBB60_group;g__;s__
Otu000846	1	1	0	0	0	2	1	2	10	4	3	3	2	0	0	0	0	1	k__Bacteria;p__Proteobacteria;c__Gammaproteobacteria;o__Acidithiobacillales;f__Acidithiobacillaceae;g__KCM-B-112;s__
Otu000847	1	0	0	0	0	0	2	0	0	0	0	0	27	0	0	0	0	0	k__Bacteria;p__Firmicutes;c__Erysipelotrichia;o__Erysipelotrichales;f__Erysipelotrichaceae
Otu000848	0	1	0	3	2	3	1	0	0	0	0	0	3	5	1	5	3	3	k__Bacteria;p__Bacteroidetes;c__Bacteroidia;o__Bacteroidales;f__Muribaculaceae;g__;s__
Otu000849	0	0	2	1	3	4	0	1	0	0	5	1	3	0	0	0	7	3	k__Bacteria;p__Firmicutes;c__Bacilli;o__Bacillales;f__Staphylococcaceae;g__Staphylococcus;s__
Otu000850	0	3	1	2	0	0	1	0	14	1	3	1	3	1	0	0	0	0	k__Bacteria;p__Proteobacteria;c__Alphaproteobacteria;o__Micropepsales;f__Micropepsaceae;g__;s__
Otu000851	0	0	2	0	7	1	0	3	3	1	2	5	1	2	0	3	0	0	k__Bacteria;p__Firmicutes;c__Clostridia;o__Clostridiales;f__Peptococcaceae;g__Peptococcus;s__
Otu000852	2	2	0	2	0	1	1	0	0	2	2	3	5	2	0	4	2	2	k__Bacteria;p__Bacteroidetes;c__Bacteroidia;o__Bacteroidales;f__Muribaculaceae;g__;s__
Otu000853	0	4	3	2	0	0	1	0	7	2	4	2	3	2	0	0	0	0	k__Bacteria;p__Acidobacteria;c__Thermoanaerobaculia;o__Thermoanaerobaculales;f__Thermoanaerobaculaceae;g__Subgroup_10
Otu000854	0	0	1	0	3	2	0	0	0	1	8	2	6	5	0	0	1	1	k__Bacteria;p__Acidobacteria;c__Subgroup_6;o__;f__;g__;s__
Otu000855	0	0	0	6	2	3	0	0	0	1	3	8	0	0	4	3	0	0	k__Bacteria;p__Firmicutes;c__Clostridia;o__Clostridiales;f__Ruminococcaceae;g__Harryflintia
Otu000856	0	0	0	0	1	3	0	0	11	0	0	1	1	4	6	0	1	2	k__Bacteria;p__Firmicutes;c__Erysipelotrichia;o__Erysipelotrichales;f__Erysipelotrichaceae;g__Ileibacterium;s__Ileibacterium_valens
Otu000857	0	3	0	0	2	0	3	2	2	5	0	0	3	2	2	1	4	1	k__Bacteria;p__Bacteroidetes;c__Bacteroidia;o__Bacteroidales;f__Muribaculaceae;g__;s__
Otu000858	1	1	0	0	1	1	2	0	0	8	0	0	3	3	1	0	1	8	k__Bacteria;p__Firmicutes;c__Clostridia;o__Clostridiales;f__Ruminococcaceae
Otu000859	1	1	0	4	0	2	0	0	2	1	0	3	4	5	0	5	2	0	k__Bacteria;p__Bacteroidetes;c__Bacteroidia;o__Bacteroidales;f__Muribaculaceae
Otu000860	1	4	0	1	0	0	3	1	0	4	2	1	3	3	0	3	3	0	k__Bacteria;p__Bacteroidetes;c__Bacteroidia;o__Bacteroidales;f__Muribaculaceae;g__;s__
Otu000861	0	0	1	2	0	3	0	1	2	6	1	1	1	4	3	1	3	0	k__Bacteria;p__Bacteroidetes;c__Bacteroidia;o__Bacteroidales;f__Muribaculaceae;g__;s__
Otu000862	4	2	0	0	2	0	0	1	7	1	7	0	4	0	0	0	0	1	k__Bacteria;p__Actinobacteria;c__Actinobacteria;o__Micrococcales;f__Micrococcaceae;g__Micrococcus
Otu000863	0	0	2	0	0	0	1	0	10	5	3	4	4	0	0	0	0	0	k__Bacteria;p__Chloroflexi;c__Anaerolineae;o__Anaerolineales;f__Anaerolineaceae
Otu000864	2	0	1	2	1	2	2	0	2	1	0	0	4	0	6	0	4	2	k__Bacteria;p__Bacteroidetes;c__Bacteroidia;o__Bacteroidales;f__Muribaculaceae;g__;s__
Otu000865	3	3	1	4	1	1	4	0	1	4	0	1	1	0	1	0	3	1	k__Bacteria;p__Bacteroidetes;c__Bacteroidia;o__Bacteroidales;f__Muribaculaceae
Otu000866	0	1	3	0	3	0	0	0	6	3	8	3	2	0	0	0	0	0	k__Bacteria;p__Proteobacteria;c__Gammaproteobacteria;o__Xanthomonadales;f__Rhodanobacteraceae;g__Dokdonella;s__
Otu000867	1	2	3	1	1	1	0	2	7	2	2	2	5	0	0	0	0	0	k__Bacteria;p__Actinobacteria;c__Acidimicrobiia;o__Microtrichales;f__Iamiaceae;g__Iamia;s__
Otu000868	1	0	8	1	0	0	0	1	1	0	4	4	4	0	3	0	1	1	k__Bacteria;p__Firmicutes;c__Clostridia;o__Clostridiales;f__Christensenellaceae;g__;s__
Otu000869	0	0	0	0	1	0	1	1	11	0	2	0	0	7	3	0	0	3	k__Bacteria;p__Firmicutes;c__Erysipelotrichia;o__Erysipelotrichales;f__Erysipelotrichaceae;g__Ileibacterium;s__Ileibacterium_valens
Otu000870	1	3	0	2	0	2	0	0	9	2	7	0	0	1	0	1	0	1	k__Bacteria;p__Rokubacteria;c__NC10;o__Rokubacteriales;f__;g__;s__
Otu000871	0	0	0	0	0	0	2	0	0	0	0	0	0	0	0	10	15	1	k__Bacteria;p__Bacteroidetes;c__Bacteroidia;o__Bacteroidales;f__Muribaculaceae;g__;s__
Otu000872	1	1	0	0	6	0	0	1	0	0	0	12	0	0	1	0	2	4	k__Bacteria;p__Firmicutes;c__Clostridia;o__Clostridiales;f__Lachnospiraceae
Otu000873	0	0	2	0	2	0	3	0	0	7	0	1	0	3	0	10	0	0	k__Bacteria;p__Firmicutes;c__Clostridia;o__Clostridiales;f__Ruminococcaceae
Otu000874	5	0	4	0	0	0	0	4	6	0	0	0	0	2	2	1	1	3	k__Bacteria;p__Firmicutes;c__Clostridia;o__Clostridiales;f__Lachnospiraceae;g__A2;s__
Otu000875	3	2	1	1	0	2	0	0	8	1	5	0	1	3	0	0	0	1	k__Bacteria;p__Proteobacteria;c__Alphaproteobacteria;o__Azospirillales;f__;g__;s__
Otu000876	1	1	1	0	1	4	0	0	2	1	0	2	5	0	4	1	3	2	k__Bacteria;p__Bacteroidetes;c__Bacteroidia;o__Bacteroidales;f__Muribaculaceae
Otu000877	1	0	0	0	0	0	0	0	10	8	2	3	4	0	0	0	0	0	k__Bacteria;p__Bacteroidetes;c__Ignavibacteria;o__Ignavibacteriales
Otu000878	0	0	3	0	0	1	1	3	11	0	8	1	0	0	0	0	0	0	k__Bacteria;p__Proteobacteria;c__Gammaproteobacteria;o__Betaproteobacteriales;f__Hydrogenophilaceae;g__;s__
Otu000879	2	1	5	0	0	0	1	0	0	0	8	2	8	0	0	0	1	0	k__Bacteria;p__Firmicutes;c__Clostridia;o__Clostridiales;f__Ruminococcaceae;g__Butyricicoccus;s__
Otu000880	1	3	1	0	1	1	3	1	11	0	4	1	0	0	0	0	0	1	k__Bacteria;p__Proteobacteria;c__Gammaproteobacteria;o__Betaproteobacteriales;f__B1-7BS;g__;s__
Otu000881	2	2	1	2	1	1	1	2	4	1	3	0	5	3	0	0	0	0	k__Bacteria;p__Proteobacteria;c__Alphaproteobacteria;o__Reyranellales;f__Reyranellaceae;g__Reyranella;s__
Otu000882	4	1	0	0	1	0	0	0	7	1	2	0	1	2	2	2	1	4	k__Bacteria;p__Proteobacteria;c__Alphaproteobacteria;o__Rhizobiales;f__Rhizobiaceae;g__Allorhizobium-Neorhizobium-Pararhizobium-Rhizobium
Otu000883	1	0	0	0	0	5	0	0	0	1	0	0	15	1	4	0	0	1	k__Bacteria;p__Firmicutes;c__Erysipelotrichia;o__Erysipelotrichales;f__Erysipelotrichaceae;g__Erysipelatoclostridium;s__
Otu000884	1	1	2	0	1	2	1	0	4	2	1	3	2	2	2	2	1	1	k__Bacteria;p__Bacteroidetes;c__Bacteroidia;o__Bacteroidales;f__Muribaculaceae;g__;s__
Otu000885	1	0	0	0	1	0	0	16	1	0	0	5	0	0	2	0	0	1	k__Bacteria;p__Firmicutes;c__Clostridia;o__Clostridiales
Otu000886	1	1	1	0	0	1	0	0	12	1	7	1	1	1	0	0	0	0	k__Bacteria;p__Proteobacteria;c__Alphaproteobacteria
Otu000887	0	5	1	0	3	0	1	1	1	2	4	1	3	2	0	0	3	0	k__Bacteria;p__Proteobacteria;c__Alphaproteobacteria;o__Caulobacterales;f__Caulobacteraceae;g__Brevundimonas
Otu000888	0	0	2	0	1	0	3	0	9	1	3	6	2	0	0	0	0	0	k__Bacteria;p__Verrucomicrobia;c__Verrucomicrobiae;o__Opitutales;f__Opitutaceae
Otu000889	0	0	0	0	0	0	0	0	1	0	6	3	2	5	1	3	1	5	k__Bacteria
Otu000890	1	4	0	0	6	0	2	1	0	0	12	0	0	1	0	0	0	0	k__Bacteria;p__Firmicutes;c__Clostridia;o__Clostridiales;f__Lachnospiraceae;g__Lachnospiraceae_NK4A136_group
Otu000891	1	0	1	1	0	0	1	1	0	0	6	1	4	7	1	1	1	1	k__Bacteria;p__Proteobacteria;c__Alphaproteobacteria;o__;f__;g__;s__
Otu000892	0	1	1	0	0	2	0	2	10	1	3	3	4	0	0	0	0	0	k__Bacteria;p__Actinobacteria;c__Actinobacteria;o__Streptomycetales;f__Streptomycetaceae;g__Streptomyces
Otu000893	1	4	2	0	2	0	2	1	5	1	1	0	5	0	0	1	0	2	k__Bacteria;p__Proteobacteria;c__Gammaproteobacteria;o__Xanthomonadales;f__Xanthomonadaceae;g__Pseudoxanthomonas
Otu000894	2	2	1	2	1	1	3	0	4	2	0	0	5	0	0	0	3	1	k__Bacteria;p__Proteobacteria;c__Gammaproteobacteria;o__Enterobacteriales;f__Enterobacteriaceae;g__Proteus;s__Proteus_mirabilis
Otu000895	2	1	0	3	1	2	2	0	3	2	1	0	2	0	3	1	3	1	k__Bacteria;p__Bacteroidetes;c__Bacteroidia;o__Bacteroidales;f__Muribaculaceae
Otu000896	4	0	0	0	0	0	1	3	7	4	3	0	5	0	0	0	0	0	k__Bacteria;p__Bacteroidetes;c__Bacteroidia;o__Chitinophagales;f__Chitinophagaceae;g__Terrimonas;s__
Otu000897	0	0	0	0	13	0	4	0	0	0	0	2	2	0	3	0	0	3	k__Bacteria;p__Firmicutes;c__Clostridia;o__Clostridiales;f__Ruminococcaceae;g__Ruminiclostridium_5
Otu000898	0	4	0	0	2	1	2	1	5	3	3	2	4	0	0	0	0	0	k__Bacteria;p__Actinobacteria;c__Thermoleophilia;o__Gaiellales;f__Gaiellaceae;g__Gaiella;s__
Otu000899	0	1	3	0	3	0	0	0	2	0	6	0	1	0	0	4	3	4	k__Bacteria;p__Proteobacteria;c__Alphaproteobacteria;o__Rhizobiales;f__Beijerinckiaceae;g__Methylobacterium;s__Methylobacterium_aquaticum
Otu000900	3	2	1	0	0	2	5	1	4	1	4	2	2	0	0	0	0	0	k__Bacteria;p__Acidobacteria;c__Subgroup_6
Otu000901	0	3	2	4	2	0	0	0	0	0	1	0	1	3	3	4	2	2	k__Bacteria;p__Bacteroidetes;c__Bacteroidia;o__Bacteroidales;f__Muribaculaceae
Otu000902	0	0	2	0	5	9	0	0	0	0	0	0	2	1	1	0	0	7	k__Bacteria;p__Firmicutes;c__Clostridia;o__Clostridiales;f__Ruminococcaceae
Otu000903	0	1	3	0	8	2	2	0	0	1	0	0	4	0	0	0	0	6	k__Bacteria;p__Firmicutes;c__Clostridia;o__Clostridiales
Otu000904	2	1	1	1	4	3	2	2	1	1	1	0	3	1	2	0	2	0	k__Bacteria;p__Bacteroidetes;c__Bacteroidia;o__Bacteroidales;f__Muribaculaceae;g__;s__
Otu000905	1	2	0	0	0	1	1	1	0	5	4	1	3	2	1	2	2	1	k__Bacteria;p__Bacteroidetes;c__Bacteroidia;o__Bacteroidales;f__Muribaculaceae;g__;s__
Otu000906	2	1	0	0	1	3	1	2	9	3	3	0	1	0	0	0	0	0	k__Bacteria;p__Acidobacteria;c__Subgroup_6
Otu000907	3	0	0	0	4	2	0	0	0	3	2	0	1	2	0	7	2	0	k__Bacteria;p__Bacteroidetes;c__Bacteroidia;o__Bacteroidales
Otu000908	1	4	0	0	0	0	2	3	4	2	2	2	3	2	1	0	0	0	k__Bacteria;p__Proteobacteria;c__Alphaproteobacteria;o__Rhodobacterales;f__Rhodobacteraceae;g__Rhodobacter;s__
Otu000909	3	1	0	0	1	2	1	2	0	2	7	0	2	1	1	2	1	0	k__Bacteria;p__Bacteroidetes;c__Bacteroidia;o__Flavobacteriales;f__Flavobacteriaceae;g__Flavobacterium
Otu000910	1	1	0	0	1	1	2	5	0	1	4	1	3	2	3	1	0	0	k__Bacteria;p__Firmicutes;c__Clostridia;o__Clostridiales;f__Lachnospiraceae;g__Lachnospiraceae_UCG-006;s__Clostridium_sp_ASF502
Otu000911	0	0	0	0	0	0	0	0	26	0	0	0	0	0	0	0	0	0	k__Bacteria;p__Actinobacteria;c__Coriobacteriia;o__Coriobacteriales;f__Eggerthellaceae;g__Enterorhabdus;s__Enterorhabdus_muris
Otu000912	0	0	0	0	0	1	1	0	0	0	0	0	0	0	0	0	24	0	k__Bacteria;p__Firmicutes;c__Clostridia;o__Clostridiales;f__Ruminococcaceae;g__Ruminococcaceae_UCG-013;s__
Otu000913	3	3	0	0	0	0	1	0	9	6	2	1	1	0	0	0	0	0	k__Bacteria;p__Proteobacteria;c__Alphaproteobacteria;o__Rhizobiales;f__Rhizobiaceae
Otu000914	1	0	0	0	2	1	0	0	10	0	6	3	3	0	0	0	0	0	k__Bacteria;p__Proteobacteria;c__Alphaproteobacteria;o__Sphingomonadales;f__Sphingomonadaceae;g__Novosphingobium;s__
Otu000915	0	0	0	0	10	0	0	0	0	0	0	0	0	16	0	0	0	0	k__Bacteria;p__Firmicutes;c__Clostridia;o__Clostridiales;f__Lachnospiraceae;g__Lachnospiraceae_NK4A136_group;s__
Otu000916	1	0	1	0	2	1	1	0	9	1	1	2	7	0	0	0	0	0	k__Bacteria;p__Bacteroidetes;c__Bacteroidia;o__Cytophagales;f__Microscillaceae;g__Chryseolinea;s__
Otu000917	0	0	0	1	3	2	2	1	8	1	1	2	3	2	0	0	0	0	k__Bacteria;p__Proteobacteria;c__Gammaproteobacteria;o__Betaproteobacteriales;f__TRA3-20;g__;s__
Otu000918	2	0	4	1	2	3	1	0	0	1	0	1	1	2	1	6	0	1	k__Bacteria;p__Bacteroidetes;c__Bacteroidia;o__Bacteroidales;f__Muribaculaceae
Otu000919	2	0	0	2	1	0	1	2	0	2	4	2	2	2	1	5	0	0	k__Bacteria;p__Bacteroidetes;c__Bacteroidia;o__Bacteroidales;f__Marinifilaceae;g__Odoribacter
Otu000920	1	1	2	0	0	1	2	0	11	1	3	1	1	0	0	0	2	0	k__Bacteria;p__Acidobacteria;c__Subgroup_6;o__;f__;g__;s__
Otu000921	0	0	0	1	0	0	0	1	0	4	0	6	3	3	4	1	3	0	k__Bacteria;p__Firmicutes;c__Erysipelotrichia;o__Erysipelotrichales;f__Erysipelotrichaceae
Otu000922	1	1	0	0	0	2	0	1	0	2	0	1	3	3	4	3	0	4	k__Bacteria;p__Bacteroidetes;c__Bacteroidia;o__Bacteroidales
Otu000923	0	1	3	0	0	2	0	2	10	2	3	0	2	0	0	0	0	0	k__Bacteria;p__Proteobacteria;c__Gammaproteobacteria;o__R7C24;f__;g__;s__
Otu000924	4	0	7	2	0	0	0	0	0	3	0	1	0	0	2	0	2	4	k__Bacteria;p__Bacteroidetes;c__Bacteroidia;o__Bacteroidales
Otu000925	0	8	0	0	0	0	2	2	0	0	0	0	10	3	0	0	0	0	k__Bacteria;p__Firmicutes;c__Clostridia;o__Clostridiales;f__Lachnospiraceae
Otu000926	3	0	0	6	0	0	2	0	2	0	4	0	0	6	0	0	0	2	k__Bacteria;p__Firmicutes;c__Clostridia;o__Clostridiales;f__Lachnospiraceae;g__Acetatifactor;s__
Otu000927	0	1	2	0	8	2	0	0	0	0	1	4	2	1	1	1	0	2	k__Bacteria;p__Firmicutes;c__Clostridia;o__Clostridiales;f__Lachnospiraceae;g__GCA-900066575;s__
Otu000928	3	1	1	0	0	0	0	1	1	6	0	0	1	2	1	3	3	2	k__Bacteria;p__Bacteroidetes;c__Bacteroidia;o__Bacteroidales;f__Muribaculaceae;g__;s__
Otu000929	0	1	3	0	7	1	1	0	0	0	0	2	0	8	0	0	0	2	k__Bacteria;p__Firmicutes;c__Clostridia;o__Clostridiales;f__Ruminococcaceae;g__Ruminococcaceae_UCG-010;s__
Otu000930	0	0	2	0	8	0	0	0	2	0	3	0	3	0	4	0	0	3	k__Bacteria;p__Firmicutes;c__Clostridia;o__Clostridiales;f__Lachnospiraceae;g__Eisenbergiella;s__
Otu000931	0	3	2	0	0	3	0	0	7	3	4	2	1	0	0	0	0	0	k__Bacteria;p__Proteobacteria;c__Gammaproteobacteria;o__Xanthomonadales;f__Xanthomonadaceae
Otu000932	0	0	3	0	3	2	1	0	9	0	4	1	2	0	0	0	0	0	k__Bacteria;p__Proteobacteria;c__Deltaproteobacteria;o__Desulfuromonadales;f__Geobacteraceae;g__Geobacter
Otu000933	0	0	0	0	0	0	5	0	0	0	0	0	0	0	0	6	12	2	k__Bacteria;p__Bacteroidetes;c__Bacteroidia;o__Bacteroidales;f__Muribaculaceae
Otu000934	0	0	1	0	1	0	0	2	10	0	2	1	0	2	0	0	5	1	k__Bacteria;p__Proteobacteria;c__Gammaproteobacteria;o__Betaproteobacteriales;f__Burkholderiaceae;g__Massilia
Otu000935	0	0	0	2	5	1	0	0	0	1	0	2	4	6	2	2	0	0	k__Bacteria;p__Firmicutes;c__Clostridia;o__Clostridiales;f__Ruminococcaceae;g__Ruminococcaceae_NK4A214_group;s__
Otu000936	0	0	0	0	0	0	0	0	0	0	12	13	0	0	0	0	0	0	k__Bacteria;p__Bacteroidetes;c__Bacteroidia;o__Bacteroidales;f__Muribaculaceae;g__;s__
Otu000937	0	0	1	0	0	0	2	0	10	0	0	4	6	0	0	0	0	2	k__Bacteria;p__Firmicutes;c__Clostridia;o__Clostridiales;f__Lachnospiraceae
Otu000938	3	0	1	0	0	1	1	0	0	2	1	0	1	2	1	8	0	4	k__Bacteria;p__Bacteroidetes;c__Bacteroidia;o__Bacteroidales;f__Muribaculaceae;g__;s__
Otu000939	6	0	0	0	1	5	2	1	0	0	0	0	0	0	0	0	0	10	k__Bacteria;p__Firmicutes;c__Clostridia;o__Clostridiales;f__Ruminococcaceae;g__Ruminococcaceae_UCG-010;s__
Otu000940	0	0	0	0	1	0	0	0	0	0	4	3	0	0	17	0	0	0	k__Bacteria;p__Firmicutes;c__Clostridia;o__Clostridiales;f__Lachnospiraceae
Otu000941	3	2	1	1	1	1	2	1	1	0	1	2	0	1	3	0	2	3	k__Bacteria;p__Bacteroidetes;c__Bacteroidia;o__Bacteroidales;f__Rikenellaceae;g__Alistipes
Otu000942	1	0	1	0	0	1	0	2	13	2	1	3	0	0	0	0	0	1	k__Bacteria;p__Acidobacteria;c__Subgroup_6;o__Acidobacteria_bacterium_SCN_69-37;f__;g__;s__
Otu000943	3	4	0	0	1	0	0	0	0	4	0	0	3	2	3	1	2	2	k__Bacteria;p__Bacteroidetes;c__Bacteroidia;o__Bacteroidales;f__Muribaculaceae
Otu000944	0	2	6	2	3	0	1	0	0	1	0	0	9	0	0	0	0	1	k__Bacteria;p__Firmicutes;c__Clostridia;o__Clostridiales;f__Ruminococcaceae
Otu000945	1	1	0	1	0	4	2	1	1	1	1	1	4	0	4	0	1	2	k__Bacteria;p__Bacteroidetes;c__Bacteroidia;o__Bacteroidales;f__Muribaculaceae;g__;s__
Otu000946	0	1	0	1	1	0	1	2	3	3	2	0	4	5	0	0	2	0	k__Bacteria;p__Proteobacteria;c__Alphaproteobacteria;o__Rhizobiales;f__Rhizobiaceae;g__Allorhizobium-Neorhizobium-Pararhizobium-Rhizobium;s__Neorhizobium_huautlense
Otu000947	0	8	6	0	3	0	0	0	1	0	0	1	0	4	0	0	1	0	k__Bacteria;p__Firmicutes;c__Clostridia;o__Clostridiales;f__Lachnospiraceae
Otu000948	0	0	3	0	1	0	0	0	0	0	0	2	3	14	0	1	0	0	k__Bacteria;p__Firmicutes;c__Clostridia;o__Clostridiales;f__Lachnospiraceae;g__;s__
Otu000949	0	0	1	0	0	0	2	9	0	0	0	0	12	0	0	0	0	0	k__Bacteria;p__Firmicutes;c__Clostridia;o__Clostridiales;f__Clostridiales_vadinBB60_group;g__;s__
Otu000950	2	1	1	2	2	0	0	2	4	1	6	1	0	1	0	0	0	1	k__Bacteria;p__Acidobacteria;c__Subgroup_6;o__;f__;g__;s__
Otu000951	0	3	1	2	1	0	0	1	3	2	5	3	3	0	0	0	0	0	k__Bacteria;p__Proteobacteria;c__Alphaproteobacteria;o__;f__;g__;s__
Otu000952	0	4	0	0	1	1	3	0	1	0	0	0	0	0	0	0	8	6	k__Bacteria;p__Firmicutes;c__Erysipelotrichia;o__Erysipelotrichales;f__Erysipelotrichaceae;g__Faecalibaculum;s__
Otu000953	0	1	1	0	0	0	0	0	19	0	0	1	0	1	1	0	0	0	k__Bacteria;p__Acidobacteria;c__Blastocatellia_Subgroup_4;o__Blastocatellales;f__Blastocatellaceae
Otu000954	0	4	0	0	2	2	1	0	0	6	1	2	0	6	0	0	0	0	k__Bacteria;p__Firmicutes;c__Clostridia;o__Clostridiales;f__Christensenellaceae;g__Christensenellaceae_R-7_group
Otu000955	0	5	0	0	0	4	6	0	0	0	0	0	2	3	0	4	0	0	k__Bacteria
Otu000956	0	1	3	9	2	0	1	2	0	1	0	4	0	0	0	1	0	0	k__Bacteria;p__Firmicutes;c__Clostridia;o__Clostridiales;f__Lachnospiraceae
Otu000957	0	0	2	1	0	1	1	4	1	1	0	0	3	1	3	0	2	4	k__Bacteria;p__Bacteroidetes;c__Bacteroidia;o__Bacteroidales;f__Muribaculaceae
Otu000958	4	1	1	0	2	1	0	2	7	1	3	0	1	1	0	0	0	0	k__Bacteria;p__Proteobacteria;c__Alphaproteobacteria;o__Rhizobiales;f__Rhizobiaceae
Otu000959	0	1	0	0	0	1	4	0	7	5	1	0	2	1	0	0	0	2	k__Bacteria;p__Actinobacteria;c__Actinobacteria;o__Propionibacteriales;f__Nocardioidaceae;g__Nocardioides
Otu000960	0	0	0	0	0	0	0	0	4	1	6	0	10	1	0	0	0	2	k__Bacteria;p__Proteobacteria;c__Gammaproteobacteria;o__Betaproteobacteriales;f__Burkholderiaceae;g__Hydrogenophaga
Otu000961	1	10	0	0	6	0	0	0	0	0	3	0	3	1	0	0	0	0	k__Bacteria;p__Firmicutes;c__Clostridia;o__Clostridiales;f__Lachnospiraceae
Otu000962	0	4	0	0	1	0	0	0	1	0	2	0	2	4	2	4	3	1	k__Bacteria;p__Bacteroidetes;c__Bacteroidia;o__Bacteroidales;f__Muribaculaceae;g__;s__
Otu000963	1	2	0	0	0	0	0	2	7	1	7	0	4	0	0	0	0	0	k__Bacteria;p__Acidobacteria;c__Blastocatellia_Subgroup_4;o__Blastocatellales;f__Blastocatellaceae;g__Aridibacter;s__
Otu000964	0	1	3	1	3	0	0	0	0	1	5	1	2	4	2	1	0	0	k__Bacteria;p__Firmicutes;c__Clostridia;o__Clostridiales;f__Lachnospiraceae
Otu000965	0	4	1	2	1	0	2	0	2	0	3	0	1	1	1	1	1	4	k__Bacteria;p__Firmicutes;c__Bacilli;o__Lactobacillales;f__Lactobacillaceae;g__Lactobacillus
Otu000966	0	0	2	0	10	0	0	2	1	0	0	0	7	2	0	0	0	0	k__Bacteria;p__Firmicutes;c__Clostridia;o__Clostridiales;f__Lachnospiraceae;g__Lachnospiraceae_NK4A136_group;s__
Otu000967	1	1	3	2	6	0	0	0	3	0	0	1	2	2	1	2	0	0	k__Bacteria;p__Firmicutes;c__Clostridia;o__Clostridiales;f__Ruminococcaceae;g__Ruminiclostridium_9;s__Clostridiales_bacterium_CIEAF_019
Otu000968	2	0	3	0	0	2	1	2	11	0	1	0	1	0	0	0	0	0	k__Bacteria;p__Armatimonadetes;c__Fimbriimonadia;o__Fimbriimonadales;f__Fimbriimonadaceae;g__;s__
Otu000969	0	1	1	0	1	0	1	1	9	4	4	0	1	0	0	0	0	0	k__Bacteria;p__Proteobacteria;c__Alphaproteobacteria;o__Acetobacterales;f__Acetobacteraceae
Otu000970	1	0	3	5	2	2	0	0	0	4	0	2	0	0	3	0	1	0	k__Bacteria;p__Firmicutes;c__Clostridia;o__Clostridiales;f__Peptococcaceae;g__;s__
Otu000971	3	1	2	0	2	0	0	0	3	1	7	1	0	0	0	0	2	1	k__Bacteria;p__Bacteroidetes;c__Bacteroidia;o__Chitinophagales;f__Chitinophagaceae;g__Terrimonas;s__
Otu000972	0	0	0	1	0	3	1	0	3	5	3	1	4	0	0	2	0	0	k__Bacteria;p__Proteobacteria;c__Alphaproteobacteria;o__Dongiales;f__Dongiaceae;g__Dongia;s__
Otu000973	0	1	1	2	0	3	0	0	9	2	4	0	1	0	0	0	0	0	k__Bacteria;p__Verrucomicrobia;c__Verrucomicrobiae;o__Opitutales;f__Opitutaceae;g__Opitutus;s__
Otu000974	1	0	6	0	0	0	3	0	0	0	0	11	1	0	1	0	0	0	k__Bacteria;p__Firmicutes;c__Clostridia;o__Clostridiales;f__Lachnospiraceae
Otu000975	0	5	1	1	1	0	0	0	2	0	1	1	1	1	1	3	4	1	k__Bacteria;p__Bacteroidetes;c__Bacteroidia;o__Bacteroidales;f__Muribaculaceae;g__;s__
Otu000976	1	1	1	0	0	2	0	0	9	1	8	0	0	0	0	0	0	0	k__Bacteria;p__Proteobacteria;c__Gammaproteobacteria;o__Betaproteobacteriales;f__Nitrosomonadaceae;g__Ellin6067;s__
Otu000977	0	0	0	0	2	0	0	0	13	0	0	0	0	0	8	0	0	0	k__Bacteria;p__Firmicutes;c__Clostridia;o__Clostridiales;f__Lachnospiraceae
Otu000978	0	0	0	0	0	2	0	0	10	0	0	0	0	2	4	0	3	2	k__Bacteria;p__Firmicutes;c__Erysipelotrichia;o__Erysipelotrichales;f__Erysipelotrichaceae;g__Ileibacterium;s__Ileibacterium_valens
Otu000979	3	0	1	5	0	1	1	4	0	1	1	2	0	0	2	0	0	2	k__Bacteria;p__Bacteroidetes;c__Bacteroidia;o__Bacteroidales
Otu000980	2	4	1	1	0	0	2	0	5	2	2	2	2	0	0	0	0	0	k__Bacteria;p__Acidobacteria;c__Holophagae;o__Subgroup_7;f__;g__;s__
Otu000981	1	3	0	0	6	0	0	0	9	0	0	0	0	3	0	1	0	0	k__Bacteria;p__Firmicutes;c__Clostridia;o__Clostridiales;f__Lachnospiraceae;g__Roseburia;s__
Otu000982	0	0	0	0	0	0	0	0	0	0	0	0	0	0	23	0	0	0	k__Bacteria;p__Bacteroidetes;c__Bacteroidia;o__Bacteroidales;f__Muribaculaceae;g__;s__
Otu000983	1	5	0	0	1	0	0	1	1	4	0	3	0	0	4	1	1	1	k__Bacteria;p__Bacteroidetes;c__Bacteroidia;o__Bacteroidales;f__Muribaculaceae;g__;s__
Otu000984	0	0	1	0	17	0	0	1	0	1	0	0	1	1	0	1	0	0	k__Bacteria;p__Firmicutes;c__Clostridia;o__Clostridiales;f__Lachnospiraceae;g__Blautia;s__Lachnospiraceae_bacterium_28-4
Otu000985	0	0	0	0	3	4	0	0	0	1	0	4	6	1	0	0	0	4	k__Bacteria;p__Firmicutes;c__Clostridia;o__Clostridiales;f__Peptococcaceae;g__;s__
Otu000986	2	0	5	0	0	0	1	0	3	1	0	0	2	1	4	0	1	3	k__Bacteria;p__Bacteroidetes;c__Bacteroidia;o__Bacteroidales;f__Muribaculaceae;g__;s__
Otu000987	5	0	2	2	3	1	3	2	0	1	0	1	0	0	3	0	0	0	k__Bacteria;p__Bacteroidetes;c__Bacteroidia;o__Bacteroidales;f__Rikenellaceae;g__Alistipes
Otu000988	0	1	0	0	0	0	0	2	5	4	7	1	1	1	0	0	0	1	k__Bacteria;p__Bacteroidetes;c__Bacteroidia;o__Cytophagales;f__Microscillaceae;g__;s__
Otu000989	0	0	3	3	1	4	1	1	1	0	3	1	1	0	0	0	3	1	k__Bacteria;p__Bacteroidetes;c__Bacteroidia;o__Bacteroidales;f__Muribaculaceae
Otu000990	0	4	0	0	2	0	3	0	0	0	0	0	0	0	0	0	8	6	k__Bacteria;p__Firmicutes;c__Erysipelotrichia;o__Erysipelotrichales;f__Erysipelotrichaceae;g__Faecalibaculum;s__
Otu000991	0	3	1	0	0	1	1	0	4	3	3	3	1	0	0	0	1	2	k__Bacteria;p__Proteobacteria;c__Gammaproteobacteria;o__Betaproteobacteriales;f__Nitrosomonadaceae;g__Ellin6067;s__
Otu000992	0	8	0	2	1	0	0	1	0	0	0	0	8	1	1	0	0	0	k__Bacteria;p__Firmicutes;c__Clostridia;o__Clostridiales;f__Lachnospiraceae
Otu000993	0	0	0	2	0	0	4	0	6	4	5	0	0	0	1	0	0	0	k__Bacteria;p__Proteobacteria;c__Gammaproteobacteria;o__Betaproteobacteriales;f__Burkholderiaceae;g__Limnobacter;s__
Otu000994	2	1	2	0	0	1	0	0	6	0	4	0	3	1	0	0	0	2	k__Bacteria;p__Proteobacteria;c__Alphaproteobacteria;o__Reyranellales;f__Reyranellaceae;g__;s__
Otu000995	1	0	0	2	1	0	2	0	0	2	2	1	2	1	4	2	1	1	k__Bacteria;p__Bacteroidetes;c__Bacteroidia;o__Bacteroidales;f__Muribaculaceae
Otu000996	0	1	1	0	0	5	2	1	5	2	1	0	2	1	0	0	1	0	k__Bacteria;p__Bacteroidetes;c__Bacteroidia;o__Bacteroidales;f__Muribaculaceae;g__;s__
Otu000997	0	5	0	0	0	0	2	0	0	0	0	11	0	0	0	1	3	0	k__Bacteria;p__Firmicutes;c__Clostridia;o__Clostridiales
Otu000998	0	0	0	0	0	0	0	0	0	0	0	0	0	0	0	22	0	0	k__Bacteria;p__Tenericutes;c__Mollicutes;o__Anaeroplasmatales;f__Anaeroplasmataceae;g__Anaeroplasma;s__
Otu000999	2	2	0	0	0	1	0	1	0	0	1	0	1	4	0	3	7	0	k__Bacteria;p__Bacteroidetes;c__Bacteroidia;o__Bacteroidales;f__Muribaculaceae;g__;s__
Otu001000	0	2	0	2	1	0	1	2	7	0	4	0	1	0	1	0	1	0	k__Bacteria;p__Firmicutes;c__Erysipelotrichia;o__Erysipelotrichales;f__Erysipelotrichaceae;g__ZOR0006;s__
Otu001001	1	0	0	0	0	1	0	1	0	2	12	5	0	0	0	0	0	0	k__Bacteria;p__Firmicutes;c__Clostridia;o__Clostridiales;f__Lachnospiraceae
Otu001002	0	2	0	0	14	0	3	0	0	0	0	2	0	0	0	0	0	1	k__Bacteria;p__Firmicutes;c__Clostridia;o__Clostridiales
Otu001003	0	0	0	0	0	0	0	6	1	0	0	3	1	2	0	9	0	0	k__Bacteria;p__Firmicutes;c__Clostridia;o__Clostridiales;f__Lachnospiraceae
Otu001004	0	1	1	2	0	1	1	0	0	2	3	1	2	2	1	5	0	0	k__Bacteria;p__Bacteroidetes;c__Bacteroidia;o__Bacteroidales;f__Muribaculaceae;g__;s__
Otu001005	1	2	0	0	1	0	2	0	6	5	0	2	2	0	0	0	1	0	k__Bacteria;p__Actinobacteria;c__Thermoleophilia;o__Solirubrobacterales;f__67-14
Otu001006	0	6	0	3	0	4	0	0	0	1	0	0	2	1	1	0	1	3	k__Bacteria;p__Bacteroidetes;c__Bacteroidia;o__Bacteroidales;f__Muribaculaceae;g__;s__
Otu001007	0	0	1	2	1	0	0	0	6	1	6	0	1	1	0	2	0	1	k__Bacteria;p__Acidobacteria;c__Subgroup_17
Otu001008	0	0	0	0	0	2	2	11	5	0	0	1	0	0	0	0	0	0	k__Bacteria;p__Firmicutes;c__Bacilli;o__Lactobacillales;f__Streptococcaceae;g__Streptococcus
Otu001009	0	0	0	0	1	2	0	0	3	0	0	0	0	5	5	0	1	4	k__Bacteria;p__Firmicutes;c__Erysipelotrichia;o__Erysipelotrichales;f__Erysipelotrichaceae;g__Ileibacterium;s__Ileibacterium_valens
Otu001010	0	1	0	0	0	1	3	0	6	1	6	1	1	0	0	0	1	0	k__Bacteria;p__Acidobacteria;c__Blastocatellia_Subgroup_4;o__DS-100;f__;g__;s__
Otu001011	0	6	1	1	0	0	0	1	2	6	1	0	1	0	0	1	1	0	k__Bacteria;p__Proteobacteria;c__Alphaproteobacteria;o__Rhizobiales;f__Hyphomicrobiaceae
Otu001012	0	2	0	0	0	0	0	0	9	3	6	0	1	0	0	0	0	0	k__Bacteria;p__Actinobacteria;c__Actinobacteria;o__Propionibacteriales;f__Nocardioidaceae;g__Nocardioides
Otu001013	0	3	2	0	0	0	0	1	7	2	6	0	0	0	0	0	0	0	k__Bacteria;p__Proteobacteria;c__Deltaproteobacteria;o__Myxococcales;f__Nannocystaceae
Otu001014	0	1	5	5	0	2	0	0	0	0	3	0	2	0	0	3	0	0	k__Bacteria;p__Firmicutes;c__Bacilli;o__Lactobacillales;f__Lactobacillaceae;g__Lactobacillus
Otu001015	1	1	1	3	1	3	1	1	0	0	0	1	0	3	0	2	2	1	k__Bacteria;p__Bacteroidetes;c__Bacteroidia;o__Bacteroidales;f__Muribaculaceae;g__;s__
Otu001016	0	1	2	0	1	4	1	0	4	0	2	1	5	0	0	0	0	0	k__Bacteria
Otu001017	0	2	1	1	0	0	0	0	10	3	0	0	4	0	0	0	0	0	k__Bacteria;p__Acidobacteria;c__Subgroup_6;o__;f__;g__;s__
Otu001018	1	0	0	1	0	1	1	0	10	0	4	1	1	0	0	1	0	0	k__Bacteria;p__Proteobacteria;c__Gammaproteobacteria;o__PLTA13;f__;g__;s__
Otu001019	1	0	1	1	0	1	5	0	0	5	1	1	0	1	1	2	0	1	k__Bacteria;p__Bacteroidetes;c__Bacteroidia;o__Bacteroidales;f__Muribaculaceae
Otu001020	0	0	7	0	4	2	0	0	0	1	0	0	0	0	2	3	1	1	k__Bacteria;p__Firmicutes;c__Clostridia;o__Clostridiales;f__Ruminococcaceae;g__Eubacterium_coprostanoligenes_group
Otu001021	4	0	0	0	0	1	0	0	6	2	4	1	1	0	1	0	0	1	k__Bacteria;p__Gemmatimonadetes;c__Gemmatimonadetes;o__Gemmatimonadales;f__Gemmatimonadaceae;g__;s__
Otu001022	0	1	0	0	0	0	2	1	4	2	7	0	1	2	0	0	1	0	k__Bacteria;p__Acidobacteria;c__Subgroup_6;o__;f__;g__;s__
Otu001023	0	3	0	2	0	2	1	3	0	0	1	1	1	1	3	2	0	1	k__Bacteria;p__Bacteroidetes;c__Bacteroidia;o__Bacteroidales;f__Muribaculaceae;g__;s__
Otu001024	1	3	1	0	0	1	0	0	5	4	4	1	0	1	0	0	0	0	k__Bacteria;p__Acidobacteria;c__Thermoanaerobaculia;o__Thermoanaerobaculales;f__Thermoanaerobaculaceae;g__Subgroup_10;s__
Otu001025	4	0	2	1	0	0	0	0	2	1	3	0	4	1	0	0	1	1	k__Bacteria;p__Bacteroidetes;c__Bacteroidia;o__Flavobacteriales;f__Flavobacteriaceae;g__Flavobacterium
Otu001026	0	3	0	0	3	0	0	1	3	3	0	2	1	0	0	0	4	0	k__Bacteria;p__Proteobacteria;c__Gammaproteobacteria;o__Pseudomonadales;f__Pseudomonadaceae;g__Pseudomonas;s__Pseudomonas_resinovorans
Otu001027	1	1	2	0	1	1	1	0	5	2	3	3	0	0	0	0	0	0	k__Bacteria;p__Gemmatimonadetes;c__Longimicrobia;o__Longimicrobiales;f__Longimicrobiaceae;g__;s__
Otu001028	0	0	0	0	2	1	11	0	0	0	0	0	1	0	1	0	0	4	k__Bacteria;p__Firmicutes;c__Clostridia;o__Clostridiales;f__Peptococcaceae;g__;s__
Otu001029	0	4	1	0	0	4	0	0	0	0	3	3	3	1	0	1	0	0	k__Bacteria;p__Firmicutes;c__Clostridia;o__Clostridiales;f__Ruminococcaceae
Otu001030	2	1	3	0	3	1	0	0	0	2	0	0	2	3	0	0	2	1	k__Bacteria;p__Firmicutes;c__Clostridia;o__Clostridiales;f__Lachnospiraceae
Otu001031	0	3	0	0	0	0	3	1	10	0	0	0	2	0	0	0	1	0	k__Bacteria;p__Proteobacteria;c__Alphaproteobacteria;o__Rhizobiales;f__Rhizobiales_Incertae_Sedis;g__Bauldia
Otu001032	0	0	0	0	0	0	4	0	0	0	0	0	0	0	0	6	8	2	k__Bacteria;p__Bacteroidetes;c__Bacteroidia;o__Bacteroidales;f__Muribaculaceae;g__;s__
Otu001033	0	0	0	0	0	1	0	0	1	0	1	1	2	3	0	6	4	1	k__Bacteria;p__Bacteroidetes;c__Bacteroidia;o__Bacteroidales;f__Muribaculaceae;g__;s__
Otu001034	0	0	0	1	9	0	0	0	0	0	0	0	0	9	1	0	0	0	k__Bacteria;p__Firmicutes;c__Clostridia;o__Clostridiales;f__Ruminococcaceae
Otu001035	0	3	3	0	0	1	0	0	5	1	3	1	0	1	1	1	0	0	k__Bacteria;p__Bacteroidetes;c__Bacteroidia;o__Chitinophagales;f__Chitinophagaceae;g__;s__
Otu001036	0	0	1	1	0	0	0	3	3	3	0	0	5	4	0	0	0	0	k__Bacteria;p__Firmicutes;c__Clostridia;o__Clostridiales;f__Lachnospiraceae
Otu001037	3	0	0	0	0	0	0	0	0	0	2	2	0	5	0	3	5	0	k__Bacteria;p__Firmicutes;c__Clostridia;o__Clostridiales;f__Clostridiales_vadinBB60_group;g__;s__
Otu001038	0	2	0	2	0	1	2	0	5	0	2	0	3	0	0	0	1	2	k__Bacteria;p__Bacteroidetes;c__Bacteroidia;o__Chitinophagales;f__Saprospiraceae;g__;s__
Otu001039	0	0	1	0	0	1	1	0	0	3	3	0	1	2	1	3	0	4	k__Bacteria;p__Bacteroidetes;c__Bacteroidia;o__Bacteroidales;f__Muribaculaceae;g__;s__
Otu001040	0	0	0	0	0	1	2	0	1	5	2	0	2	0	2	1	4	0	k__Bacteria;p__Bacteroidetes;c__Bacteroidia;o__Bacteroidales;f__Muribaculaceae;g__;s__
Otu001041	0	0	0	0	0	0	0	0	0	0	0	0	0	20	0	0	0	0	k__Bacteria;p__Firmicutes;c__Clostridia;o__Clostridiales;f__Lachnospiraceae
Otu001042	2	1	1	0	1	2	1	3	0	1	1	1	1	1	1	0	0	3	k__Bacteria;p__Bacteroidetes;c__Bacteroidia;o__Bacteroidales;f__Muribaculaceae
Otu001043	1	0	0	0	0	2	0	2	7	3	2	0	3	0	0	0	0	0	k__Bacteria;p__Chloroflexi;c__Chloroflexia;o__Thermomicrobiales;f__JG30-KF-CM45;g__;s__
Otu001044	0	0	0	1	5	1	5	1	0	1	0	2	0	0	0	0	0	4	k__Bacteria;p__Firmicutes;c__Clostridia;o__Clostridiales;f__Ruminococcaceae
Otu001045	0	0	0	0	1	1	1	0	1	0	1	4	0	1	10	0	0	0	k__Bacteria;p__Firmicutes;c__Clostridia;o__Clostridiales;f__Clostridiales_vadinBB60_group;g__;s__
Otu001046	0	3	0	0	0	2	2	0	7	3	3	0	0	0	0	0	0	0	k__Bacteria;p__Bacteroidetes;c__Bacteroidia;o__Cytophagales;f__Microscillaceae
Otu001047	0	0	3	0	3	0	1	2	0	2	1	1	0	1	0	1	0	5	k__Bacteria;p__Bacteroidetes;c__Bacteroidia;o__Bacteroidales;f__Muribaculaceae
Otu001048	0	1	0	0	0	0	1	2	1	3	3	1	0	4	1	1	2	0	k__Bacteria;p__Proteobacteria;c__Gammaproteobacteria;o__Betaproteobacteriales;f__Burkholderiaceae
Otu001049	0	0	2	0	1	1	0	0	0	3	0	0	7	3	2	0	0	1	k__Bacteria;p__Firmicutes;c__Clostridia;o__Clostridiales;f__Ruminococcaceae;g__DTU089
Otu001050	0	0	0	0	0	0	0	0	0	0	0	0	1	18	0	0	0	0	k__Bacteria;p__Firmicutes;c__Clostridia;o__Clostridiales;f__Lachnospiraceae
Otu001051	0	5	1	2	1	1	0	0	4	1	2	1	1	0	0	0	0	0	k__Bacteria;p__Gemmatimonadetes;c__Gemmatimonadetes;o__Gemmatimonadales;f__Gemmatimonadaceae;g__;s__
Otu001052	2	0	1	2	0	0	0	1	2	1	1	1	4	0	1	1	1	1	k__Bacteria;p__Bacteroidetes;c__Bacteroidia;o__Bacteroidales;f__Muribaculaceae;g__;s__
Otu001053	0	1	1	0	1	1	0	1	8	1	1	1	3	0	0	0	0	0	k__Bacteria;p__Chloroflexi;c__Anaerolineae;o__SBR1031;f__A4b;g__;s__
Otu001054	1	2	0	1	0	0	2	0	2	1	4	0	4	2	0	0	0	0	k__Bacteria;p__Acidobacteria;c__Subgroup_6
Otu001055	0	1	0	0	0	1	4	0	3	1	1	0	3	1	1	0	1	2	k__Bacteria;p__Bacteroidetes;c__Bacteroidia;o__Bacteroidales;f__Muribaculaceae;g__;s__
Otu001056	0	0	2	0	0	0	0	0	3	0	4	1	3	0	0	1	0	5	k__Bacteria;p__Proteobacteria;c__Gammaproteobacteria;o__Betaproteobacteriales;f__Nitrosomonadaceae;g__MND1;s__
Otu001057	0	2	2	0	2	1	1	2	5	0	3	0	0	1	0	0	0	0	k__Bacteria;p__Actinobacteria;c__Acidimicrobiia;o__Actinomarinales;f__;g__;s__
Otu001058	0	0	0	0	0	0	3	0	0	0	0	0	0	0	0	0	0	16	k__Bacteria;p__Firmicutes
Otu001059	0	1	0	0	1	0	1	0	7	2	3	0	4	0	0	0	0	0	k__Bacteria;p__Proteobacteria;c__Gammaproteobacteria;o__Xanthomonadales;f__Rhodanobacteraceae;g__Rhodanobacter
Otu001060	1	0	2	0	0	2	0	1	4	1	5	0	2	1	0	0	0	0	k__Bacteria;p__Proteobacteria;c__Deltaproteobacteria;o__Desulfarculales;f__Desulfarculaceae;g__;s__
Otu001061	0	4	1	0	0	1	2	0	8	0	2	0	0	0	1	0	0	0	k__Bacteria;p__Chloroflexi;c__Anaerolineae;o__Anaerolineales;f__Anaerolineaceae;g__UTCFX1;s__
Otu001062	2	0	0	2	0	0	0	0	5	1	4	1	1	0	1	0	1	1	k__Bacteria;p__Proteobacteria;c__Alphaproteobacteria;o__Caulobacterales;f__Caulobacteraceae;g__Brevundimonas;s__
Otu001063	1	1	2	1	0	0	1	0	4	4	2	0	1	0	0	0	1	1	k__Bacteria;p__Acidobacteria;c__Subgroup_22;o__;f__;g__;s__
Otu001064	0	1	0	1	0	2	0	0	2	5	0	1	3	0	1	0	2	1	k__Bacteria;p__Bacteroidetes;c__Bacteroidia;o__Bacteroidales;f__Tannerellaceae
Otu001065	0	1	2	1	0	0	0	1	0	1	1	0	2	9	0	1	0	0	k__Bacteria;p__Firmicutes;c__Clostridia;o__Clostridiales;f__Lachnospiraceae;g__;s__
Otu001066	4	0	2	1	2	0	0	0	1	0	4	1	0	2	0	2	0	0	k__Bacteria;p__Nitrospirae;c__Nitrospira;o__Nitrospirales;f__Nitrospiraceae;g__Nitrospira;s__
Otu001067	1	1	4	4	0	1	0	0	3	0	3	0	2	0	0	0	0	0	k__Bacteria;p__Actinobacteria;c__Acidimicrobiia;o__Microtrichales;f__Ilumatobacteraceae;g__Ilumatobacter;s__
Otu001068	0	0	1	0	1	1	1	0	9	3	1	1	1	0	0	0	0	0	k__Bacteria;p__Acidobacteria;c__Acidobacteriia;o__Solibacterales;f__Solibacteraceae_Subgroup_3;g__Candidatus_Solibacter;s__
Otu001069	0	0	1	3	0	0	0	1	4	1	4	0	0	1	0	0	2	2	k__Bacteria;p__Proteobacteria;c__Gammaproteobacteria;o__Betaproteobacteriales;f__Nitrosomonadaceae;g__mle1-7;s__
Otu001070	4	4	2	0	0	0	0	0	4	0	3	1	1	0	0	0	0	0	k__Bacteria;p__Chloroflexi;c__Anaerolineae;o__Anaerolineales;f__Anaerolineaceae;g__UTCFX1;s__
Otu001071	5	1	1	0	1	0	3	0	0	1	0	0	1	3	1	1	1	0	k__Bacteria;p__Firmicutes;c__Clostridia;o__Clostridiales;f__Christensenellaceae;g__;s__
Otu001072	0	0	0	2	0	3	0	0	6	0	5	1	2	0	0	0	0	0	k__Bacteria;p__Proteobacteria;c__Alphaproteobacteria
Otu001073	2	0	0	0	0	0	0	0	4	2	5	2	4	0	0	0	0	0	k__Bacteria;p__Planctomycetes;c__Planctomycetacia;o__Planctomycetales;f__Rubinisphaeraceae;g__SH-PL14
Otu001074	1	0	0	0	1	0	0	2	2	3	2	0	4	1	0	0	1	2	k__Bacteria;p__Proteobacteria;c__Alphaproteobacteria;o__Rhizobiales;f__Rhizobiaceae;g__Allorhizobium-Neorhizobium-Pararhizobium-Rhizobium;s__
Otu001075	3	4	1	1	0	2	0	1	0	1	1	1	0	1	0	1	2	0	k__Bacteria;p__Bacteroidetes;c__Bacteroidia;o__Bacteroidales;f__Muribaculaceae;g__;s__
Otu001076	0	0	1	0	0	0	0	0	0	2	0	10	0	0	3	3	0	0	k__Bacteria;p__Firmicutes;c__Clostridia;o__Clostridiales;f__Clostridiales_vadinBB60_group;g__;s__
Otu001077	0	2	2	0	0	0	0	0	8	1	1	1	2	2	0	0	0	0	k__Bacteria;p__Proteobacteria;c__Alphaproteobacteria
Otu001078	2	0	0	2	1	3	0	1	0	1	1	1	2	2	1	1	1	0	k__Bacteria;p__Bacteroidetes;c__Bacteroidia;o__Bacteroidales;f__Muribaculaceae;g__;s__
Otu001079	0	0	0	0	0	0	0	8	0	0	0	11	0	0	0	0	0	0	k__Bacteria;p__Tenericutes;c__Mollicutes;o__Mollicutes_RF39;f__;g__;s__
Otu001080	0	1	4	0	2	0	0	0	0	5	0	2	1	3	0	0	1	0	k__Bacteria;p__Firmicutes;c__Clostridia;o__Clostridiales;f__Clostridiaceae_1;g__Clostridium_sensu_stricto_1;s__Clostridium_sp_ND2
Otu001081	1	2	2	2	0	0	1	0	0	4	5	0	2	0	0	0	0	0	k__Bacteria;p__Bacteroidetes;c__Bacteroidia;o__Cytophagales;f__Cyclobacteriaceae;g__Algoriphagus
Otu001082	1	0	0	0	2	1	1	0	10	0	1	0	3	0	0	0	0	0	k__Bacteria;p__Gemmatimonadetes;c__Gemmatimonadetes;o__Gemmatimonadales;f__Gemmatimonadaceae;g__Gemmatimonas;s__
Otu001083	3	0	1	0	0	0	0	3	6	0	1	3	0	0	0	1	0	1	k__Bacteria;p__Acidobacteria;c__Thermoanaerobaculia;o__Thermoanaerobaculales;f__Thermoanaerobaculaceae;g__Subgroup_10
Otu001084	3	2	0	0	3	0	0	0	0	3	0	1	2	0	1	0	1	3	k__Bacteria;p__Firmicutes;c__Clostridia;o__Clostridiales
Otu001085	0	1	0	3	0	0	0	8	0	0	0	1	3	1	0	1	0	0	k__Bacteria;p__Bacteroidetes;c__Bacteroidia;o__Bacteroidales;f__Rikenellaceae;g__Alistipes
Otu001086	0	0	2	2	1	2	0	0	0	4	0	0	1	0	3	2	1	0	k__Bacteria;p__Firmicutes;c__Clostridia;o__Clostridiales;f__Ruminococcaceae;g__Eubacterium_coprostanoligenes_group
Otu001087	1	0	2	0	0	0	0	0	2	0	6	1	1	1	0	4	0	0	k__Bacteria;p__Proteobacteria;c__Alphaproteobacteria;o__Rhizobiales;f__Xanthobacteraceae;g__Bradyrhizobium
Otu001088	0	0	2	0	0	0	13	0	1	0	0	0	0	0	2	0	0	0	k__Bacteria;p__Firmicutes;c__Clostridia;o__Clostridiales;f__Lachnospiraceae;g__Eubacterium_xylanophilum_group
Otu001089	0	1	1	0	0	2	2	0	6	3	1	0	1	1	0	0	0	0	k__Bacteria;p__Proteobacteria;c__Alphaproteobacteria;o__Rhizobiales;f__Rhizobiaceae;g__Pseudaminobacter;s__
Otu001090	0	0	0	0	0	0	0	0	0	2	7	9	0	0	0	0	0	0	k__Bacteria;p__Bacteroidetes;c__Bacteroidia;o__Bacteroidales;f__Muribaculaceae;g__;s__
Otu001091	0	0	0	5	0	0	0	4	4	0	0	0	0	4	1	0	0	0	k__Bacteria;p__Firmicutes;c__Clostridia;o__Clostridiales;f__Ruminococcaceae
Otu001092	2	2	0	0	2	1	3	1	0	0	0	6	0	0	0	0	0	1	k__Bacteria;p__Firmicutes;c__Clostridia;o__Clostridiales;f__Ruminococcaceae;g__Ruminococcaceae_UCG-010;s__
Otu001093	0	2	4	0	1	0	0	0	8	1	0	0	1	1	0	0	0	0	k__Bacteria;p__Chloroflexi;c__Anaerolineae;o__Anaerolineales;f__Anaerolineaceae;g__UTCFX1;s__
Otu001094	1	3	0	0	4	0	0	0	5	0	4	0	1	0	0	0	0	0	k__Bacteria;p__Acidobacteria;c__Subgroup_6
Otu001095	6	2	1	0	0	0	1	0	0	1	1	0	2	0	1	0	3	0	k__Bacteria;p__Bacteroidetes;c__Bacteroidia;o__Bacteroidales;f__Muribaculaceae
Otu001096	0	2	1	0	0	0	0	3	2	1	4	2	2	1	0	0	0	0	k__Bacteria;p__Proteobacteria;c__Alphaproteobacteria;o__Rhizobiales;f__Xanthobacteraceae;g__Pseudolabrys;s__
Otu001097	0	3	0	0	0	2	0	2	0	0	0	6	1	0	0	0	3	1	k__Bacteria;p__Firmicutes;c__Clostridia;o__Clostridiales;f__Ruminococcaceae;g__Ruminococcaceae_UCG-010;s__
Otu001098	1	0	0	1	0	1	2	2	2	0	3	0	0	1	1	0	0	4	k__Bacteria;p__Acidobacteria;c__Subgroup_6;o__;f__;g__;s__
Otu001099	4	0	0	0	0	0	0	0	14	0	0	0	0	0	0	0	0	0	k__Bacteria;p__Proteobacteria;c__Gammaproteobacteria;o__Enterobacteriales;f__Enterobacteriaceae
Otu001100	0	6	2	0	1	0	3	0	2	0	0	0	0	3	0	0	1	0	k__Bacteria;p__Firmicutes;c__Clostridia;o__Clostridiales;f__Lachnospiraceae
Otu001101	1	0	1	0	0	0	1	0	6	0	7	0	2	0	0	0	0	0	k__Bacteria;p__Actinobacteria;c__Thermoleophilia;o__Gaiellales;f__Gaiellaceae;g__Gaiella;s__
Otu001102	1	0	1	0	2	0	1	7	0	0	1	1	2	0	2	0	0	0	k__Bacteria;p__Firmicutes;c__Clostridia;o__Clostridiales;f__Ruminococcaceae
Otu001103	0	1	0	0	0	0	0	1	3	2	7	2	0	2	0	0	0	0	k__Bacteria;p__Proteobacteria;c__Gammaproteobacteria;o__Xanthomonadales;f__Rhodanobacteraceae
Otu001104	0	1	0	0	0	0	1	1	2	2	0	2	2	1	1	1	3	1	k__Bacteria;p__Firmicutes;c__Erysipelotrichia;o__Erysipelotrichales;f__Erysipelotrichaceae;g__Erysipelatoclostridium
Otu001105	0	1	0	1	0	0	1	0	6	0	2	3	0	4	0	0	0	0	k__Bacteria;p__Proteobacteria;c__Alphaproteobacteria;o__Rhizobiales;f__KF-JG30-B3;g__;s__
Otu001106	1	6	4	0	0	0	0	2	3	1	1	0	0	0	0	0	0	0	k__Bacteria;p__Verrucomicrobia;c__Verrucomicrobiae;o__Opitutales;f__Opitutaceae;g__Opitutus;s__
Otu001107	0	0	3	0	1	0	0	1	11	0	0	1	1	0	0	0	0	0	k__Bacteria;p__Bacteroidetes;c__Bacteroidia;o__Bacteroidales;f__Dysgonomonadaceae;g__Fermentimonas
Otu001108	4	0	0	1	0	1	0	0	0	3	1	2	1	2	1	0	1	1	k__Bacteria;p__Bacteroidetes;c__Bacteroidia;o__Bacteroidales;f__Muribaculaceae;g__;s__
Otu001109	1	0	0	0	0	0	0	0	2	2	6	0	3	4	0	0	0	0	k__Bacteria;p__Acidobacteria;c__Subgroup_17;o__;f__;g__;s__
Otu001110	0	1	1	0	0	1	0	0	7	3	3	2	0	0	0	0	0	0	k__Bacteria;p__Firmicutes;c__Clostridia;o__Clostridiales;f__Clostridiaceae_1;g__Clostridium_sensu_stricto_1
Otu001111	0	0	1	0	5	2	0	0	0	1	0	0	3	4	2	0	0	0	k__Bacteria;p__Firmicutes;c__Clostridia;o__Clostridiales;f__Ruminococcaceae;g__Ruminococcaceae_UCG-014;s__
Otu001112	0	2	1	2	1	1	1	0	2	2	1	0	1	0	0	0	1	3	k__Bacteria;p__Bacteroidetes;c__Bacteroidia;o__Bacteroidales
Otu001113	0	0	0	0	0	0	0	0	0	0	0	0	1	15	0	0	2	0	k__Bacteria;p__Firmicutes;c__Clostridia;o__Clostridiales;f__Lachnospiraceae
Otu001114	1	0	0	0	2	2	0	0	7	3	2	1	0	0	0	0	0	0	k__Bacteria;p__Actinobacteria;c__Thermoleophilia;o__Solirubrobacterales;f__67-14
Otu001115	1	0	1	0	0	0	2	0	9	3	1	1	0	0	0	0	0	0	k__Bacteria;p__Proteobacteria;c__Deltaproteobacteria;o__Myxococcales;f__Haliangiaceae;g__Haliangium;s__
Otu001116	0	0	2	0	2	0	0	1	0	0	1	3	6	0	0	2	1	0	k__Bacteria;p__Firmicutes;c__Clostridia;o__Clostridiales;f__Ruminococcaceae;g__Ruminococcaceae_UCG-009;s__
Otu001117	3	0	0	1	0	1	1	0	2	2	0	0	1	0	2	0	3	2	k__Bacteria;p__Bacteroidetes;c__Bacteroidia;o__Bacteroidales;f__Muribaculaceae;g__;s__
Otu001118	0	0	0	0	2	0	0	2	1	1	10	0	1	0	0	1	0	0	k__Bacteria;p__Proteobacteria;c__Deltaproteobacteria;o__Desulfarculales;f__Desulfarculaceae;g__;s__
Otu001119	0	0	0	0	0	2	0	0	11	0	2	0	2	0	0	0	0	0	k__Bacteria;p__Planctomycetes;c__Phycisphaerae;o__Tepidisphaerales;f__WD2101_soil_group;g__;s__
Otu001120	0	3	1	0	0	1	0	0	0	0	1	0	0	2	0	6	3	0	k__Bacteria;p__Bacteroidetes;c__Bacteroidia;o__Bacteroidales;f__Muribaculaceae;g__;s__
Otu001121	0	2	0	0	4	3	1	0	0	0	0	0	0	0	1	0	3	3	k__Bacteria
Otu001122	0	0	0	0	0	0	2	0	0	6	0	1	0	0	0	7	1	0	k__Bacteria;p__Firmicutes;c__Clostridia;o__Clostridiales;f__Ruminococcaceae
Otu001123	2	0	2	1	0	1	0	2	1	0	3	3	0	0	2	0	0	0	k__Bacteria;p__Firmicutes;c__Clostridia;o__Clostridiales;f__Lachnospiraceae;g__Lachnospiraceae_UCG-006;s__
Otu001124	0	0	4	1	0	1	0	0	0	2	2	0	1	3	0	0	3	0	k__Bacteria;p__Firmicutes;c__Bacilli;o__Lactobacillales;f__Lactobacillaceae;g__Lactobacillus
Otu001125	0	0	0	1	0	0	1	0	3	3	0	0	0	2	1	1	2	3	k__Bacteria;p__Bacteroidetes;c__Bacteroidia;o__Bacteroidales;f__Muribaculaceae;g__;s__
Otu001126	1	1	5	0	0	3	1	0	0	0	0	2	0	1	0	0	0	3	k__Bacteria;p__Bacteroidetes;c__Bacteroidia;o__Bacteroidales;f__Tannerellaceae;g__Macellibacteroides
Otu001127	0	2	0	1	1	1	0	0	1	0	2	0	1	5	1	0	2	0	k__Bacteria;p__Bacteroidetes;c__Bacteroidia;o__Bacteroidales;f__Muribaculaceae;g__;s__
Otu001128	0	0	0	0	0	1	3	1	5	0	2	1	4	0	0	0	0	0	k__Bacteria;p__Acidobacteria;c__Subgroup_5;o__;f__;g__;s__
Otu001129	1	0	0	0	6	0	0	0	0	0	5	0	2	0	0	1	2	0	k__Bacteria;p__Firmicutes;c__Clostridia;o__Clostridiales;f__Lachnospiraceae
Otu001130	2	0	0	0	2	0	0	7	1	0	0	5	0	0	0	0	0	0	k__Bacteria;p__Firmicutes;c__Clostridia;o__Clostridiales;f__Clostridiales_vadinBB60_group;g__;s__
Otu001131	0	0	0	0	0	0	0	0	8	0	1	0	2	2	1	3	0	0	k__Bacteria;p__Firmicutes;c__Clostridia;o__Clostridiales;f__Lachnospiraceae
Otu001132	0	0	2	0	0	0	1	1	0	0	0	1	8	1	0	3	0	0	k__Bacteria;p__Firmicutes;c__Clostridia;o__Clostridiales;f__Lachnospiraceae
Otu001133	2	1	2	2	0	0	0	0	3	2	2	1	1	1	0	0	0	0	k__Bacteria;p__Proteobacteria;c__Alphaproteobacteria;o__Rhizobiales;f__Xanthobacteraceae;g__;s__
Otu001134	0	0	0	0	0	0	1	0	2	0	4	0	2	2	0	5	1	0	k__Bacteria;p__Proteobacteria;c__Gammaproteobacteria;o__Betaproteobacteriales;f__B1-7BS;g__;s__
Otu001135	0	2	1	0	0	0	0	0	0	7	1	0	3	1	1	0	0	1	k__Bacteria;p__Bacteroidetes;c__Bacteroidia;o__Bacteroidales;f__Muribaculaceae;g__;s__
Otu001136	1	0	1	2	0	0	2	0	1	1	0	0	2	0	2	0	3	2	k__Bacteria;p__Bacteroidetes;c__Bacteroidia;o__Bacteroidales;f__Muribaculaceae
Otu001137	1	2	0	0	0	1	1	0	8	0	1	0	0	2	0	0	0	1	k__Bacteria;p__Acidobacteria;c__Subgroup_6;o__;f__;g__;s__
Otu001138	1	0	2	0	0	0	0	0	1	2	1	0	5	2	0	2	0	1	k__Bacteria;p__Proteobacteria;c__Gammaproteobacteria;o__JG36-GS-52;f__;g__;s__
Otu001139	0	1	0	0	0	0	1	0	7	2	2	0	3	0	0	0	1	0	k__Archaea;p__Thaumarchaeota;c__Nitrososphaeria;o__Nitrososphaerales;f__Nitrososphaeraceae;g__Candidatus_Nitrocosmicus;s__
Otu001140	0	0	12	0	1	0	0	0	0	0	4	0	0	0	0	0	0	0	k__Bacteria;p__Firmicutes;c__Clostridia;o__Clostridiales;f__Ruminococcaceae
Otu001141	2	1	1	0	0	0	0	0	5	1	2	2	2	0	0	0	0	0	k__Bacteria;p__Acidobacteria;c__Blastocatellia_Subgroup_4;o__Blastocatellales;f__Blastocatellaceae
Otu001142	2	4	1	0	0	0	4	0	3	1	0	0	1	0	0	0	0	0	k__Bacteria;p__Acidobacteria;c__Thermoanaerobaculia;o__Thermoanaerobaculales;f__Thermoanaerobaculaceae;g__Subgroup_10
Otu001143	0	1	0	0	0	0	3	0	5	1	1	5	0	0	0	0	0	0	k__Bacteria;p__Acidobacteria;c__Acidobacteriia;o__Solibacterales;f__Solibacteraceae_Subgroup_3
Otu001144	6	3	4	0	0	0	2	0	0	0	0	1	0	0	0	0	0	0	k__Bacteria;p__Firmicutes;c__Clostridia;o__Clostridiales
Otu001145	0	0	0	0	8	0	0	0	0	0	0	0	0	8	0	0	0	0	k__Bacteria;p__Firmicutes;c__Clostridia;o__Clostridiales;f__Lachnospiraceae;g__Lachnospiraceae_NK4A136_group;s__
Otu001146	2	1	0	0	0	0	0	1	3	0	3	0	0	2	3	1	0	0	k__Bacteria;p__Proteobacteria;c__Gammaproteobacteria;o__Betaproteobacteriales;f__Nitrosomonadaceae;g__MND1;s__
Otu001147	3	0	1	0	0	1	0	1	0	2	1	0	3	0	1	0	1	2	k__Bacteria;p__Bacteroidetes;c__Bacteroidia;o__Bacteroidales;f__Muribaculaceae;g__;s__
Otu001148	1	0	0	0	0	0	0	1	6	5	1	1	1	0	0	0	0	0	k__Bacteria;p__Proteobacteria;c__Alphaproteobacteria
Otu001149	2	3	1	0	0	0	2	0	0	0	7	0	0	1	0	0	0	0	k__Bacteria;p__Firmicutes;c__Clostridia;o__Clostridiales;f__Lachnospiraceae;g__Lachnospiraceae_NK4A136_group
Otu001150	3	0	0	0	11	0	0	0	0	0	1	0	0	1	0	0	0	0	k__Bacteria;p__Firmicutes;c__Clostridia;o__Clostridiales;f__Lachnospiraceae;g__Lachnospiraceae_NK4A136_group;s__
Otu001151	1	4	1	0	0	1	3	0	1	0	3	0	0	1	0	0	0	1	k__Bacteria;p__Proteobacteria;c__Gammaproteobacteria;o__Betaproteobacteriales;f__SC-I-84;g__;s__
Otu001152	0	0	1	1	2	1	0	0	4	1	4	0	1	0	0	1	0	0	k__Bacteria;p__Proteobacteria;c__Gammaproteobacteria;o__Betaproteobacteriales;f__Nitrosomonadaceae;g__Ellin6067;s__
Otu001153	1	1	0	3	0	0	0	1	1	0	5	3	1	0	0	0	0	0	k__Bacteria;p__Acidobacteria;c__Subgroup_6;o__Acidobacteria_bacterium_SCN_69-37;f__;g__;s__
Otu001154	0	1	1	0	1	2	0	0	2	3	3	2	1	0	0	0	0	0	k__Bacteria;p__Chloroflexi;c__KD4-96;o__;f__;g__;s__
Otu001155	1	1	0	0	0	1	0	0	0	0	1	5	0	2	1	2	0	2	k__Bacteria;p__Bacteroidetes;c__Bacteroidia;o__Bacteroidales;f__Muribaculaceae;g__;s__
Otu001156	0	0	0	1	1	2	0	0	1	0	0	3	3	2	1	0	1	1	k__Bacteria;p__Firmicutes;c__Clostridia;o__Clostridiales;f__Lachnospiraceae;g__GCA-900066575;s__
Otu001157	0	3	0	0	0	0	0	0	5	1	4	0	1	0	2	0	0	0	k__Bacteria;p__Chloroflexi;c__Chloroflexia;o__Thermomicrobiales;f__JG30-KF-CM45;g__;s__
Otu001158	1	0	0	0	0	4	0	0	0	0	0	0	9	1	1	0	0	0	k__Bacteria;p__Firmicutes;c__Erysipelotrichia;o__Erysipelotrichales;f__Erysipelotrichaceae;g__Erysipelatoclostridium
Otu001159	0	3	1	0	0	1	1	0	1	1	3	2	3	0	0	0	0	0	k__Bacteria;p__Bacteroidetes;c__Bacteroidia;o__Chitinophagales;f__Saprospiraceae;g__;s__
Otu001160	0	1	6	1	0	0	2	0	0	1	3	1	0	0	0	0	1	0	k__Bacteria;p__Firmicutes;c__Bacilli;o__Lactobacillales;f__Lactobacillaceae;g__Lactobacillus
Otu001161	4	0	0	0	3	2	0	0	0	0	3	1	0	0	0	3	0	0	k__Bacteria;p__Proteobacteria;c__Deltaproteobacteria;o__Desulfobacterales;f__Desulfobulbaceae;g__Desulfobulbus;s__
Otu001162	1	0	1	0	2	0	0	0	5	1	2	0	4	0	0	0	0	0	k__Bacteria;p__Acidobacteria;c__Thermoanaerobaculia;o__Thermoanaerobaculales;f__Thermoanaerobaculaceae;g__Subgroup_10
Otu001163	4	2	0	1	0	2	1	0	1	0	0	1	2	1	0	0	0	1	k__Bacteria;p__Bacteroidetes;c__Bacteroidia;o__Bacteroidales;f__Muribaculaceae;g__;s__
Otu001164	0	0	1	0	1	2	3	0	2	2	4	1	0	0	0	0	0	0	k__Bacteria;p__Chloroflexi;c__Anaerolineae;o__SBR1031;f__A4b;g__;s__
Otu001165	1	0	2	3	0	7	0	0	0	1	0	0	0	0	0	0	2	0	k__Bacteria;p__Firmicutes;c__Bacilli;o__Lactobacillales;f__Lactobacillaceae;g__Lactobacillus
Otu001166	0	1	2	0	0	0	1	0	2	4	1	0	5	0	0	0	0	0	k__Bacteria;p__Bacteroidetes;c__Bacteroidia;o__Bacteroidales;f__Prolixibacteraceae;g__;s__
Otu001167	0	1	3	0	0	0	0	0	0	3	2	0	2	2	0	3	0	0	k__Bacteria;p__Bacteroidetes;c__Bacteroidia;o__Bacteroidales;f__Muribaculaceae;g__;s__
Otu001168	1	0	0	1	0	0	0	2	7	1	2	0	1	0	0	1	0	0	k__Bacteria;p__Gemmatimonadetes;c__S0134_terrestrial_group;o__;f__;g__;s__
Otu001169	1	1	0	0	0	0	1	0	5	2	1	0	5	0	0	0	0	0	k__Bacteria;p__Proteobacteria;c__Deltaproteobacteria;o__Desulfuromonadales;f__Desulfuromonadaceae
Otu001170	0	1	0	0	0	0	0	2	3	3	5	0	2	0	0	0	0	0	k__Bacteria;p__Acidobacteria;c__Blastocatellia_Subgroup_4;o__Blastocatellales;f__Blastocatellaceae;g__JGI_0001001-H03;s__
Otu001171	1	0	0	0	2	0	0	1	6	2	1	0	3	0	0	0	0	0	k__Bacteria;p__Proteobacteria;c__Alphaproteobacteria;o__Micropepsales;f__Micropepsaceae;g__;s__
Otu001172	0	12	0	0	1	0	0	0	3	0	0	0	0	0	0	0	0	0	k__Bacteria;p__Firmicutes;c__Clostridia;o__Clostridiales;f__Lachnospiraceae
Otu001173	1	0	0	0	0	0	2	1	7	0	2	0	3	0	0	0	0	0	k__Bacteria;p__Proteobacteria;c__Alphaproteobacteria
Otu001174	2	1	1	0	0	0	0	2	1	2	2	0	1	1	0	0	2	1	k__Bacteria;p__Bacteroidetes;c__Bacteroidia;o__Bacteroidales;f__Muribaculaceae
Otu001175	0	1	1	0	0	2	0	3	0	0	1	0	1	3	3	0	1	0	k__Bacteria;p__Bacteroidetes;c__Bacteroidia;o__Bacteroidales;f__Muribaculaceae
Otu001176	2	0	1	1	0	6	1	0	1	0	1	0	0	0	1	0	1	1	k__Bacteria;p__Bacteroidetes;c__Bacteroidia;o__Bacteroidales;f__Muribaculaceae;g__;s__
Otu001177	3	0	1	0	0	0	0	0	4	2	2	0	3	1	0	0	0	0	k__Bacteria;p__Actinobacteria;c__Acidimicrobiia;o__Microtrichales
Otu001178	1	2	5	0	3	2	0	0	0	0	0	2	1	0	0	0	0	0	k__Bacteria;p__Firmicutes;c__Clostridia;o__Clostridiales;f__Ruminococcaceae
Otu001179	0	0	1	0	1	0	1	0	3	3	6	0	1	0	0	0	0	0	k__Bacteria;p__Hydrogenedentes;c__Hydrogenedentia;o__Hydrogenedentiales;f__Hydrogenedensaceae;g__;s__
Otu001180	2	0	1	0	0	0	0	0	8	0	1	1	3	0	0	0	0	0	k__Bacteria;p__Proteobacteria;c__Gammaproteobacteria;o__Betaproteobacteriales;f__Nitrosomonadaceae;g__Nitrosospira;s__
Otu001181	1	0	1	0	0	0	1	1	8	0	2	2	0	0	0	0	0	0	k__Bacteria;p__Proteobacteria;c__Deltaproteobacteria;o__Myxococcales;f__BIrii41;g__;s__
Otu001182	0	6	0	0	1	0	0	2	6	0	0	0	0	0	0	0	1	0	k__Bacteria;p__Planctomycetes;c__Planctomycetacia;o__Planctomycetales;f__;g__;s__
Otu001183	2	2	0	0	0	1	1	0	1	1	3	0	1	2	1	0	1	0	k__Bacteria;p__Bacteroidetes;c__Bacteroidia;o__Bacteroidales;f__Muribaculaceae;g__;s__
Otu001184	1	0	8	1	0	0	1	0	0	0	3	1	0	0	1	0	0	0	k__Bacteria;p__Firmicutes;c__Clostridia;o__Clostridiales;f__Lachnospiraceae
Otu001185	0	0	0	0	0	0	1	2	6	1	2	0	2	0	0	0	2	0	k__Bacteria;p__Rokubacteria;c__NC10;o__Rokubacteriales;f__;g__;s__
Otu001186	0	0	0	0	0	0	0	0	0	1	0	0	3	1	1	7	0	3	k__Bacteria;p__Bacteroidetes;c__Bacteroidia;o__Bacteroidales;f__Muribaculaceae;g__;s__
Otu001187	0	2	3	1	1	1	3	0	0	0	0	0	0	0	1	0	0	4	k__Bacteria;p__Firmicutes;c__Clostridia;o__Clostridiales;f__Ruminococcaceae
Otu001188	2	1	0	1	3	0	1	1	0	0	2	0	0	4	0	0	1	0	k__Bacteria;p__Bacteroidetes;c__Bacteroidia;o__Bacteroidales;f__Muribaculaceae
Otu001189	0	0	0	0	3	1	1	0	3	3	1	2	0	2	0	0	0	0	k__Bacteria;p__Bacteroidetes;c__Bacteroidia;o__Cytophagales;f__Microscillaceae
Otu001190	0	5	0	0	0	1	0	0	6	0	2	0	0	0	0	0	0	2	k__Bacteria;p__Gemmatimonadetes;c__S0134_terrestrial_group;o__;f__;g__;s__
Otu001191	2	0	1	0	0	0	0	0	0	2	1	0	3	2	1	1	1	2	k__Bacteria;p__Bacteroidetes;c__Bacteroidia;o__Bacteroidales;f__Muribaculaceae;g__;s__
Otu001192	1	1	0	2	1	0	0	0	0	2	1	0	1	2	1	2	1	0	k__Bacteria;p__Bacteroidetes;c__Bacteroidia;o__Bacteroidales;f__Muribaculaceae;g__;s__
Otu001193	0	0	0	2	3	0	2	4	0	0	2	2	0	0	0	0	0	0	k__Bacteria;p__Proteobacteria;c__Gammaproteobacteria;o__Xanthomonadales;f__Xanthomonadaceae;g__Arenimonas;s__
Otu001194	0	0	0	0	0	0	2	1	1	0	7	0	0	1	0	1	0	2	k__Bacteria;p__Acidobacteria;c__Subgroup_22;o__;f__;g__;s__
Otu001195	0	0	0	0	0	0	2	0	6	1	3	2	1	0	0	0	0	0	k__Bacteria;p__Bacteroidetes;c__Ignavibacteria;o__SJA-28;f__Chlorobi_bacterium_OLB5;g__;s__
Otu001196	0	2	0	1	0	0	0	0	2	2	4	0	1	1	0	0	1	1	k__Bacteria;p__Acidobacteria;c__Subgroup_11;o__;f__;g__;s__
Otu001197	0	0	0	0	0	0	0	0	3	0	3	0	0	1	2	1	4	1	k__Bacteria;p__Proteobacteria;c__Gammaproteobacteria;o__Betaproteobacteriales;f__Burkholderiaceae;g__Hydrogenophaga
Otu001198	0	0	1	0	0	0	1	0	12	1	0	0	0	0	0	0	0	0	k__Bacteria;p__Actinobacteria;c__Thermoleophilia;o__Gaiellales;f__;g__;s__
Otu001199	2	3	1	0	1	0	0	0	0	2	0	1	1	0	2	0	1	1	k__Bacteria;p__Bacteroidetes;c__Bacteroidia;o__Bacteroidales;f__Muribaculaceae;g__;s__
Otu001200	1	1	1	0	1	0	0	0	0	1	0	3	0	0	4	0	0	3	k__Bacteria;p__Firmicutes;c__Clostridia;o__Clostridiales;f__Ruminococcaceae;g__GCA-900066225;s__
Otu001201	0	1	0	0	1	1	1	0	0	0	1	1	1	2	1	5	0	0	k__Bacteria;p__Bacteroidetes;c__Bacteroidia;o__Bacteroidales;f__Muribaculaceae
Otu001202	0	1	0	0	1	3	0	0	3	1	1	0	0	1	2	2	0	0	k__Bacteria;p__Proteobacteria;c__Alphaproteobacteria;o__Rhizobiales;f__Beijerinckiaceae;g__Methylobacterium
Otu001203	0	0	0	1	0	0	1	0	7	2	0	0	1	1	2	0	0	0	k__Bacteria;p__Proteobacteria;c__Gammaproteobacteria;o__Cellvibrionales;f__Halieaceae;g__OM60NOR5_clade;s__
Otu001204	0	2	0	0	0	1	0	0	3	1	4	0	3	0	1	0	0	0	k__Bacteria;p__Actinobacteria;c__Actinobacteria;o__Micromonosporales;f__Micromonosporaceae
Otu001205	0	1	0	2	7	0	0	1	0	0	0	1	1	0	2	0	0	0	k__Bacteria;p__Firmicutes;c__Clostridia;o__Clostridiales;f__Family_XIII
Otu001206	1	0	1	0	0	0	0	0	7	0	3	0	3	0	0	0	0	0	k__Bacteria;p__Proteobacteria;c__Gammaproteobacteria;o__Betaproteobacteriales;f__TRA3-20;g__;s__
Otu001207	1	0	1	0	1	0	2	0	0	0	0	1	0	0	3	3	0	3	k__Bacteria;p__Bacteroidetes;c__Bacteroidia;o__Bacteroidales;f__Tannerellaceae;g__Macellibacteroides;s__bacterium_enrichment_culture_clone_BA32
Otu001208	0	2	1	0	0	2	2	0	1	1	1	1	0	0	0	0	2	2	k__Bacteria;p__Bacteroidetes;c__Bacteroidia;o__Bacteroidales;f__Muribaculaceae;g__;s__
Otu001209	0	0	0	12	3	0	0	0	0	0	0	0	0	0	0	0	0	0	k__Bacteria;p__Firmicutes;c__Clostridia;o__Clostridiales;f__Ruminococcaceae;g__Eubacterium_coprostanoligenes_group;s__Eubacteriaceae_bacterium_CHKCI005
Otu001210	0	0	0	0	0	2	0	0	0	0	0	0	2	0	0	4	4	3	k__Bacteria;p__Firmicutes;c__Bacilli;o__Bacillales;f__Staphylococcaceae;g__Jeotgalicoccus;s__
Otu001211	0	0	2	0	0	0	0	0	1	4	4	2	2	0	0	0	0	0	k__Bacteria;p__Bacteroidetes;c__Bacteroidia;o__Chitinophagales;f__Chitinophagaceae;g__Terrimonas;s__
Otu001212	2	2	0	0	0	2	0	0	5	1	2	1	0	0	0	0	0	0	k__Bacteria;p__Verrucomicrobia;c__Verrucomicrobiae;o__Opitutales;f__Opitutaceae;g__Opitutus;s__
Otu001213	2	2	0	3	0	0	2	1	4	0	1	0	0	0	0	0	0	0	k__Bacteria;p__Bacteroidetes;c__Bacteroidia;o__Chitinophagales;f__Chitinophagaceae
Otu001214	0	1	1	0	0	0	0	0	0	0	4	2	6	1	0	0	0	0	k__Bacteria;p__Acidobacteria;c__Subgroup_6
Otu001215	0	0	0	0	0	0	0	0	0	0	2	10	0	2	0	0	1	0	k__Bacteria;p__Tenericutes;c__Mollicutes;o__Mollicutes_RF39;f__;g__;s__
Otu001216	0	0	0	0	0	0	3	0	1	3	5	3	0	0	0	0	0	0	k__Bacteria;p__Proteobacteria;c__Deltaproteobacteria;o__Myxococcales;f__Nannocystaceae
Otu001217	0	0	0	0	0	0	2	4	4	1	2	0	2	0	0	0	0	0	k__Bacteria;p__Proteobacteria;c__Gammaproteobacteria;o__Betaproteobacteriales;f__Rhodocyclaceae
Otu001218	2	2	2	0	0	0	0	0	2	0	2	2	3	0	0	0	0	0	k__Bacteria;p__Gemmatimonadetes;c__Gemmatimonadetes;o__Gemmatimonadales;f__Gemmatimonadaceae;g__;s__
Otu001219	4	3	0	0	0	0	0	0	7	1	0	0	0	0	0	0	0	0	k__Bacteria;p__Chloroflexi;c__Anaerolineae;o__Anaerolineales;f__Anaerolineaceae;g__Anaerolinea;s__
Otu001220	0	1	1	0	0	0	0	0	0	2	2	2	2	1	2	0	2	0	k__Bacteria;p__Bacteroidetes;c__Bacteroidia;o__Bacteroidales;f__Muribaculaceae;g__;s__
Otu001221	0	1	0	0	1	0	0	0	5	4	3	0	1	0	0	0	0	0	k__Bacteria;p__Chloroflexi;c__Anaerolineae;o__SBR1031;f__A4b;g__;s__
Otu001222	0	2	0	0	2	2	2	0	1	1	1	0	0	0	0	1	2	1	k__Bacteria;p__Acidobacteria;c__Subgroup_6;o__;f__;g__;s__
Otu001223	0	0	1	1	1	3	1	5	0	1	0	0	1	0	1	0	0	0	k__Bacteria;p__Bacteroidetes;c__Bacteroidia;o__Bacteroidales;f__Rikenellaceae;g__Alistipes
Otu001224	0	2	2	0	0	0	0	0	1	4	5	1	0	0	0	0	0	0	k__Bacteria;p__Chloroflexi;c__Anaerolineae;o__SBR1031;f__A4b;g__;s__
Otu001225	0	0	1	0	1	0	0	0	1	3	4	1	2	0	0	2	0	0	k__Bacteria;p__Acidobacteria;c__Acidobacteriia;o__Solibacterales;f__Solibacteraceae_Subgroup_3;g__Bryobacter;s__
Otu001226	0	0	0	0	0	2	0	0	0	0	1	1	2	2	2	2	1	2	k__Bacteria;p__Bacteroidetes;c__Bacteroidia;o__Bacteroidales;f__Muribaculaceae;g__;s__
Otu001227	3	1	0	1	0	0	0	0	0	0	0	1	2	2	0	5	0	0	k__Bacteria;p__Bacteroidetes;c__Bacteroidia;o__Bacteroidales;f__Muribaculaceae
Otu001228	1	1	0	0	0	2	1	1	4	0	0	1	4	0	0	0	0	0	k__Bacteria;p__Actinobacteria;c__Actinobacteria;o__Micrococcales;f__Promicromonosporaceae;g__Cellulosimicrobium;s__Cellulosimicrobium_cellulans
Otu001229	0	0	3	3	1	0	0	0	2	3	0	0	0	0	1	0	2	0	k__Bacteria;p__Bacteroidetes;c__Bacteroidia;o__Bacteroidales;f__Muribaculaceae;g__;s__
Otu001230	0	0	0	0	0	0	1	0	5	0	5	1	1	0	0	1	0	1	k__Bacteria;p__Proteobacteria;c__Deltaproteobacteria;o__Desulfarculales;f__Desulfarculaceae;g__;s__
Otu001231	4	0	4	1	0	2	1	0	0	0	0	0	2	0	0	0	0	1	k__Bacteria;p__Firmicutes;c__Clostridia;o__Clostridiales;f__Ruminococcaceae
Otu001232	0	1	0	0	0	0	0	0	5	4	3	0	1	1	0	0	0	0	k__Bacteria;p__Chloroflexi;c__Chloroflexia;o__Thermomicrobiales;f__JG30-KF-CM45;g__;s__
Otu001233	0	0	0	1	0	0	1	0	2	2	2	0	3	1	0	0	1	2	k__Bacteria
Otu001234	3	0	2	0	0	1	1	0	4	1	2	0	1	0	0	0	0	0	k__Bacteria;p__Acidobacteria;c__Subgroup_6;o__;f__;g__;s__
Otu001235	0	0	0	0	0	0	0	0	0	4	1	6	0	0	1	2	0	0	k__Bacteria;p__Firmicutes;c__Clostridia;o__Clostridiales;f__Ruminococcaceae;g__Eubacterium_coprostanoligenes_group
Otu001236	0	0	1	0	1	0	0	0	2	2	3	1	4	0	0	0	0	0	k__Bacteria;p__Acidobacteria;c__Subgroup_5;o__;f__;g__;s__
Otu001237	0	2	0	0	0	1	0	0	9	0	1	0	1	0	0	0	0	0	k__Bacteria;p__Gemmatimonadetes;c__Gemmatimonadetes;o__Gemmatimonadales;f__Gemmatimonadaceae;g__;s__
Otu001238	0	0	7	0	2	0	0	0	0	0	0	1	0	0	2	2	0	0	k__Bacteria;p__Firmicutes;c__Clostridia;o__Clostridiales;f__Ruminococcaceae
Otu001239	0	2	0	0	0	0	2	1	3	0	2	0	3	1	0	0	0	0	k__Bacteria;p__Acidobacteria;c__Thermoanaerobaculia;o__Thermoanaerobaculales;f__Thermoanaerobaculaceae;g__Subgroup_10
Otu001240	0	0	2	0	0	0	2	0	2	1	2	0	0	0	0	1	0	4	k__Bacteria;p__Proteobacteria;c__Alphaproteobacteria;o__Rhizobiales;f__Hyphomicrobiaceae;g__Pedomicrobium;s__
Otu001241	1	2	0	0	0	0	0	0	3	1	1	1	3	2	0	0	0	0	k__Bacteria;p__Actinobacteria;c__Acidimicrobiia;o__Microtrichales;f__;g__;s__
Otu001242	1	0	0	0	0	0	0	0	2	0	3	1	0	2	0	4	0	1	k__Bacteria;p__Proteobacteria;c__Gammaproteobacteria;o__Betaproteobacteriales;f__Nitrosomonadaceae;g__Ellin6067
Otu001243	0	0	0	1	0	0	0	4	1	4	3	1	0	0	0	0	0	0	k__Bacteria;p__Rokubacteria;c__NC10;o__Rokubacteriales;f__;g__;s__
Otu001244	0	1	1	1	1	1	1	0	1	1	1	0	0	0	0	0	4	1	k__Bacteria;p__Bacteroidetes;c__Bacteroidia;o__Bacteroidales;f__Muribaculaceae;g__;s__
Otu001245	0	1	3	0	0	0	0	0	5	2	1	1	1	0	0	0	0	0	k__Bacteria;p__Proteobacteria;c__Alphaproteobacteria;o__Acetobacterales
Otu001246	0	0	0	0	0	1	0	1	5	2	4	0	1	0	0	0	0	0	k__Bacteria;p__Proteobacteria;c__Alphaproteobacteria;o__;f__;g__;s__
Otu001247	0	1	2	0	1	0	1	0	1	2	4	0	1	0	0	0	0	1	k__Bacteria;p__Acidobacteria;c__Acidobacteriia;o__Solibacterales;f__Solibacteraceae_Subgroup_3;g__Paludibaculum;s__
Otu001248	0	1	0	3	0	0	7	1	0	1	0	0	0	0	1	0	0	0	k__Bacteria;p__Bacteroidetes;c__Bacteroidia;o__Bacteroidales;f__Dysgonomonadaceae;g__Dysgonomonas
Otu001249	2	0	0	0	1	1	0	0	7	0	1	2	0	0	0	0	0	0	k__Bacteria;p__Chloroflexi;c__Anaerolineae;o__SBR1031;f__A4b;g__;s__
Otu001250	0	3	3	0	0	4	0	0	0	1	1	0	1	0	0	1	0	0	k__Bacteria;p__Acidobacteria;c__Acidobacteriia;o__Solibacterales;f__Solibacteraceae_Subgroup_3;g__Bryobacter
Otu001251	1	0	0	0	0	0	1	0	0	1	3	1	1	0	1	1	2	2	k__Bacteria;p__Bacteroidetes;c__Bacteroidia;o__Bacteroidales;f__Muribaculaceae;g__;s__
Otu001252	1	4	1	2	0	0	0	0	3	0	3	0	0	0	0	0	0	0	k__Bacteria;p__Actinobacteria;c__Acidimicrobiia;o__Microtrichales;f__Ilumatobacteraceae;g__;s__
Otu001253	1	3	0	0	0	0	0	1	4	1	2	0	2	0	0	0	0	0	k__Bacteria;p__Acidobacteria;c__Subgroup_6;o__;f__;g__;s__
Otu001254	1	1	0	0	0	0	2	2	4	0	1	0	3	0	0	0	0	0	k__Bacteria;p__Chloroflexi;c__TK10;o__;f__;g__;s__
Otu001255	0	0	0	0	0	1	1	1	3	0	1	0	7	0	0	0	0	0	k__Bacteria;p__Chloroflexi;c__Chloroflexia;o__Thermomicrobiales;f__JG30-KF-CM45;g__;s__
Otu001256	1	0	0	0	0	0	0	8	3	0	0	0	1	1	0	0	0	0	k__Bacteria;p__Firmicutes;c__Clostridia;o__Clostridiales;f__Ruminococcaceae
Otu001257	0	1	0	0	0	0	0	0	0	0	8	1	0	4	0	0	0	0	k__Bacteria;p__Firmicutes;c__Clostridia;o__Clostridiales;f__Clostridiales_vadinBB60_group;g__;s__
Otu001258	2	1	0	2	0	1	0	0	0	2	0	0	0	0	1	2	2	1	k__Bacteria;p__Bacteroidetes;c__Bacteroidia;o__Bacteroidales;f__Muribaculaceae;g__;s__
Otu001259	0	0	3	0	1	0	0	0	0	0	0	0	2	0	0	0	8	0	k__Bacteria;p__Firmicutes;c__Clostridia;o__Clostridiales;f__Clostridiales_vadinBB60_group;g__;s__
Otu001260	0	0	0	0	3	0	0	0	2	0	8	0	0	0	0	0	1	0	k__Bacteria;p__Proteobacteria;c__Gammaproteobacteria;o__Betaproteobacteriales;f__Burkholderiaceae;g__Massilia
Otu001261	0	0	0	4	0	0	0	1	0	1	0	0	8	0	0	0	0	0	k__Bacteria;p__Firmicutes;c__Clostridia;o__Clostridiales;f__Lachnospiraceae;g__ASF356
Otu001262	0	0	0	1	0	1	1	1	0	1	0	0	3	1	0	0	3	2	k__Bacteria;p__Bacteroidetes;c__Bacteroidia;o__Bacteroidales;f__Muribaculaceae;g__;s__
Otu001263	0	2	1	0	0	2	0	0	2	0	2	4	1	0	0	0	0	0	k__Bacteria;p__Planctomycetes;c__Planctomycetacia;o__Planctomycetales;f__;g__;s__
Otu001264	0	0	0	0	0	1	0	0	2	0	2	2	2	4	0	0	0	1	k__Bacteria;p__Firmicutes;c__Clostridia;o__Clostridiales;f__Lachnospiraceae;g__Lachnospiraceae_NK4A136_group
Otu001265	0	0	1	0	0	0	3	0	7	0	2	0	1	0	0	0	0	0	k__Bacteria;p__Actinobacteria;c__Actinobacteria;o__Propionibacteriales;f__Nocardioidaceae;g__Aeromicrobium;s__
Otu001266	0	1	0	0	0	1	1	0	1	3	0	0	1	0	2	0	3	1	k__Bacteria;p__Bacteroidetes;c__Bacteroidia;o__Bacteroidales;f__Muribaculaceae;g__;s__
Otu001267	1	1	0	0	1	0	0	0	2	0	7	0	2	0	0	0	0	0	k__Bacteria;p__Chloroflexi;c__TK10;o__;f__;g__;s__
Otu001268	1	0	0	2	0	1	1	0	1	1	1	0	2	0	0	1	0	3	k__Bacteria;p__Bacteroidetes;c__Bacteroidia;o__Bacteroidales;f__Muribaculaceae;g__;s__
Otu001269	1	4	0	1	0	1	0	1	0	1	0	0	0	2	1	1	0	1	k__Bacteria;p__Bacteroidetes;c__Bacteroidia;o__Bacteroidales;f__Muribaculaceae;g__;s__
Otu001270	1	3	0	0	0	0	0	1	5	0	1	0	2	0	0	1	0	0	k__Bacteria;p__Proteobacteria;c__Deltaproteobacteria;o__NB1-j;f__;g__;s__
Otu001271	2	0	0	0	0	0	2	0	3	1	2	0	4	0	0	0	0	0	k__Bacteria;p__Proteobacteria;c__Alphaproteobacteria;o__Reyranellales;f__Reyranellaceae;g__;s__
Otu001272	0	2	0	0	0	0	0	0	0	0	10	0	2	0	0	0	0	0	k__Bacteria;p__Acidobacteria;c__Subgroup_6;o__Acidobacteria_bacterium_SCN_69-37;f__;g__;s__
Otu001273	1	0	0	0	0	0	0	1	6	3	1	0	2	0	0	0	0	0	k__Bacteria;p__Bacteroidetes;c__Bacteroidia;o__Bacteroidales;f__Dysgonomonadaceae;g__Petrimonas;s__
Otu001274	11	0	2	0	1	0	0	0	0	0	0	0	0	0	0	0	0	0	k__Bacteria;p__Firmicutes;c__Clostridia;o__Clostridiales;f__Lachnospiraceae;g__Lachnospiraceae_NK4A136_group
Otu001275	0	0	0	0	1	0	0	7	0	0	2	0	1	2	0	0	1	0	k__Bacteria;p__Firmicutes;c__Clostridia;o__Clostridiales;f__Lachnospiraceae;g__Roseburia
Otu001276	0	2	0	1	1	1	1	0	0	1	1	0	1	0	0	0	2	3	k__Bacteria;p__Bacteroidetes;c__Bacteroidia;o__Bacteroidales;f__Muribaculaceae;g__;s__
Otu001277	2	0	0	0	0	0	2	1	4	2	2	0	0	0	0	0	1	0	k__Bacteria;p__Proteobacteria;c__Gammaproteobacteria;o__Betaproteobacteriales;f__Gallionellaceae
Otu001278	2	0	2	0	0	0	1	4	0	3	0	0	0	0	2	0	0	0	k__Bacteria;p__Bacteroidetes;c__Bacteroidia;o__Bacteroidales;f__Rikenellaceae;g__Alistipes
Otu001279	2	1	0	0	0	0	0	1	0	2	1	1	2	1	0	2	1	0	k__Bacteria;p__Bacteroidetes;c__Bacteroidia;o__Bacteroidales;f__Muribaculaceae;g__;s__
Otu001280	6	0	0	0	0	3	0	0	0	0	4	0	0	0	0	0	1	0	k__Bacteria;p__Proteobacteria;c__Gammaproteobacteria;o__Betaproteobacteriales;f__SC-I-84;g__;s__
Otu001281	3	0	0	0	2	7	0	2	0	0	0	0	0	0	0	0	0	0	k__Bacteria;p__Firmicutes;c__Clostridia;o__Clostridiales;f__Lachnospiraceae
Otu001282	0	1	0	2	0	1	0	0	5	3	2	0	0	0	0	0	0	0	k__Bacteria;p__Bacteroidetes;c__Bacteroidia;o__Chitinophagales;f__Chitinophagaceae
Otu001283	2	0	2	0	0	1	0	0	3	2	2	1	1	0	0	0	0	0	k__Bacteria;p__Proteobacteria;c__Gammaproteobacteria;o__Betaproteobacteriales;f__Burkholderiaceae
Otu001284	0	3	0	0	0	2	1	0	4	1	1	0	1	0	0	0	0	0	k__Bacteria;p__Chloroflexi;c__Anaerolineae;o__Anaerolineales;f__Anaerolineaceae;g__;s__
Otu001285	3	0	4	1	2	0	0	0	0	0	0	1	1	0	0	0	1	0	k__Bacteria;p__Firmicutes;c__Clostridia;o__Clostridiales;f__Lachnospiraceae
Otu001286	0	0	0	0	0	0	0	0	2	0	3	0	2	1	2	0	0	3	k__Bacteria;p__Proteobacteria;c__Gammaproteobacteria;o__Betaproteobacteriales;f__SC-I-84;g__;s__
Otu001287	0	0	1	1	0	1	0	0	0	2	0	1	0	2	0	3	1	1	k__Bacteria;p__Bacteroidetes;c__Bacteroidia;o__Bacteroidales;f__Muribaculaceae;g__;s__
Otu001288	0	0	0	0	13	0	0	0	0	0	0	0	0	0	0	0	0	0	k__Bacteria;p__Tenericutes;c__Mollicutes;o__Mollicutes_RF39;f__;g__;s__
Otu001289	0	0	0	0	2	0	1	0	8	0	1	1	0	0	0	0	0	0	k__Bacteria;p__Bacteroidetes;c__Bacteroidia;o__Bacteroidales;f__Prolixibacteraceae;g__;s__
Otu001290	0	0	2	0	1	1	0	0	0	1	0	6	2	0	0	0	0	0	k__Bacteria;p__Firmicutes;c__Clostridia;o__Clostridiales;f__Ruminococcaceae;g__Ruminiclostridium_5
Otu001291	1	0	1	2	1	1	2	1	0	1	0	0	0	0	1	1	0	1	k__Bacteria;p__Bacteroidetes;c__Bacteroidia;o__Bacteroidales;f__Muribaculaceae
Otu001292	0	0	0	0	0	0	0	0	0	1	0	8	0	4	0	0	0	0	k__Bacteria;p__Firmicutes;c__Clostridia;o__Clostridiales;f__Lachnospiraceae;g__Lachnospiraceae_NK4A136_group;s__Lachnospiraceae_bacterium_A4
Otu001293	0	0	0	0	0	0	0	2	0	1	4	0	2	0	3	0	0	1	k__Bacteria;p__Bacteroidetes;c__Bacteroidia;o__Bacteroidales
Otu001294	0	0	3	0	0	0	0	0	3	0	2	0	5	0	0	0	0	0	k__Bacteria;p__Verrucomicrobia;c__Verrucomicrobiae;o__Opitutales;f__Opitutaceae;g__Alterococcus;s__
Otu001295	0	0	0	0	0	0	0	12	0	0	0	0	1	0	0	0	0	0	k__Bacteria;p__Firmicutes;c__Clostridia;o__Clostridiales;f__Ruminococcaceae
Otu001296	1	0	0	0	0	0	1	0	5	0	6	0	0	0	0	0	0	0	k__Bacteria;p__Gemmatimonadetes;c__BD2-11_terrestrial_group;o__;f__;g__;s__
Otu001297	1	0	1	0	2	1	0	1	2	2	1	1	1	0	0	0	0	0	k__Bacteria;p__Gemmatimonadetes;c__Gemmatimonadetes;o__Gemmatimonadales;f__Gemmatimonadaceae
Otu001298	1	0	0	0	0	0	0	1	3	1	0	7	0	0	0	0	0	0	k__Bacteria;p__Gemmatimonadetes;c__Gemmatimonadetes;o__Gemmatimonadales;f__Gemmatimonadaceae;g__;s__
Otu001299	1	2	3	0	0	0	0	1	6	0	0	0	0	0	0	0	0	0	k__Bacteria;p__Proteobacteria;c__Alphaproteobacteria;o__Rhizobiales;f__Rhizobiaceae;g__Aminobacter;s__
Otu001300	0	0	0	0	1	1	1	0	2	0	1	0	1	1	1	0	0	4	k__Bacteria;p__Proteobacteria;c__Gammaproteobacteria;o__Pseudomonadales;f__Moraxellaceae;g__Acinetobacter;s__Acinetobacter_radioresistens
Otu001301	0	1	1	1	1	0	1	1	2	0	0	0	5	0	0	0	0	0	k__Bacteria;p__Actinobacteria;c__Acidimicrobiia;o__Microtrichales;f__Ilumatobacteraceae;g__Ilumatobacter;s__
Otu001302	0	0	0	0	0	0	0	2	3	0	4	2	1	0	0	0	0	1	k__Bacteria;p__Proteobacteria;c__Alphaproteobacteria;o__Rhizobiales;f__Methyloligellaceae;g__;s__
Otu001303	0	0	2	0	0	0	0	2	1	6	2	0	0	0	0	0	0	0	k__Bacteria;p__Bacteroidetes;c__Bacteroidia;o__Sphingobacteriales;f__KD3-93;g__;s__
Otu001304	0	0	0	0	0	0	0	1	2	2	3	2	0	0	0	2	1	0	k__Bacteria;p__Proteobacteria;c__Gammaproteobacteria;o__Betaproteobacteriales;f__Burkholderiaceae
Otu001305	0	1	0	0	1	0	0	0	5	0	1	2	2	0	0	0	1	0	k__Bacteria;p__Acidobacteria;c__Subgroup_6;o__;f__;g__;s__
Otu001306	0	1	2	3	0	1	1	0	0	1	1	1	1	0	0	0	0	1	k__Bacteria;p__Firmicutes;c__Bacilli;o__Lactobacillales;f__Lactobacillaceae;g__Lactobacillus
Otu001307	2	1	0	2	0	0	0	1	0	0	0	1	0	2	1	3	0	0	k__Bacteria;p__Firmicutes;c__Erysipelotrichia;o__Erysipelotrichales;f__Erysipelotrichaceae;g__Erysipelatoclostridium
Otu001308	0	1	0	0	0	0	1	1	3	0	1	0	0	2	0	2	0	2	k__Bacteria;p__Bacteroidetes;c__Bacteroidia;o__Sphingobacteriales;f__Sphingobacteriaceae;g__Mucilaginibacter;s__Mucilaginibacter_sp_UR6-1
Otu001309	0	4	0	0	4	0	0	0	0	0	0	0	0	5	0	0	0	0	k__Bacteria;p__Firmicutes;c__Clostridia;o__Clostridiales;f__Lachnospiraceae
Otu001310	0	0	3	0	0	0	0	0	0	10	0	0	0	0	0	0	0	0	k__Bacteria;p__Firmicutes;c__Clostridia;o__Clostridiales;f__Ruminococcaceae
Otu001311	1	0	0	0	0	0	1	1	0	1	0	1	2	1	3	2	0	0	k__Bacteria;p__Bacteroidetes;c__Bacteroidia;o__Bacteroidales;f__Muribaculaceae;g__;s__
Otu001312	0	0	0	0	3	1	1	0	2	1	3	0	0	2	0	0	0	0	k__Bacteria;p__Chloroflexi;c__Gitt-GS-136;o__;f__;g__;s__
Otu001313	2	0	1	1	1	0	0	0	0	2	0	0	1	0	3	0	0	2	k__Bacteria;p__Bacteroidetes;c__Bacteroidia;o__Bacteroidales;f__Muribaculaceae;g__;s__
Otu001314	0	0	0	0	0	0	0	0	0	0	0	12	0	1	0	0	0	0	k__Bacteria;p__Firmicutes;c__Clostridia;o__Clostridiales;f__Ruminococcaceae;g__Ruminiclostridium;s__
Otu001315	0	0	4	0	0	0	0	0	0	0	0	1	7	0	0	0	0	1	k__Bacteria;p__Firmicutes;c__Clostridia;o__Clostridiales;f__Ruminococcaceae
Otu001316	1	0	0	0	0	0	0	1	6	0	0	0	3	0	0	2	0	0	k__Bacteria;p__Firmicutes;c__Bacilli;o__Lactobacillales;f__Streptococcaceae;g__Lactococcus;s__Lactococcus_garvieae_subsp_garvieae
Otu001317	0	3	1	1	1	2	0	2	2	0	0	0	0	0	1	0	0	0	k__Bacteria;p__Firmicutes;c__Clostridia;o__Clostridiales;f__Lachnospiraceae
Otu001318	0	0	1	0	1	0	0	1	0	0	2	1	2	1	0	0	3	1	k__Bacteria;p__Bacteroidetes;c__Bacteroidia;o__Chitinophagales;f__Saprospiraceae;g__;s__
Otu001319	0	0	0	0	1	1	0	0	0	0	0	0	0	0	0	2	9	0	k__Bacteria;p__Firmicutes;c__Clostridia;o__Clostridiales;f__Lachnospiraceae
Otu001320	1	1	0	0	0	0	0	0	2	1	4	3	0	0	0	0	0	1	k__Bacteria;p__Proteobacteria;c__Gammaproteobacteria;o__Xanthomonadales;f__Xanthomonadaceae;g__Stenotrophomonas
Otu001321	0	1	1	0	0	0	1	0	1	1	1	3	2	2	0	0	0	0	k__Bacteria;p__Bacteroidetes;c__Bacteroidia;o__Bacteroidales;f__ML635J-40_aquatic_group;g__;s__
Otu001322	0	0	0	0	0	0	3	3	0	0	2	0	0	0	0	0	0	5	k__Bacteria;p__Proteobacteria;c__Alphaproteobacteria
Otu001323	6	2	0	0	0	0	3	0	0	0	0	2	0	0	0	0	0	0	k__Bacteria;p__Firmicutes;c__Clostridia;o__Clostridiales;f__Ruminococcaceae;g__Ruminococcus_1
Otu001324	0	0	0	0	0	1	1	1	2	0	1	2	3	0	0	2	0	0	k__Bacteria;p__Proteobacteria;c__Alphaproteobacteria;o__Caulobacterales;f__Caulobacteraceae;g__Brevundimonas
Otu001325	0	4	0	1	0	0	0	1	0	3	4	0	0	0	0	0	0	0	k__Bacteria;p__Proteobacteria;c__Gammaproteobacteria;o__Betaproteobacteriales
Otu001326	0	4	0	0	0	0	0	0	1	0	2	0	0	0	0	3	2	1	k__Bacteria;p__Proteobacteria;c__Alphaproteobacteria;o__Reyranellales;f__Reyranellaceae;g__Reyranella;s__
Otu001327	0	0	2	0	0	0	1	8	0	0	0	0	0	0	0	0	0	2	k__Bacteria;p__Firmicutes;c__Clostridia;o__Clostridiales
Otu001328	0	1	1	2	0	1	1	1	0	2	0	0	1	0	1	0	1	1	k__Bacteria;p__Bacteroidetes;c__Bacteroidia;o__Bacteroidales;f__Muribaculaceae;g__;s__
Otu001329	0	0	0	2	0	1	0	4	1	0	0	0	0	1	0	1	1	2	k__Bacteria;p__Firmicutes;c__Clostridia;o__Clostridiales;f__Ruminococcaceae
Otu001330	1	1	0	0	1	0	3	0	3	0	1	0	3	0	0	0	0	0	k__Bacteria;p__Bacteroidetes;c__Bacteroidia;o__Bacteroidales;f__SB-5;g__;s__
Otu001331	0	0	0	1	0	0	0	0	8	0	1	0	1	0	1	1	0	0	k__Bacteria;p__Proteobacteria;c__Deltaproteobacteria;o__Myxococcales;f__Haliangiaceae;g__Haliangium;s__
Otu001332	1	1	0	0	0	0	0	1	3	0	1	4	0	2	0	0	0	0	k__Bacteria;p__Chloroflexi;c__Anaerolineae;o__Ardenticatenales;f__;g__;s__
Otu001333	1	1	0	0	2	0	0	0	2	1	4	1	0	1	0	0	0	0	k__Bacteria;p__Planctomycetes;c__Phycisphaerae;o__Tepidisphaerales;f__WD2101_soil_group;g__;s__
Otu001334	0	2	0	0	0	0	0	0	5	0	1	3	2	0	0	0	0	0	k__Bacteria;p__Proteobacteria;c__Alphaproteobacteria;o__Sphingomonadales;f__Sphingomonadaceae
Otu001335	3	2	0	0	2	0	3	0	0	0	0	0	0	0	0	0	2	1	k__Bacteria;p__Firmicutes;c__Clostridia;o__Clostridiales;f__Ruminococcaceae
Otu001336	0	1	0	2	0	2	0	5	0	0	0	0	0	3	0	0	0	0	k__Bacteria;p__Firmicutes;c__Clostridia;o__Clostridiales;f__Lachnospiraceae
Otu001337	0	4	0	1	2	0	0	0	2	0	3	0	0	0	0	0	1	0	k__Bacteria;p__Acidobacteria;c__Holophagae;o__Subgroup_7;f__;g__;s__
Otu001338	0	0	0	0	0	0	0	0	0	0	0	0	0	2	0	0	11	0	k__Bacteria;p__Firmicutes;c__Clostridia;o__Clostridiales;f__Ruminococcaceae;g__Ruminococcaceae_UCG-014;s__
Otu001339	0	0	0	0	3	0	0	0	6	0	0	0	1	3	0	0	0	0	k__Bacteria;p__Firmicutes;c__Clostridia;o__Clostridiales;f__Lachnospiraceae;g__Roseburia
Otu001340	1	3	0	0	0	0	1	0	3	2	1	0	0	0	0	0	0	2	k__Bacteria;p__Proteobacteria;c__Gammaproteobacteria;o__Betaproteobacteriales;f__Nitrosomonadaceae;g__IS-44;s__
Otu001341	3	0	0	0	0	0	1	0	3	2	3	1	0	0	0	0	0	0	k__Bacteria;p__Proteobacteria;c__Gammaproteobacteria;o__Xanthomonadales;f__Xanthomonadaceae
Otu001342	0	2	0	0	1	0	0	1	3	0	2	2	2	0	0	0	0	0	k__Bacteria;p__Acidobacteria;c__Acidobacteriia;o__Solibacterales;f__Solibacteraceae_Subgroup_3;g__PAUC26f;s__
Otu001343	0	1	0	0	0	0	0	5	2	0	1	0	1	0	0	3	0	0	k__Bacteria;p__Firmicutes;c__Clostridia;o__Clostridiales;f__Eubacteriaceae;g__Anaerofustis;s__Anaerofustis_stercorihominis_DSM_17244
Otu001344	2	1	0	0	1	3	0	1	2	0	0	2	1	0	0	0	0	0	k__Bacteria;p__Bacteroidetes;c__Bacteroidia;o__Cytophagales;f__Microscillaceae;g__Ohtaekwangia;s__
Otu001345	0	0	1	2	0	0	0	3	1	0	1	0	1	1	1	1	0	1	k__Bacteria;p__Bacteroidetes;c__Bacteroidia;o__Bacteroidales;f__Marinifilaceae;g__Odoribacter
Otu001346	0	1	2	5	0	0	0	0	0	0	1	1	0	1	0	1	0	1	k__Bacteria;p__Firmicutes;c__Bacilli;o__Lactobacillales;f__Lactobacillaceae;g__Lactobacillus
Otu001347	1	0	1	0	0	0	0	1	2	1	2	0	5	0	0	0	0	0	k__Bacteria;p__Proteobacteria;c__Deltaproteobacteria;o__Myxococcales;f__Haliangiaceae;g__Haliangium;s__
Otu001348	0	0	0	0	6	0	0	0	0	2	0	0	0	5	0	0	0	0	k__Bacteria;p__Firmicutes;c__Clostridia;o__Clostridiales;f__Lachnospiraceae
Otu001349	0	1	0	0	0	0	0	0	0	4	2	0	2	0	1	1	0	1	k__Bacteria;p__Bacteroidetes;c__Bacteroidia;o__Bacteroidales;f__Muribaculaceae;g__;s__
Otu001350	1	0	0	0	1	1	0	0	1	1	2	1	0	0	0	2	0	2	k__Bacteria;p__Bacteroidetes;c__Bacteroidia;o__Bacteroidales;f__Muribaculaceae;g__;s__
Otu001351	1	0	0	0	0	0	2	0	1	1	4	0	3	0	0	0	0	0	k__Bacteria;p__Actinobacteria;c__Actinobacteria;o__Micrococcales;f__Microbacteriaceae;g__Agromyces
Otu001352	0	0	2	0	1	0	0	1	2	2	0	1	1	0	0	0	2	0	k__Bacteria;p__Bacteroidetes;c__Bacteroidia;o__Bacteroidales;f__Muribaculaceae
Otu001353	1	0	0	0	0	0	0	0	4	2	3	0	1	1	0	0	0	0	k__Bacteria;p__Proteobacteria;c__Gammaproteobacteria;o__Xanthomonadales;f__Xanthomonadaceae;g__Arenimonas;s__
Otu001354	0	1	0	0	2	0	0	0	3	0	0	3	1	1	0	0	1	0	k__Bacteria;p__Proteobacteria;c__Alphaproteobacteria;o__Rhizobiales;f__Xanthobacteraceae
Otu001355	0	0	0	0	1	0	1	1	4	3	0	1	1	0	0	0	0	0	k__Bacteria;p__Gemmatimonadetes;c__Gemmatimonadetes;o__Gemmatimonadales;f__Gemmatimonadaceae;g__;s__
Otu001356	0	0	0	0	8	0	0	0	1	1	0	2	0	0	0	0	0	0	k__Bacteria;p__Firmicutes;c__Clostridia;o__Clostridiales;f__Lachnospiraceae;g__Lachnospiraceae_NK4A136_group
Otu001357	1	1	1	0	0	0	0	0	3	0	2	0	3	0	0	0	1	0	k__Bacteria;p__Proteobacteria;c__Gammaproteobacteria;o__Xanthomonadales;f__Rhodanobacteraceae
Otu001358	0	0	0	1	1	0	0	0	0	0	5	0	1	0	0	0	1	3	k__Bacteria;p__Actinobacteria;c__Actinobacteria;o__Pseudonocardiales;f__Pseudonocardiaceae;g__Pseudonocardia
Otu001359	0	0	0	1	0	0	0	1	5	1	0	3	1	0	0	0	0	0	k__Bacteria;p__Bacteroidetes;c__Bacteroidia;o__Chitinophagales;f__Saprospiraceae;g__;s__
Otu001360	0	0	0	0	0	0	0	0	9	0	2	1	0	0	0	0	0	0	k__Bacteria
Otu001361	0	0	0	0	2	0	2	0	0	0	0	7	0	1	0	0	0	0	k__Bacteria;p__Firmicutes;c__Clostridia;o__Clostridiales;f__Lachnospiraceae;g__GCA-900066575;s__
Otu001362	0	0	1	1	1	0	1	0	5	2	0	0	1	0	0	0	0	0	k__Bacteria;p__Proteobacteria;c__Gammaproteobacteria;o__Methylococcales;f__Methylomonaceae;g__Methylobacter;s__
Otu001363	2	0	2	0	0	0	0	0	2	2	2	2	0	0	0	0	0	0	k__Bacteria;p__Acidobacteria;c__Holophagae;o__Subgroup_7;f__;g__;s__
Otu001364	0	0	0	0	2	0	0	0	5	0	2	0	2	1	0	0	0	0	k__Bacteria;p__Bacteroidetes;c__Bacteroidia;o__Cytophagales;f__Hymenobacteraceae;g__Hymenobacter
Otu001365	1	1	0	0	0	0	0	0	2	4	2	0	2	0	0	0	0	0	k__Bacteria;p__Chloroflexi;c__Anaerolineae;o__Anaerolineales;f__Anaerolineaceae;g__;s__
Otu001366	8	0	0	0	2	0	0	0	0	0	2	0	0	0	0	0	0	0	k__Bacteria;p__Tenericutes;c__Mollicutes;o__Mollicutes_RF39;f__;g__;s__
Otu001367	0	0	1	0	0	2	0	0	0	2	0	1	0	3	1	2	0	0	k__Bacteria;p__Bacteroidetes;c__Bacteroidia;o__Bacteroidales;f__Muribaculaceae
Otu001368	0	2	0	0	1	3	0	0	1	0	1	0	1	0	0	1	2	0	k__Bacteria;p__Bacteroidetes;c__Bacteroidia;o__Bacteroidales;f__Muribaculaceae;g__;s__
Otu001369	0	1	1	1	1	0	0	4	0	0	0	2	0	0	0	1	0	1	k__Bacteria;p__Bacteroidetes;c__Bacteroidia;o__Bacteroidales;f__Rikenellaceae;g__Alistipes
Otu001370	0	0	0	0	2	1	1	0	0	0	0	2	0	1	4	1	0	0	k__Bacteria;p__Firmicutes;c__Clostridia;o__Clostridiales;f__Ruminococcaceae
Otu001371	0	0	0	2	1	0	1	0	0	1	0	1	4	0	0	0	1	1	k__Bacteria;p__Firmicutes;c__Clostridia;o__Clostridiales;f__Ruminococcaceae
Otu001372	0	0	0	0	0	0	1	0	2	0	7	1	0	0	0	0	0	1	k__Bacteria;p__Proteobacteria;c__Gammaproteobacteria;o__Betaproteobacteriales;f__SC-I-84
Otu001373	0	0	1	2	0	4	0	0	0	1	0	0	0	0	3	1	0	0	k__Bacteria;p__Firmicutes;c__Clostridia;o__Clostridiales;f__Ruminococcaceae;g__Eubacterium_coprostanoligenes_group
Otu001374	0	1	0	1	1	0	0	0	0	2	0	0	2	3	0	2	0	0	k__Bacteria;p__Bacteroidetes;c__Bacteroidia;o__Bacteroidales;f__Muribaculaceae;g__;s__
Otu001375	1	2	1	0	0	0	0	0	4	3	0	0	1	0	0	0	0	0	k__Bacteria;p__Bacteroidetes;c__Bacteroidia;o__Chitinophagales;f__Chitinophagaceae
Otu001376	2	1	0	2	3	0	0	0	0	2	0	2	0	0	0	0	0	0	k__Bacteria;p__Firmicutes;c__Clostridia;o__Clostridiales;f__Ruminococcaceae;g__Acetanaerobacterium;s__
Otu001377	0	1	0	0	0	0	0	0	2	0	8	1	0	0	0	0	0	0	k__Bacteria;p__Gemmatimonadetes;c__Gemmatimonadetes;o__Gemmatimonadales;f__Gemmatimonadaceae;g__;s__
Otu001378	0	0	0	3	0	0	1	2	0	0	2	1	0	0	0	3	0	0	k__Bacteria;p__Firmicutes;c__Clostridia;o__Clostridiales;f__Lachnospiraceae
Otu001379	2	0	0	2	1	0	0	1	6	0	0	0	0	0	0	0	0	0	k__Bacteria;p__Proteobacteria;c__Gammaproteobacteria;o__Enterobacteriales;f__Enterobacteriaceae;g__Escherichia-Shigella
Otu001380	1	1	0	0	0	1	0	0	2	0	5	0	2	0	0	0	0	0	k__Bacteria;p__Gemmatimonadetes;c__S0134_terrestrial_group;o__;f__;g__;s__
Otu001381	0	0	0	0	0	0	0	1	1	0	5	1	1	0	1	0	2	0	k__Bacteria;p__Latescibacteria;c__Latescibacteria;o__Latescibacterales;f__Latescibacteraceae;g__;s__
Otu001382	1	0	0	0	1	0	0	0	6	0	2	1	1	0	0	0	0	0	k__Bacteria;p__Chloroflexi;c__Dehalococcoidia;o__S085;f__;g__;s__
Otu001383	0	0	0	0	0	0	0	0	3	2	4	1	0	0	0	0	1	1	k__Bacteria;p__Gemmatimonadetes;c__Gemmatimonadetes;o__Gemmatimonadales;f__Gemmatimonadaceae;g__;s__
Otu001384	0	0	1	0	0	0	0	2	5	3	0	0	1	0	0	0	0	0	k__Bacteria;p__Proteobacteria;c__Deltaproteobacteria;o__Myxococcales;f__BIrii41;g__;s__
Otu001385	0	0	0	3	0	0	1	0	2	0	0	0	0	2	0	1	1	2	k__Bacteria;p__Bacteroidetes;c__Bacteroidia;o__Bacteroidales;f__Muribaculaceae;g__;s__
Otu001386	2	1	0	0	1	1	1	0	1	1	1	0	1	0	0	0	1	1	k__Bacteria;p__Bacteroidetes;c__Bacteroidia;o__Bacteroidales;f__Muribaculaceae
Otu001387	0	1	1	0	0	0	0	0	3	3	2	0	2	0	0	0	0	0	k__Bacteria;p__Acidobacteria;c__Acidobacteriia;o__Solibacterales;f__Solibacteraceae_Subgroup_3;g__PAUC26f;s__
Otu001388	0	0	0	0	1	0	0	0	3	1	3	2	2	0	0	0	0	0	k__Bacteria;p__Actinobacteria;c__Thermoleophilia;o__Gaiellales
Otu001389	0	4	0	0	0	0	0	0	1	1	4	0	0	2	0	0	0	0	k__Bacteria
Otu001390	0	0	2	0	1	2	0	0	2	1	1	2	0	1	0	0	0	0	k__Bacteria;p__Actinobacteria;c__Thermoleophilia;o__Solirubrobacterales;f__67-14;g__;s__
Otu001391	0	0	0	0	0	1	0	0	1	0	5	0	0	2	0	2	0	1	k__Bacteria;p__Proteobacteria;c__Deltaproteobacteria;o__NB1-j;f__;g__;s__
Otu001392	0	0	0	0	0	0	0	0	0	1	3	8	0	0	0	0	0	0	k__Bacteria;p__Bacteroidetes;c__Bacteroidia;o__Bacteroidales;f__Muribaculaceae;g__;s__
Otu001393	0	0	1	2	0	2	0	0	0	1	1	0	0	2	0	3	0	0	k__Bacteria;p__Bacteroidetes;c__Bacteroidia;o__Bacteroidales;f__Muribaculaceae;g__;s__
Otu001394	0	2	0	2	1	0	1	0	5	0	0	0	1	0	0	0	0	0	k__Bacteria;p__Chloroflexi;c__Anaerolineae;o__Anaerolineales;f__Anaerolineaceae;g__;s__
Otu001395	1	3	0	0	0	0	1	0	0	1	0	1	0	3	1	0	1	0	k__Bacteria;p__Bacteroidetes;c__Bacteroidia;o__Bacteroidales
Otu001396	1	1	0	0	0	0	2	1	2	2	0	2	1	0	0	0	0	0	k__Bacteria;p__Chloroflexi;c__Anaerolineae;o__Anaerolineales;f__Anaerolineaceae;g__Anaerolinea;s__
Otu001397	0	1	0	0	0	0	0	0	7	0	3	0	1	0	0	0	0	0	k__Bacteria;p__Planctomycetes;c__Planctomycetacia;o__Pirellulales;f__Pirellulaceae;g__Pirellula;s__
Otu001398	3	0	0	0	1	1	1	0	0	0	1	0	1	2	0	0	2	0	k__Bacteria;p__Bacteroidetes;c__Bacteroidia;o__Bacteroidales;f__Muribaculaceae;g__;s__
Otu001399	3	0	0	0	0	2	2	0	1	1	2	0	1	0	0	0	0	0	k__Bacteria;p__Proteobacteria;c__Deltaproteobacteria;o__Desulfobacterales;f__Desulfobulbaceae
Otu001400	2	0	3	0	1	0	0	1	2	0	0	0	3	0	0	0	0	0	k__Bacteria;p__Proteobacteria;c__Gammaproteobacteria;o__Betaproteobacteriales;f__Burkholderiaceae;g__Hydrogenophaga
Otu001401	2	1	0	0	0	0	1	0	4	2	0	0	0	1	0	0	0	1	k__Bacteria;p__Acidobacteria;c__Acidobacteriia;o__Acidobacteriales
Otu001402	0	0	0	0	1	0	0	0	2	2	5	0	2	0	0	0	0	0	k__Bacteria;p__Planctomycetes;c__Planctomycetacia;o__Pirellulales;f__Pirellulaceae;g__Blastopirellula;s__
Otu001403	0	0	0	1	0	0	2	1	1	1	4	1	1	0	0	0	0	0	k__Bacteria;p__Proteobacteria;c__Alphaproteobacteria;o__Sphingomonadales;f__Sphingomonadaceae;g__Sphingopyxis;s__Sphingopyxis_granuli
Otu001404	2	0	0	0	0	0	0	0	2	4	3	0	1	0	0	0	0	0	k__Bacteria;p__Proteobacteria;c__Alphaproteobacteria;o__Sphingomonadales;f__Sphingomonadaceae;g__Altererythrobacter
Otu001405	0	1	0	0	4	0	0	0	0	0	0	0	6	0	1	0	0	0	k__Bacteria;p__Actinobacteria;c__Coriobacteriia;o__Coriobacteriales;f__Eggerthellaceae;g__Eggerthella;s__Eggerthella_lenta
Otu001406	0	1	0	3	0	0	0	0	2	0	2	0	2	0	0	1	1	0	k__Bacteria;p__Planctomycetes;c__Planctomycetacia;o__Pirellulales;f__Pirellulaceae;g__Pir4_lineage;s__
Otu001407	0	2	0	0	0	0	0	1	0	0	4	0	0	1	0	0	1	2	k__Bacteria;p__Proteobacteria;c__Gammaproteobacteria;o__Betaproteobacteriales;f__Nitrosomonadaceae;g__MND1;s__
Otu001408	0	0	0	0	0	1	0	0	3	1	0	4	1	1	0	0	0	0	k__Bacteria;p__Proteobacteria;c__Gammaproteobacteria;o__Aeromonadales;f__Aeromonadaceae;g__Aeromonas
Otu001409	2	4	0	0	1	2	1	0	0	0	0	0	0	1	0	0	0	0	k__Bacteria;p__Acidobacteria;c__Subgroup_17;o__;f__;g__;s__
Otu001410	0	0	0	0	0	0	0	0	7	0	0	0	0	2	0	2	0	0	k__Bacteria;p__Firmicutes;c__Clostridia;o__Clostridiales;f__Lachnospiraceae
Otu001411	0	0	0	0	2	0	1	3	0	0	1	0	0	4	0	0	0	0	k__Bacteria;p__Firmicutes;c__Clostridia;o__Clostridiales;f__Clostridiales_vadinBB60_group;g__;s__
Otu001412	0	0	0	0	1	0	2	0	3	2	2	0	0	0	0	0	0	1	k__Bacteria;p__Planctomycetes;c__OM190;o__;f__;g__;s__
Otu001413	0	0	0	1	1	0	1	0	7	0	0	0	0	1	0	0	0	0	k__Bacteria;p__Proteobacteria;c__Deltaproteobacteria;o__Myxococcales;f__bacteriap25
Otu001414	1	0	0	0	0	0	0	0	5	4	0	1	0	0	0	0	0	0	k__Bacteria;p__Bacteroidetes;c__Bacteroidia;o__Cytophagales;f__Microscillaceae
Otu001415	0	0	0	2	4	1	1	0	0	1	0	0	0	1	0	0	0	1	k__Bacteria;p__Firmicutes;c__Clostridia;o__Clostridiales;f__Ruminococcaceae
Otu001416	0	0	4	0	0	0	0	0	1	0	5	0	0	1	0	0	0	0	k__Bacteria;p__Planctomycetes;c__Phycisphaerae;o__Tepidisphaerales;f__WD2101_soil_group;g__;s__
Otu001417	1	0	1	0	0	0	0	1	0	1	2	0	0	0	0	3	1	1	k__Bacteria;p__Bacteroidetes;c__Bacteroidia;o__Bacteroidales;f__Muribaculaceae;g__;s__
Otu001418	0	1	1	0	1	1	0	0	2	0	0	1	4	0	0	0	0	0	k__Bacteria;p__Proteobacteria;c__Alphaproteobacteria;o__Rhizobiales;f__Hyphomicrobiaceae;g__Hyphomicrobium
Otu001419	0	0	0	2	0	1	0	0	3	0	4	1	0	0	0	0	0	0	k__Bacteria;p__Proteobacteria;c__Gammaproteobacteria;o__Betaproteobacteriales;f__Nitrosomonadaceae;g__MND1;s__
Otu001420	1	0	1	0	5	0	0	2	0	0	0	0	1	0	0	0	0	1	k__Bacteria;p__Firmicutes;c__Clostridia;o__Clostridiales;f__Ruminococcaceae
Otu001421	1	0	0	0	1	0	3	0	3	0	1	0	2	0	0	0	0	0	k__Bacteria;p__Bacteroidetes;c__Bacteroidia;o__Bacteroidales;f__Bacteroidetes_vadinHA17;g__;s__
Otu001422	2	1	3	1	0	1	0	1	0	0	0	0	0	1	0	0	1	0	k__Bacteria;p__Bacteroidetes;c__Bacteroidia;o__Bacteroidales;f__Rikenellaceae;g__Alistipes
Otu001423	0	2	2	0	2	1	1	1	0	0	0	1	1	0	0	0	0	0	k__Bacteria;p__Firmicutes;c__Clostridia;o__Clostridiales;f__Ruminococcaceae;g__UBA1819;s__
Otu001424	4	0	0	1	0	0	0	0	1	0	1	0	2	0	0	2	0	0	k__Bacteria;p__Acidobacteria;c__Thermoanaerobaculia;o__Thermoanaerobaculales;f__Thermoanaerobaculaceae;g__Subgroup_10;s__
Otu001425	1	2	1	0	0	0	0	0	4	0	1	0	2	0	0	0	0	0	k__Bacteria;p__Proteobacteria;c__Deltaproteobacteria;o__Desulfuromonadales;f__Geobacteraceae;g__Geobacter;s__Geobacter_metallireducens_GS-15
Otu001426	1	0	0	0	0	1	0	0	6	1	0	1	1	0	0	0	0	0	k__Bacteria;p__Proteobacteria;c__Gammaproteobacteria;o__Alteromonadales;f__Shewanellaceae;g__Shewanella
Otu001427	0	0	0	1	0	0	0	0	0	2	0	1	2	0	3	2	0	0	k__Bacteria;p__Bacteroidetes;c__Bacteroidia;o__Bacteroidales;f__Muribaculaceae;g__;s__
Otu001428	1	2	0	0	0	2	1	0	0	0	0	1	1	2	0	0	1	0	k__Bacteria;p__Bacteroidetes;c__Bacteroidia;o__Bacteroidales;f__Muribaculaceae;g__;s__
Otu001429	0	2	0	0	0	1	0	0	1	0	0	0	0	0	0	0	3	4	k__Bacteria;p__Firmicutes;c__Erysipelotrichia;o__Erysipelotrichales;f__Erysipelotrichaceae;g__Faecalibaculum;s__
Otu001430	1	0	0	0	0	0	0	0	5	1	2	1	1	0	0	0	0	0	k__Bacteria;p__Chloroflexi;c__Chloroflexia;o__Thermomicrobiales;f__AKYG1722;g__;s__
Otu001431	0	1	0	0	0	1	0	0	4	1	2	1	1	0	0	0	0	0	k__Bacteria;p__Actinobacteria;c__Actinobacteria;o__Corynebacteriales;f__Mycobacteriaceae;g__Mycobacterium
Otu001432	2	0	1	1	0	0	1	0	0	2	0	0	1	0	0	0	3	0	k__Bacteria;p__Bacteroidetes;c__Bacteroidia;o__Bacteroidales;f__Muribaculaceae;g__;s__
Otu001433	0	0	0	0	0	2	0	1	1	0	1	1	0	1	0	0	4	0	k__Bacteria;p__Firmicutes;c__Clostridia;o__Clostridiales;f__Lachnospiraceae
Otu001434	2	0	0	2	0	0	0	0	3	1	1	0	2	0	0	0	0	0	k__Bacteria;p__Proteobacteria;c__Alphaproteobacteria;o__Rhodospirillales;f__Rhodopirillaceae;g__Defluviicoccus;s__
Otu001435	0	0	1	0	3	0	0	0	1	0	5	0	1	0	0	0	0	0	k__Bacteria;p__Acidobacteria;c__Thermoanaerobaculia;o__Thermoanaerobaculales;f__Thermoanaerobaculaceae;g__Subgroup_10
Otu001436	3	0	3	0	0	1	0	0	2	0	0	1	1	0	0	0	0	0	k__Bacteria;p__Firmicutes;c__Clostridia;o__Clostridiales;f__Lachnospiraceae;g__Lachnospiraceae_NK4A136_group
Otu001437	1	1	0	0	0	0	0	0	1	2	1	0	1	1	2	0	0	1	k__Bacteria;p__Proteobacteria;c__Deltaproteobacteria;o__NB1-j;f__;g__;s__
Otu001438	0	0	0	0	3	0	0	0	4	0	0	0	0	4	0	0	0	0	k__Bacteria;p__Firmicutes;c__Clostridia;o__Clostridiales;f__Lachnospiraceae
Otu001439	0	0	0	0	0	0	0	3	0	0	5	0	0	3	0	0	0	0	k__Bacteria;p__Acidobacteria;c__Subgroup_6
Otu001440	2	0	0	0	0	0	3	0	0	0	0	1	1	0	0	0	3	1	k__Bacteria;p__Actinobacteria;c__Coriobacteriia;o__Coriobacteriales;f__Eggerthellaceae;g__Parvibacter;s__
Otu001441	0	0	0	0	1	0	0	1	1	0	4	1	0	0	0	1	0	2	k__Bacteria;p__Proteobacteria;c__Gammaproteobacteria;o__Betaproteobacteriales;f__Rhodocyclaceae;g__Azoarcus
Otu001442	1	0	0	0	0	0	0	2	4	2	0	0	2	0	0	0	0	0	k__Bacteria;p__Bacteroidetes;c__Bacteroidia;o__Cytophagales;f__Microscillaceae;g__Ohtaekwangia;s__
Otu001443	2	1	1	1	1	0	0	0	0	0	0	0	1	0	2	1	1	0	k__Bacteria;p__Bacteroidetes;c__Bacteroidia;o__Bacteroidales;f__Rikenellaceae;g__Alistipes
Otu001444	0	0	0	0	0	2	1	0	1	0	3	0	0	0	1	0	2	1	k__Bacteria;p__Bacteroidetes;c__Bacteroidia;o__Bacteroidales;f__Muribaculaceae;g__;s__
Otu001445	0	0	0	1	0	0	1	0	3	1	5	0	0	0	0	0	0	0	k__Bacteria;p__Proteobacteria;c__Gammaproteobacteria;o__Betaproteobacteriales;f__SC-I-84;g__;s__
Otu001446	0	4	0	0	0	0	0	0	5	0	1	0	1	0	0	0	0	0	k__Bacteria;p__Gemmatimonadetes;c__Gemmatimonadetes;o__Gemmatimonadales;f__Gemmatimonadaceae;g__;s__
Otu001447	0	1	0	0	7	0	0	0	0	0	0	0	2	0	0	0	0	1	k__Bacteria;p__Firmicutes;c__Clostridia;o__Clostridiales;f__Ruminococcaceae;g__Ruminococcaceae_UCG-014;s__
Otu001448	1	0	1	1	0	0	2	0	0	1	0	0	0	0	1	0	2	2	k__Bacteria;p__Bacteroidetes;c__Bacteroidia;o__Bacteroidales;f__Muribaculaceae
Otu001449	1	0	2	0	0	1	1	0	0	1	0	0	2	0	2	0	1	0	k__Bacteria;p__Bacteroidetes;c__Bacteroidia;o__Bacteroidales;f__Muribaculaceae;g__;s__
Otu001450	0	1	2	0	1	0	0	0	3	2	1	0	1	0	0	0	0	0	k__Bacteria;p__Bacteroidetes;c__Bacteroidia;o__Chitinophagales;f__Saprospiraceae;g__Phaeodactylibacter;s__
Otu001451	0	2	0	0	0	0	0	0	2	2	1	2	1	1	0	0	0	0	k__Bacteria;p__Proteobacteria;c__Gammaproteobacteria;o__Betaproteobacteriales;f__Rhodocyclaceae;g__Denitratisoma;s__
Otu001452	0	0	1	0	0	0	2	1	0	1	0	2	1	1	0	1	0	1	k__Bacteria;p__Bacteroidetes;c__Bacteroidia;o__Bacteroidales;f__Muribaculaceae
Otu001453	2	1	0	1	0	0	1	0	2	0	0	1	3	0	0	0	0	0	k__Bacteria;p__Bacteroidetes;c__Bacteroidia;o__Sphingobacteriales;f__envOPS_17;g__;s__
Otu001454	1	0	0	1	0	0	1	1	0	1	0	0	3	1	1	1	0	0	k__Bacteria;p__Bacteroidetes;c__Bacteroidia;o__Bacteroidales;f__Muribaculaceae;g__;s__
Otu001455	1	1	0	0	0	0	0	1	0	1	0	1	2	0	1	1	1	1	k__Bacteria;p__Bacteroidetes;c__Bacteroidia;o__Bacteroidales;f__Muribaculaceae;g__;s__
Otu001456	0	2	0	0	4	0	0	1	1	0	0	0	3	0	0	0	0	0	k__Bacteria;p__Chloroflexi;c__Anaerolineae;o__Anaerolineales;f__Anaerolineaceae;g__Levilinea;s__
Otu001457	0	2	0	0	0	0	0	0	2	1	3	2	0	1	0	0	0	0	k__Bacteria;p__Planctomycetes;c__Planctomycetacia;o__Planctomycetales;f__;g__;s__
Otu001458	1	0	2	1	0	0	1	0	2	1	2	0	1	0	0	0	0	0	k__Bacteria;p__Fibrobacteres;c__Fibrobacteria;o__Fibrobacterales;f__Fibrobacteraceae;g__;s__
Otu001459	1	0	1	1	1	0	1	2	0	1	0	0	1	0	1	0	0	1	k__Bacteria;p__Bacteroidetes;c__Bacteroidia;o__Bacteroidales;f__Rikenellaceae;g__Alistipes
Otu001460	0	0	1	0	0	0	0	0	1	0	5	0	1	0	0	0	0	3	k__Bacteria;p__Acidobacteria;c__Blastocatellia_Subgroup_4;o__Blastocatellales;f__Blastocatellaceae;g__JGI_0001001-H03;s__
Otu001461	0	0	4	0	0	0	0	0	0	1	1	5	0	0	0	0	0	0	k__Bacteria;p__Firmicutes;c__Clostridia;o__Clostridiales;f__Ruminococcaceae
Otu001462	0	1	0	0	0	0	0	0	0	0	6	0	0	0	0	0	3	1	k__Bacteria;p__Proteobacteria;c__Alphaproteobacteria;o__Sphingomonadales;f__Sphingomonadaceae;g__Sphingobium;s__
Otu001463	0	4	5	0	0	0	0	0	0	1	1	0	0	0	0	0	0	0	k__Bacteria;p__Gemmatimonadetes;c__Longimicrobia;o__Longimicrobiales;f__Longimicrobiaceae;g__;s__
Otu001464	1	0	0	0	0	0	0	0	4	2	0	2	1	1	0	0	0	0	k__Bacteria;p__Proteobacteria;c__Alphaproteobacteria;o__Rhizobiales;f__Beijerinckiaceae;g__Bosea;s__
Otu001465	0	0	1	0	0	3	1	0	3	0	3	0	0	0	0	0	0	0	k__Bacteria
Otu001466	1	0	1	0	1	0	1	0	2	0	2	0	1	0	0	2	0	0	k__Bacteria;p__Proteobacteria;c__Gammaproteobacteria;o__Salinisphaerales;f__Solimonadaceae;g__Polycyclovorans;s__
Otu001467	0	1	0	1	0	0	1	0	0	0	1	0	0	3	0	0	3	1	k__Bacteria;p__Acidobacteria;c__Subgroup_22;o__;f__;g__;s__
Otu001468	0	0	4	0	0	0	0	0	4	2	0	0	1	0	0	0	0	0	k__Bacteria;p__Chloroflexi;c__Anaerolineae;o__Anaerolineales;f__Anaerolineaceae;g__;s__
Otu001469	0	1	1	0	4	0	0	3	0	0	0	0	0	0	0	0	2	0	k__Bacteria;p__Firmicutes;c__Clostridia;o__Clostridiales;f__Ruminococcaceae;g__Ruminococcaceae_UCG-014;s__
Otu001470	0	1	1	0	0	0	0	0	2	1	2	1	2	0	1	0	0	0	k__Bacteria;p__Proteobacteria;c__Gammaproteobacteria;o__Betaproteobacteriales
Otu001471	0	0	2	0	1	2	1	0	1	0	1	0	3	0	0	0	0	0	k__Bacteria;p__Proteobacteria;c__Gammaproteobacteria;o__Betaproteobacteriales;f__Burkholderiaceae;g__Lautropia;s__
Otu001472	0	0	3	1	1	0	0	0	0	0	0	3	2	1	0	0	0	0	k__Bacteria;p__Firmicutes;c__Clostridia;o__Clostridiales;f__Ruminococcaceae
Otu001473	0	0	3	0	1	0	0	0	0	1	1	1	0	0	0	3	0	1	k__Bacteria;p__Bacteroidetes;c__Bacteroidia;o__Bacteroidales;f__Muribaculaceae;g__;s__
Otu001474	0	0	0	0	0	0	1	0	0	1	3	0	1	1	0	2	1	1	k__Bacteria;p__Bacteroidetes;c__Bacteroidia;o__Bacteroidales;f__Muribaculaceae;g__;s__
Otu001475	0	0	0	0	0	1	0	0	2	0	0	0	1	3	1	0	1	2	k__Bacteria;p__Proteobacteria;c__Alphaproteobacteria;o__Sphingomonadales;f__Sphingomonadaceae;g__Sphingomonas
Otu001476	0	0	0	1	0	0	0	0	8	0	0	0	2	0	0	0	0	0	k__Bacteria;p__Proteobacteria;c__Alphaproteobacteria;o__Rhizobiales;f__Methyloligellaceae;g__;s__
Otu001477	0	0	0	0	0	4	3	0	1	0	3	0	0	0	0	0	0	0	k__Bacteria;p__Firmicutes;c__Clostridia;o__Clostridiales;f__Lachnospiraceae;g__Tyzzerella_3
Otu001478	0	0	0	0	0	0	2	0	0	4	0	1	0	0	0	4	0	0	k__Bacteria;p__Bacteroidetes;c__Bacteroidia;o__Bacteroidales;f__Muribaculaceae
Otu001479	1	0	0	0	0	1	0	2	2	0	3	1	1	0	0	0	0	0	k__Bacteria;p__Proteobacteria;c__Gammaproteobacteria;o__Steroidobacterales;f__Woeseiaceae;g__Woeseia;s__
Otu001480	0	0	0	0	1	0	0	1	8	0	0	0	1	0	0	0	0	0	k__Bacteria;p__Chloroflexi;c__Anaerolineae;o__Anaerolineales;f__Anaerolineaceae;g__;s__
Otu001481	1	1	1	0	1	0	1	0	3	0	0	1	1	0	0	0	1	0	k__Bacteria;p__Proteobacteria;c__Gammaproteobacteria;o__Methylococcales;f__Methylomonaceae;g__Methylomicrobium;s__
Otu001482	0	1	0	0	0	0	0	0	3	0	2	0	5	0	0	0	0	0	k__Bacteria;p__Chloroflexi;c__Anaerolineae;o__Anaerolineales;f__Anaerolineaceae;g__Anaerolinea;s__Thermobaculum_sp_enrichment_culture_clone_VanCtr100
Otu001483	1	0	0	0	0	0	1	0	2	1	4	0	2	0	0	0	0	0	k__Bacteria;p__Acidobacteria;c__Acidobacteriia;o__Solibacterales;f__Solibacteraceae_Subgroup_3;g__Bryobacter;s__
Otu001484	1	0	1	0	0	0	0	0	1	0	0	0	1	1	1	5	0	0	k__Bacteria;p__Bacteroidetes;c__Bacteroidia;o__Bacteroidales;f__Muribaculaceae;g__;s__
Otu001485	2	0	2	0	0	0	1	0	0	2	0	0	0	0	0	0	0	4	k__Bacteria;p__Firmicutes;c__Clostridia;o__Clostridiales
Otu001486	1	1	0	0	0	0	0	2	3	2	2	0	0	0	0	0	0	0	k__Bacteria;p__Proteobacteria;c__Alphaproteobacteria;o__Rhizobiales;f__Hyphomicrobiaceae;g__Pedomicrobium;s__
Otu001487	0	0	0	0	0	0	0	0	4	0	4	0	1	2	0	0	0	0	k__Bacteria;p__Bacteroidetes;c__Bacteroidia;o__Chitinophagales;f__Saprospiraceae;g__;s__
Otu001488	0	1	0	0	1	1	0	3	0	0	0	0	0	2	0	0	1	1	k__Bacteria;p__Bacteroidetes;c__Bacteroidia;o__Bacteroidales;f__Rikenellaceae;g__Alistipes
Otu001489	0	0	1	1	0	0	0	0	3	3	1	1	0	0	0	0	0	0	k__Bacteria;p__Proteobacteria;c__Alphaproteobacteria;o__Rhizobiales;f__Amb-16S-1323;g__;s__
Otu001490	0	0	0	0	2	7	0	0	0	0	0	0	1	0	0	0	0	0	k__Bacteria;p__Firmicutes;c__Clostridia;o__Clostridiales;f__Ruminococcaceae
Otu001491	0	1	0	0	6	0	1	0	0	0	0	1	0	0	0	0	0	1	k__Bacteria;p__Firmicutes;c__Clostridia;o__Clostridiales;f__Ruminococcaceae
Otu001492	0	1	1	0	0	1	0	0	3	0	2	1	1	0	0	0	0	0	k__Bacteria;p__Planctomycetes;c__Planctomycetacia;o__Gemmatales;f__Gemmataceae;g__Gemmata;s__
Otu001493	1	2	0	0	0	0	0	0	6	1	0	0	0	0	0	0	0	0	k__Bacteria
Otu001494	0	2	0	0	0	0	0	0	0	1	0	1	0	3	1	1	1	0	k__Bacteria;p__Bacteroidetes;c__Bacteroidia;o__Bacteroidales;f__Muribaculaceae;g__;s__
Otu001495	0	0	0	0	0	0	1	1	3	0	0	0	0	2	1	0	0	2	k__Bacteria;p__Nitrospirae;c__Nitrospira;o__Nitrospirales;f__Nitrospiraceae;g__Nitrospira;s__Nitrospira_sp_OLB3
Otu001496	0	2	3	0	3	0	0	0	0	0	0	0	0	0	0	0	0	2	k__Bacteria;p__Firmicutes;c__Clostridia;o__Clostridiales;f__Ruminococcaceae
Otu001497	0	0	0	0	1	3	0	1	0	0	0	0	3	0	2	0	0	0	k__Bacteria;p__Firmicutes;c__Clostridia;o__Clostridiales;f__Lachnospiraceae
Otu001498	0	2	0	0	0	0	0	0	2	0	3	3	0	0	0	0	0	0	k__Bacteria;p__Gemmatimonadetes;c__BD2-11_terrestrial_group;o__;f__;g__;s__
Otu001499	0	0	0	0	0	0	0	0	0	0	4	6	0	0	0	0	0	0	k__Bacteria;p__Bacteroidetes;c__Bacteroidia;o__Bacteroidales;f__Muribaculaceae;g__;s__
Otu001500	0	1	0	0	0	1	1	1	1	2	2	0	1	0	0	0	0	0	k__Bacteria;p__Actinobacteria;c__Actinobacteria;o__Propionibacteriales;f__Nocardioidaceae;g__Nocardioides
Otu001501	0	6	0	0	0	0	0	0	2	0	2	0	0	0	0	0	0	0	k__Bacteria;p__Deinococcus-Thermus;c__Deinococci;o__Deinococcales;f__Trueperaceae;g__Truepera;s__
Otu001502	0	0	0	0	1	0	0	0	1	2	6	0	0	0	0	0	0	0	k__Bacteria;p__Bacteroidetes;c__Bacteroidia;o__Flavobacteriales;f__Weeksellaceae;g__Cloacibacterium
Otu001503	0	0	0	0	0	0	0	0	2	4	3	0	0	0	1	0	0	0	k__Bacteria;p__Actinobacteria;c__Thermoleophilia;o__Gaiellales;f__Gaiellaceae;g__Gaiella;s__
Otu001504	1	0	4	0	0	0	0	0	0	1	1	0	0	0	0	1	1	1	k__Bacteria;p__Proteobacteria;c__Gammaproteobacteria;o__Pseudomonadales;f__Pseudomonadaceae;g__Pseudomonas;s__Pseudomonas_umsongensis
Otu001505	0	0	0	1	0	0	3	0	0	0	2	0	3	0	1	0	0	0	k__Bacteria;p__Bacteroidetes;c__Bacteroidia;o__Bacteroidales;f__Muribaculaceae;g__;s__
Otu001506	0	0	4	0	0	0	4	0	1	0	0	0	1	0	0	0	0	0	k__Bacteria;p__Firmicutes;c__Clostridia;o__Clostridiales;f__Clostridiaceae_1;g__Clostridium_sensu_stricto_1;s__
Otu001507	0	0	0	0	4	1	0	0	0	0	0	1	3	1	0	0	0	0	k__Bacteria;p__Firmicutes;c__Clostridia;o__Clostridiales;f__Lachnospiraceae
Otu001508	0	0	0	1	0	0	2	0	1	0	0	1	1	0	0	0	4	0	k__Bacteria;p__Bacteroidetes;c__Bacteroidia;o__Bacteroidales;f__Muribaculaceae;g__;s__
Otu001509	0	0	0	0	0	0	0	0	2	2	1	0	0	1	0	3	0	1	k__Bacteria;p__Acidobacteria;c__Subgroup_9;o__;f__;g__;s__
Otu001510	2	3	0	0	0	0	0	1	1	1	2	0	0	0	0	0	0	0	k__Bacteria;p__Acidobacteria;c__Holophagae;o__Subgroup_7;f__;g__;s__
Otu001511	0	1	0	0	1	0	1	0	2	3	0	2	0	0	0	0	0	0	k__Bacteria;p__Gemmatimonadetes;c__Gemmatimonadetes;o__Gemmatimonadales;f__Gemmatimonadaceae;g__;s__
Otu001512	1	0	0	0	0	1	0	0	2	3	0	0	0	1	2	0	0	0	k__Bacteria;p__Bacteroidetes;c__Bacteroidia;o__Flavobacteriales;f__Weeksellaceae;g__Chryseobacterium
Otu001513	2	1	0	2	0	1	2	0	0	0	0	0	1	0	0	1	0	0	k__Bacteria;p__Acidobacteria;c__Thermoanaerobaculia;o__Thermoanaerobaculales;f__Thermoanaerobaculaceae;g__Subgroup_10;s__
Otu001514	0	0	2	1	0	0	0	0	0	1	2	2	0	0	0	2	0	0	k__Bacteria;p__Proteobacteria;c__Deltaproteobacteria
Otu001515	0	2	0	0	0	0	0	1	2	3	0	0	2	0	0	0	0	0	k__Bacteria;p__Proteobacteria;c__Gammaproteobacteria
Otu001516	0	0	1	1	1	0	1	0	0	1	1	0	3	0	0	1	0	0	k__Bacteria;p__Bacteroidetes;c__Bacteroidia;o__Bacteroidales;f__Muribaculaceae;g__;s__
Otu001517	0	0	0	0	5	0	5	0	0	0	0	0	0	0	0	0	0	0	k__Bacteria;p__Firmicutes;c__Clostridia;o__Clostridiales;f__Ruminococcaceae
Otu001518	0	1	0	0	0	1	0	0	0	2	5	0	1	0	0	0	0	0	k__Bacteria;p__Proteobacteria;c__Alphaproteobacteria;o__Sphingomonadales;f__Sphingomonadaceae;g__Altererythrobacter;s__
Otu001519	0	0	1	0	1	0	0	1	1	0	4	0	2	0	0	0	0	0	k__Bacteria;p__Actinobacteria;c__Acidimicrobiia;o__Microtrichales;f__;g__;s__
Otu001520	0	2	0	0	0	0	0	0	0	3	5	0	0	0	0	0	0	0	k__Bacteria;p__Proteobacteria;c__Deltaproteobacteria
Otu001521	2	1	0	0	0	1	0	0	4	0	0	1	0	0	0	1	0	0	k__Bacteria;p__Proteobacteria;c__Deltaproteobacteria
Otu001522	4	0	0	0	0	0	0	0	0	0	0	0	0	3	0	1	0	2	k__Bacteria;p__Firmicutes;c__Clostridia;o__Clostridiales;f__Lachnospiraceae
Otu001523	0	0	0	0	0	0	0	0	9	0	0	0	1	0	0	0	0	0	k__Bacteria;p__Gemmatimonadetes;c__Gemmatimonadetes;o__Gemmatimonadales;f__Gemmatimonadaceae
Otu001524	1	1	1	0	1	0	0	0	1	0	1	4	0	0	0	0	0	0	k__Bacteria;p__Acidobacteria;c__Acidobacteriia;o__Solibacterales;f__Solibacteraceae_Subgroup_3;g__Bryobacter;s__
Otu001525	1	0	0	1	0	1	1	0	0	0	0	0	2	0	2	0	1	1	k__Bacteria;p__Bacteroidetes;c__Bacteroidia;o__Bacteroidales;f__Rikenellaceae;g__Alistipes
Otu001526	2	1	1	0	0	0	0	0	6	0	0	0	0	0	0	0	0	0	k__Bacteria;p__Proteobacteria;c__Gammaproteobacteria;o__Oceanospirillales;f__Pseudohongiellaceae;g__BIyi10;s__
Otu001527	0	2	0	0	0	0	1	0	2	0	1	0	4	0	0	0	0	0	k__Bacteria;p__Actinobacteria;c__Actinobacteria;o__Micrococcales;f__Micrococcaceae
Otu001528	0	3	1	2	0	0	0	0	1	1	1	0	0	0	0	0	0	1	k__Bacteria;p__Proteobacteria;c__Alphaproteobacteria;o__Rhizobiales;f__Xanthobacteraceae
Otu001529	0	0	0	0	0	2	0	0	2	0	0	0	0	0	2	0	2	2	k__Bacteria;p__Actinobacteria;c__Actinobacteria;o__Bifidobacteriales;f__Bifidobacteriaceae;g__Bifidobacterium;s__
Otu001530	0	0	1	0	0	2	1	0	0	3	0	0	0	0	3	0	0	0	k__Bacteria;p__Bacteroidetes;c__Bacteroidia;o__Bacteroidales;f__Tannerellaceae;g__Macellibacteroides
Otu001531	0	0	1	0	0	0	3	0	2	1	3	0	0	0	0	0	0	0	k__Bacteria;p__Acidobacteria;c__Subgroup_6
Otu001532	0	0	0	0	0	0	0	0	0	0	6	4	0	0	0	0	0	0	k__Bacteria;p__Bacteroidetes;c__Bacteroidia;o__Bacteroidales;f__Muribaculaceae;g__;s__
Otu001533	0	4	0	0	0	0	0	0	0	2	1	0	3	0	0	0	0	0	k__Bacteria;p__Planctomycetes;c__Planctomycetacia;o__Pirellulales;f__Pirellulaceae
Otu001534	1	1	8	0	0	0	0	0	0	0	0	0	0	0	0	0	0	0	k__Bacteria;p__Firmicutes;c__Clostridia;o__Clostridiales;f__Family_XIII
Otu001535	0	0	2	3	0	0	0	5	0	0	0	0	0	0	0	0	0	0	k__Bacteria;p__Bacteroidetes;c__Bacteroidia;o__Bacteroidales;f__Rikenellaceae;g__Alistipes
Otu001536	0	3	1	1	1	0	0	0	0	0	2	0	0	0	2	0	0	0	k__Bacteria;p__Bacteroidetes;c__Bacteroidia;o__Bacteroidales;f__Muribaculaceae
Otu001537	2	0	0	0	0	0	0	0	1	0	6	0	1	0	0	0	0	0	k__Bacteria;p__Proteobacteria;c__Gammaproteobacteria;o__Betaproteobacteriales;f__Nitrosomonadaceae;g__MND1;s__
Otu001538	0	0	0	0	0	0	0	0	4	1	4	1	0	0	0	0	0	0	k__Bacteria;p__Actinobacteria;c__Actinobacteria;o__Micrococcales;f__Intrasporangiaceae
Otu001539	0	0	1	1	0	0	0	0	6	0	1	0	1	0	0	0	0	0	k__Bacteria;p__Proteobacteria;c__Deltaproteobacteria;o__Myxococcales;f__Archangiaceae;g__Anaeromyxobacter
Otu001540	1	0	0	0	0	0	0	0	5	2	0	0	1	0	0	0	0	1	k__Bacteria;p__Chloroflexi;c__Anaerolineae;o__SBR1031;f__A4b;g__;s__
Otu001541	0	0	0	0	0	0	3	0	1	0	2	0	2	1	0	0	0	1	k__Bacteria;p__Entotheonellaeota;c__Entotheonellia;o__Entotheonellales;f__Entotheonellaceae;g__;s__
Otu001542	0	0	0	0	0	0	1	1	5	0	1	0	0	2	0	0	0	0	k__Bacteria;p__Gemmatimonadetes;c__BD2-11_terrestrial_group;o__;f__;g__;s__
Otu001543	1	0	0	0	0	0	0	0	1	0	2	0	2	2	0	0	0	2	k__Bacteria;p__Bacteroidetes;c__Bacteroidia;o__Flavobacteriales;f__Flavobacteriaceae;g__Flavobacterium
Otu001544	1	2	0	0	0	0	0	1	0	2	2	0	2	0	0	0	0	0	k__Bacteria;p__Bacteroidetes;c__Bacteroidia;o__Bacteroidales;f__Bacteroidetes_vadinHA17;g__;s__
Otu001545	1	0	1	0	0	0	0	1	1	0	3	0	0	2	0	0	0	1	k__Bacteria;p__Proteobacteria;c__Deltaproteobacteria;o__Myxococcales;f__BIrii41;g__;s__
Otu001546	0	1	0	0	2	0	1	0	1	1	3	0	1	0	0	0	0	0	k__Bacteria;p__Gemmatimonadetes;c__Gemmatimonadetes;o__Gemmatimonadales;f__Gemmatimonadaceae
Otu001547	0	0	0	0	1	0	0	0	2	0	3	0	3	0	0	0	0	1	k__Bacteria;p__Bacteroidetes;c__Bacteroidia;o__Chitinophagales;f__Chitinophagaceae
Otu001548	0	0	0	0	4	1	0	1	0	0	0	0	0	4	0	0	0	0	k__Bacteria;p__Firmicutes;c__Clostridia;o__Clostridiales;f__Ruminococcaceae;g__Ruminococcaceae_UCG-014;s__
Otu001549	0	0	1	1	1	0	1	1	0	0	0	1	0	0	2	1	1	0	k__Bacteria;p__Bacteroidetes;c__Bacteroidia;o__Bacteroidales;f__Marinifilaceae;g__Odoribacter
Otu001550	0	0	0	0	0	0	0	0	0	0	0	0	0	0	0	10	0	0	k__Bacteria;p__Tenericutes;c__Mollicutes;o__Mollicutes_RF39;f__;g__;s__
Otu001551	0	0	1	1	0	1	1	3	0	0	0	0	2	0	0	1	0	0	k__Bacteria;p__Firmicutes;c__Clostridia;o__Clostridiales;f__Ruminococcaceae
Otu001552	0	0	1	0	1	4	2	0	0	0	0	0	0	0	2	0	0	0	k__Bacteria;p__Firmicutes;c__Clostridia;o__Clostridiales;f__Ruminococcaceae;g__Ruminococcaceae_UCG-013
Otu001553	0	0	0	0	2	0	0	0	3	2	2	0	0	0	0	0	0	1	k__Bacteria;p__Acidobacteria;c__Acidobacteriia;o__Solibacterales;f__Solibacteraceae_Subgroup_3;g__Bryobacter;s__
Otu001554	0	1	0	0	1	0	1	0	1	3	1	1	0	0	0	0	0	1	k__Bacteria;p__Acidobacteria;c__Subgroup_6
Otu001555	0	2	2	0	1	0	0	1	0	0	1	0	0	2	0	0	0	1	k__Bacteria;p__Firmicutes;c__Clostridia;o__Clostridiales;f__Lachnospiraceae
Otu001556	0	0	0	0	0	2	0	0	1	1	2	0	0	2	0	0	2	0	k__Bacteria;p__Planctomycetes;c__Pla3_lineage;o__;f__;g__;s__
Otu001557	0	1	0	0	1	1	0	0	1	1	1	1	0	2	0	1	0	0	k__Bacteria;p__Bacteroidetes;c__Bacteroidia;o__Bacteroidales;f__Muribaculaceae
Otu001558	4	0	0	0	0	0	0	2	1	0	2	1	0	0	0	0	0	0	k__Bacteria;p__Chloroflexi;c__Anaerolineae;o__Anaerolineales;f__Anaerolineaceae;g__;s__
Otu001559	0	0	0	0	0	0	0	0	0	0	0	0	0	7	0	3	0	0	k__Bacteria;p__Firmicutes;c__Clostridia;o__Clostridiales;f__Lachnospiraceae;g__Lachnospiraceae_NK4A136_group;s__
Otu001560	0	0	1	1	0	0	1	0	1	0	0	1	1	1	1	1	1	0	k__Bacteria;p__Bacteroidetes;c__Bacteroidia;o__Bacteroidales;f__Muribaculaceae;g__;s__
Otu001561	1	0	1	0	0	0	2	0	0	3	1	0	1	0	0	0	0	1	k__Bacteria;p__Proteobacteria;c__Alphaproteobacteria;o__Caulobacterales;f__Caulobacteraceae
Otu001562	0	0	0	0	0	0	0	0	0	0	5	0	0	1	0	1	0	3	k__Bacteria
Otu001563	0	0	0	0	0	2	0	1	0	2	2	0	0	1	0	0	0	1	k__Bacteria;p__Proteobacteria;c__Gammaproteobacteria;o__Betaproteobacteriales
Otu001564	0	2	0	0	0	1	1	0	2	0	2	0	1	0	0	0	0	0	k__Bacteria;p__Actinobacteria;c__Acidimicrobiia;o__Actinomarinales;f__;g__;s__
Otu001565	0	1	0	0	1	1	0	0	6	0	0	0	0	0	0	0	0	0	k__Bacteria;p__Bacteroidetes;c__Bacteroidia;o__Flavobacteriales;f__NS9_marine_group;g__;s__
Otu001566	0	1	0	0	0	0	1	0	3	2	2	0	0	0	0	0	0	0	k__Archaea;p__Thaumarchaeota;c__Nitrososphaeria;o__Nitrosotaleales;f__Nitrosotaleaceae;g__Candidatus_Nitrosotalea;s__
Otu001567	0	1	0	0	0	2	1	0	4	0	1	0	0	0	0	0	0	0	k__Bacteria;p__Bacteroidetes;c__Bacteroidia;o__Bacteroidales;f__Dysgonomonadaceae;g__Proteiniphilum
Otu001568	0	2	0	0	0	2	1	0	0	0	0	0	0	0	0	0	1	3	k__Bacteria;p__Bacteroidetes;c__Bacteroidia;o__Bacteroidales;f__Muribaculaceae
Otu001569	0	1	0	0	0	2	1	0	2	2	1	0	0	0	0	0	0	0	k__Bacteria;p__Actinobacteria;c__Acidimicrobiia;o__;f__;g__;s__
Otu001570	0	1	0	0	1	0	0	0	5	0	0	0	2	0	0	0	0	0	k__Bacteria;p__Proteobacteria;c__Deltaproteobacteria;o__Desulfarculales;f__Desulfarculaceae;g__;s__
Otu001571	0	0	0	0	0	1	0	0	5	0	2	0	1	0	0	0	0	0	k__Bacteria;p__Planctomycetes;c__Planctomycetacia;o__Planctomycetales;f__Rubinisphaeraceae;g__SH-PL14;s__
Otu001572	0	0	0	0	0	0	0	1	1	0	5	2	0	0	0	0	0	0	k__Bacteria;p__Acidobacteria;c__Thermoanaerobaculia;o__Thermoanaerobaculales;f__Thermoanaerobaculaceae;g__Subgroup_10
Otu001573	0	2	0	1	0	0	0	0	2	1	2	1	0	0	0	0	0	0	k__Bacteria;p__Proteobacteria;c__Gammaproteobacteria;o__Steroidobacterales;f__Woeseiaceae;g__JTB255_marine_benthic_group;s__
Otu001574	0	0	0	0	0	0	0	1	3	1	3	0	1	0	0	0	0	0	k__Bacteria;p__Planctomycetes;c__OM190;o__;f__;g__;s__
Otu001575	0	0	0	0	0	0	0	0	0	0	0	4	0	0	0	0	5	0	k__Bacteria;p__Tenericutes;c__Mollicutes;o__Mollicutes_RF39;f__;g__;s__
Otu001576	0	0	0	0	0	2	1	0	3	0	0	0	0	3	0	0	0	0	k__Bacteria;p__Firmicutes;c__Erysipelotrichia;o__Erysipelotrichales;f__Erysipelotrichaceae;g__Ileibacterium;s__Ileibacterium_valens
Otu001577	0	2	0	0	0	0	0	2	0	0	0	2	2	1	0	0	0	0	k__Bacteria;p__Firmicutes;c__Clostridia;o__Clostridiales;f__Lachnospiraceae
Otu001578	0	0	0	0	0	0	0	0	0	0	1	8	0	0	0	0	0	0	k__Bacteria;p__Bacteroidetes;c__Bacteroidia;o__Bacteroidales;f__Muribaculaceae;g__;s__
Otu001579	0	0	2	1	0	0	0	2	2	0	1	0	1	0	0	0	0	0	k__Bacteria;p__Firmicutes;c__Erysipelotrichia;o__Erysipelotrichales;f__Erysipelotrichaceae;g__Anaerorhabdus_furcosa_group
Otu001580	0	0	0	2	2	1	0	0	0	0	0	0	0	0	1	2	0	1	k__Bacteria;p__Firmicutes;c__Clostridia;o__Clostridiales;f__Ruminococcaceae;g__Eubacterium_coprostanoligenes_group
Otu001581	0	2	0	0	0	1	2	0	1	0	1	0	0	2	0	0	0	0	k__Bacteria;p__Bacteroidetes;c__Ignavibacteria;o__Ignavibacteriales;f__PHOS-HE36;g__;s__
Otu001582	1	0	0	0	0	0	0	2	1	0	0	0	4	0	0	1	0	0	k__Bacteria;p__Proteobacteria;c__Deltaproteobacteria;o__Desulfuromonadales;f__Desulfuromonadaceae
Otu001583	0	2	0	0	0	0	0	0	0	1	0	0	2	1	1	1	1	0	k__Bacteria;p__Bacteroidetes;c__Bacteroidia;o__Bacteroidales;f__Muribaculaceae
Otu001584	0	0	0	0	1	0	0	0	3	0	4	1	0	0	0	0	0	0	k__Bacteria;p__Planctomycetes;c__Planctomycetacia;o__Pirellulales;f__Pirellulaceae;g__Pir4_lineage
Otu001585	0	0	2	0	1	0	1	0	0	0	0	1	2	0	1	0	1	0	k__Bacteria;p__Bacteroidetes;c__Bacteroidia;o__Bacteroidales;f__Marinilabiliaceae
Otu001586	1	0	0	0	0	0	1	2	1	1	1	0	0	0	1	0	0	1	k__Bacteria;p__Bacteroidetes;c__Bacteroidia;o__Bacteroidales;f__Marinifilaceae;g__Odoribacter
Otu001587	0	0	0	0	1	0	0	0	0	0	3	0	0	3	0	1	0	1	k__Bacteria;p__Proteobacteria;c__Alphaproteobacteria;o__Reyranellales;f__Reyranellaceae;g__;s__
Otu001588	2	0	0	0	1	0	2	1	0	0	0	0	0	1	0	0	0	2	k__Bacteria;p__Firmicutes;c__Clostridia;o__Clostridiales;f__Ruminococcaceae;g__Ruminococcaceae_UCG-002;s__
Otu001589	0	0	3	2	1	0	0	0	0	1	0	0	1	0	1	0	0	0	k__Bacteria;p__Firmicutes;c__Clostridia;o__Clostridiales
Otu001590	1	1	0	0	0	0	0	2	4	0	0	0	1	0	0	0	0	0	k__Bacteria;p__Chloroflexi;c__Anaerolineae;o__Anaerolineales;f__Anaerolineaceae
Otu001591	0	4	0	0	0	2	0	0	1	1	0	0	1	0	0	0	0	0	k__Bacteria;p__Acidobacteria;c__Subgroup_6;o__Unknown_Order;f__Unknown_Family;g__Luteitalea;s__
Otu001592	1	0	0	0	0	0	1	2	2	2	1	0	0	0	0	0	0	0	k__Bacteria;p__Proteobacteria;c__Alphaproteobacteria;o__Rhodobacterales;f__Rhodobacteraceae;g__Tabrizicola;s__
Otu001593	1	0	0	0	0	0	0	0	2	1	3	1	1	0	0	0	0	0	k__Bacteria;p__Acidobacteria;c__Subgroup_6
Otu001594	0	0	0	0	0	0	0	2	1	1	2	0	0	2	0	0	0	1	k__Bacteria;p__Bacteroidetes;c__Bacteroidia;o__Chitinophagales;f__Chitinophagaceae
Otu001595	0	1	1	0	1	0	0	0	0	3	2	0	0	0	0	0	1	0	k__Bacteria;p__Proteobacteria;c__Alphaproteobacteria;o__Rhizobiales;f__Hyphomicrobiaceae;g__Hyphomicrobium
Otu001596	1	2	0	0	3	1	0	0	0	0	1	0	0	1	0	0	0	0	k__Bacteria;p__Firmicutes;c__Clostridia;o__Clostridiales;f__Lachnospiraceae
Otu001597	1	1	0	0	0	1	0	0	5	0	0	0	0	1	0	0	0	0	k__Bacteria;p__Actinobacteria;c__MB-A2-108;o__;f__;g__;s__
Otu001598	1	0	0	0	0	0	0	0	0	1	3	0	0	3	0	1	0	0	k__Bacteria;p__Rokubacteria;c__NC10;o__Rokubacteriales;f__;g__;s__
Otu001599	0	3	0	0	0	0	0	0	3	0	0	1	0	0	0	2	0	0	k__Bacteria;p__Proteobacteria;c__Deltaproteobacteria;o__Myxococcales;f__Nannocystaceae;g__Nannocystis;s__
Otu001600	0	2	0	0	0	0	2	0	1	0	2	1	0	1	0	0	0	0	k__Bacteria;p__Acidobacteria;c__Subgroup_6
Otu001601	0	0	0	0	0	0	2	0	1	0	4	0	0	0	0	0	2	0	k__Bacteria;p__Proteobacteria;c__Gammaproteobacteria;o__Xanthomonadales;f__Xanthomonadaceae;g__Stenotrophomonas
Otu001602	0	3	0	0	0	0	0	0	0	1	3	1	0	0	0	0	1	0	k__Bacteria;p__Proteobacteria;c__Gammaproteobacteria;o__Xanthomonadales;f__Rhodanobacteraceae;g__;s__
Otu001603	0	1	0	0	0	2	0	1	3	0	2	0	0	0	0	0	0	0	k__Bacteria;p__Proteobacteria;c__Deltaproteobacteria;o__Desulfuromonadales;f__Geobacteraceae;g__Geobacter;s__Geobacter_soli
Otu001604	0	0	2	0	0	0	1	0	1	1	1	0	2	0	1	0	0	0	k__Bacteria;p__Bacteroidetes;c__Bacteroidia;o__Bacteroidales;f__Muribaculaceae;g__;s__
Otu001605	0	3	0	0	3	0	0	0	0	0	0	0	0	0	0	0	3	0	k__Bacteria;p__Firmicutes;c__Clostridia;o__Clostridiales;f__Ruminococcaceae;g__Ruminococcaceae_UCG-010;s__
Otu001606	0	0	2	0	0	0	0	0	6	0	0	0	1	0	0	0	0	0	k__Bacteria;p__Firmicutes;c__Clostridia;o__Clostridiales;f__Clostridiaceae_1
Otu001607	0	1	0	0	0	1	0	1	4	1	1	0	0	0	0	0	0	0	k__Bacteria;p__Gemmatimonadetes;c__Gemmatimonadetes;o__Gemmatimonadales;f__Gemmatimonadaceae;g__;s__
Otu001608	1	0	0	0	1	0	0	0	0	0	1	1	0	3	1	1	0	0	k__Bacteria;p__Bacteroidetes;c__Bacteroidia;o__Bacteroidales;f__Muribaculaceae;g__;s__
Otu001609	0	1	0	1	1	0	0	0	0	0	0	0	0	1	3	1	1	0	k__Bacteria;p__Bacteroidetes;c__Bacteroidia;o__Bacteroidales;f__Muribaculaceae;g__;s__
Otu001610	1	1	0	0	0	0	0	0	1	2	0	0	4	0	0	0	0	0	k__Bacteria;p__Actinobacteria;c__Acidimicrobiia;o__Microtrichales;f__Microtrichaceae;g__IMCC26207;s__
Otu001611	1	0	0	0	1	2	0	0	0	2	0	0	1	0	0	0	0	2	k__Bacteria;p__Firmicutes;c__Clostridia;o__Clostridiales
Otu001612	1	0	0	0	0	0	2	0	0	2	1	0	0	0	0	0	0	3	k__Bacteria;p__Bacteroidetes;c__Bacteroidia;o__Bacteroidales;f__Muribaculaceae;g__;s__
Otu001613	0	0	0	0	1	1	0	0	2	0	3	1	0	1	0	0	0	0	k__Bacteria;p__Actinobacteria;c__Actinobacteria;o__Frankiales;f__Geodermatophilaceae
Otu001614	0	0	0	0	0	1	0	0	1	1	2	0	1	0	3	0	0	0	k__Bacteria;p__Firmicutes;c__Clostridia;o__Clostridiales;f__Lachnospiraceae;g__Tyzzerella_3;s__
Otu001615	0	0	0	0	0	0	0	1	0	0	3	0	2	3	0	0	0	0	k__Bacteria;p__Proteobacteria;c__Alphaproteobacteria;o__Rhizobiales;f__Xanthobacteraceae;g__;s__
Otu001616	0	0	2	0	2	2	0	0	1	1	0	1	0	0	0	0	0	0	k__Bacteria;p__Planctomycetes;c__Planctomycetacia;o__Planctomycetales;f__;g__;s__
Otu001617	0	0	0	0	0	0	0	0	0	1	5	0	0	1	0	0	0	2	k__Bacteria;p__Chloroflexi;c__KD4-96;o__;f__;g__;s__
Otu001618	1	1	0	0	0	2	0	0	2	2	0	0	0	0	0	0	0	1	k__Bacteria;p__Actinobacteria;c__Actinobacteria;o__Micrococcales;f__Intrasporangiaceae
Otu001619	3	0	2	3	0	0	0	1	0	0	0	0	0	0	0	0	0	0	k__Bacteria;p__Firmicutes;c__Clostridia;o__Clostridiales;f__Ruminococcaceae
Otu001620	0	0	0	0	2	0	0	0	3	2	1	0	0	0	0	0	0	1	k__Bacteria;p__Acidobacteria;c__Blastocatellia_Subgroup_4;o__11-24;f__;g__;s__
Otu001621	0	0	0	0	0	0	0	0	5	0	3	1	0	0	0	0	0	0	k__Bacteria;p__Chloroflexi;c__Anaerolineae;o__Anaerolineales;f__Anaerolineaceae;g__UTCFX1;s__
Otu001622	0	0	0	0	0	0	0	0	4	2	0	1	2	0	0	0	0	0	k__Bacteria;p__Chloroflexi;c__Anaerolineae;o__SBR1031
Otu001623	0	0	0	0	0	0	0	0	0	0	0	0	0	0	0	8	0	1	k__Bacteria;p__Bacteroidetes;c__Bacteroidia;o__Bacteroidales;f__Muribaculaceae
Otu001624	2	0	0	1	0	2	0	1	2	0	0	0	1	0	0	0	0	0	k__Bacteria;p__Planctomycetes;c__Planctomycetacia;o__Pirellulales;f__Pirellulaceae;g__;s__
Otu001625	0	0	1	0	0	0	0	1	2	4	0	0	0	0	0	0	0	1	k__Bacteria;p__Proteobacteria;c__Gammaproteobacteria;o__Betaproteobacteriales;f__Burkholderiaceae
Otu001626	1	0	3	1	0	0	0	0	0	1	3	0	0	0	0	0	0	0	k__Bacteria;p__Firmicutes;c__Bacilli;o__Lactobacillales;f__Lactobacillaceae;g__Lactobacillus
Otu001627	0	0	0	0	1	0	1	0	3	4	0	0	0	0	0	0	0	0	k__Bacteria;p__Proteobacteria;c__Alphaproteobacteria;o__Rhizobiales;f__Rhizobiaceae;g__Shinella;s__
Otu001628	2	2	0	1	0	0	1	0	0	0	0	0	1	0	0	0	2	0	k__Bacteria;p__Bacteroidetes;c__Bacteroidia;o__Bacteroidales;f__Muribaculaceae;g__;s__
Otu001629	0	1	2	1	1	1	1	0	0	0	1	0	1	0	0	0	0	0	k__Bacteria;p__Firmicutes;c__Bacilli;o__Lactobacillales;f__Lactobacillaceae;g__Lactobacillus
Otu001630	0	1	0	1	0	0	0	1	1	1	3	1	0	0	0	0	0	0	k__Bacteria;p__Proteobacteria;c__Gammaproteobacteria;o__Betaproteobacteriales;f__SC-I-84;g__;s__
Otu001631	0	0	1	0	0	0	0	0	1	0	5	0	0	0	0	0	1	1	k__Bacteria;p__Firmicutes;c__Bacilli;o__Bacillales;f__Staphylococcaceae;g__Staphylococcus
Otu001632	0	0	0	0	0	0	2	0	0	0	2	1	0	2	1	0	0	1	k__Bacteria;p__Chloroflexi;c__P2-11E;o__;f__;g__;s__
Otu001633	0	0	1	2	0	1	0	0	2	0	0	1	2	0	0	0	0	0	k__Bacteria;p__Proteobacteria;c__Gammaproteobacteria;o__211ds20;f__;g__;s__
Otu001634	3	0	0	0	2	4	0	0	0	0	0	0	0	0	0	0	0	0	k__Bacteria;p__Firmicutes;c__Clostridia;o__Clostridiales;f__Lachnospiraceae;g__Eubacterium_xylanophilum_group;s__
Otu001635	0	0	1	1	0	0	0	0	1	0	1	1	4	0	0	0	0	0	k__Archaea;p__Thaumarchaeota;c__Nitrososphaeria;o__Nitrososphaerales;f__Nitrososphaeraceae;g__;s__
Otu001636	0	0	0	0	0	0	0	0	6	0	1	2	0	0	0	0	0	0	k__Bacteria;p__Proteobacteria;c__Alphaproteobacteria;o__Rhodovibrionales;f__Kiloniellaceae;g__Pelagibius
Otu001637	0	0	0	0	0	0	3	0	3	0	2	0	1	0	0	0	0	0	k__Bacteria;p__Proteobacteria;c__Gammaproteobacteria;o__Betaproteobacteriales
Otu001638	1	1	0	0	0	2	0	0	3	0	1	1	0	0	0	0	0	0	k__Bacteria;p__Actinobacteria;c__Thermoleophilia;o__Solirubrobacterales;f__Solirubrobacteraceae;g__Solirubrobacter;s__
Otu001639	1	0	0	0	2	1	0	0	0	0	0	0	0	1	1	0	0	3	k__Bacteria;p__Firmicutes;c__Clostridia;o__Clostridiales;f__Ruminococcaceae
Otu001640	0	1	0	0	0	0	0	0	1	0	4	0	1	0	1	0	0	1	k__Bacteria;p__Actinobacteria;c__Acidimicrobiia;o__Microtrichales;f__Ilumatobacteraceae
Otu001641	0	2	1	1	0	1	1	0	0	0	0	0	1	0	0	0	0	2	k__Bacteria;p__Bacteroidetes;c__Bacteroidia;o__Bacteroidales;f__Muribaculaceae;g__;s__
Otu001642	0	2	1	0	0	0	1	0	2	0	2	0	1	0	0	0	0	0	k__Bacteria;p__Proteobacteria;c__Deltaproteobacteria;o__Myxococcales
Otu001643	0	0	0	0	0	0	1	0	2	0	0	0	0	1	1	0	0	4	k__Bacteria;p__Firmicutes;c__Erysipelotrichia;o__Erysipelotrichales;f__Erysipelotrichaceae;g__Ileibacterium;s__Ileibacterium_valens
Otu001644	0	0	0	0	0	1	0	0	1	0	5	0	0	1	0	1	0	0	k__Bacteria
Otu001645	0	0	0	0	0	0	3	3	0	0	0	0	1	0	0	2	0	0	k__Bacteria;p__Firmicutes;c__Clostridia;o__Clostridiales;f__Lachnospiraceae;g__;s__
Otu001646	2	0	0	0	0	0	4	0	1	0	1	0	1	0	0	0	0	0	k__Bacteria;p__Deinococcus-Thermus;c__Deinococci;o__Deinococcales;f__Trueperaceae;g__Truepera;s__
Otu001647	0	0	0	2	0	1	1	0	1	0	1	0	1	1	0	1	0	0	k__Bacteria;p__Proteobacteria;c__Alphaproteobacteria;o__Dongiales;f__Dongiaceae;g__Dongia;s__
Otu001648	0	0	0	0	0	0	0	0	5	1	1	1	0	0	0	0	0	0	k__Bacteria;p__Chloroflexi;c__Anaerolineae;o__SBR1031
Otu001649	0	1	0	0	0	0	2	0	1	2	1	0	1	0	0	0	0	0	k__Bacteria;p__Chloroflexi;c__Chloroflexia;o__Thermomicrobiales;f__JG30-KF-CM45;g__;s__
Otu001650	0	0	0	0	0	0	0	0	4	0	4	0	0	0	0	0	0	0	k__Bacteria;p__Chloroflexi;c__Anaerolineae;o__SBR1031;f__A4b;g__;s__
Otu001651	2	0	0	0	1	0	0	0	2	0	0	0	1	1	1	0	0	0	k__Bacteria;p__Bacteroidetes;c__Bacteroidia;o__Bacteroidales;f__Muribaculaceae
Otu001652	0	0	0	0	0	0	0	0	0	0	1	0	0	3	0	1	0	3	k__Bacteria;p__Proteobacteria;c__Gammaproteobacteria;o__Betaproteobacteriales;f__Nitrosomonadaceae;g__mle1-7;s__
Otu001653	1	0	0	0	1	1	0	0	3	0	1	1	0	0	0	0	0	0	k__Bacteria;p__Actinobacteria;c__Acidimicrobiia;o__Microtrichales;f__Iamiaceae;g__Iamia;s__
Otu001654	0	0	0	0	0	0	1	1	0	1	5	0	0	0	0	0	0	0	k__Bacteria;p__Chloroflexi;c__Anaerolineae;o__Anaerolineales;f__Anaerolineaceae;g__Anaerolinea;s__
Otu001655	2	3	0	0	0	0	0	0	0	0	0	0	0	0	1	0	2	0	k__Bacteria;p__Firmicutes;c__Clostridia;o__Clostridiales;f__Ruminococcaceae
Otu001656	0	1	4	0	0	0	0	0	1	1	0	0	1	0	0	0	0	0	k__Bacteria;p__Planctomycetes;c__Planctomycetacia;o__Pirellulales;f__Pirellulaceae;g__Pir4_lineage;s__Planctomycetaceae_bacterium_LX124
Otu001657	0	2	0	2	0	0	0	0	2	2	0	0	0	0	0	0	0	0	k__Bacteria;p__Proteobacteria;c__Deltaproteobacteria;o__Desulfuromonadales
Otu001658	0	0	0	0	0	0	0	0	0	2	2	0	1	0	0	0	3	0	k__Bacteria;p__Proteobacteria;c__Deltaproteobacteria;o__NB1-j;f__;g__;s__
Otu001659	0	0	0	1	0	1	0	0	1	0	1	0	1	0	1	0	0	2	k__Bacteria;p__Bacteroidetes;c__Bacteroidia;o__Bacteroidales;f__Muribaculaceae
Otu001660	3	1	0	2	2	0	0	0	0	0	0	0	0	0	0	0	0	0	k__Bacteria;p__Bacteroidetes;c__Bacteroidia;o__Bacteroidales
Otu001661	0	0	0	0	0	0	0	0	1	4	3	0	0	0	0	0	0	0	k__Bacteria;p__Proteobacteria;c__Deltaproteobacteria;o__Myxococcales;f__Phaselicystidaceae;g__Phaselicystis;s__
Otu001662	2	1	0	0	0	0	0	0	2	0	2	0	1	0	0	0	0	0	k__Bacteria;p__Proteobacteria;c__Gammaproteobacteria;o__Xanthomonadales;f__Rhodanobacteraceae
Otu001663	0	0	0	0	0	1	2	0	2	1	1	0	1	0	0	0	0	0	k__Bacteria;p__Proteobacteria;c__Gammaproteobacteria;o__Betaproteobacteriales;f__Nitrosomonadaceae;g__Ellin6067;s__
Otu001664	1	0	0	0	0	4	0	0	2	1	0	0	0	0	0	0	0	0	k__Bacteria;p__Proteobacteria;c__Gammaproteobacteria;o__Betaproteobacteriales;f__Nitrosomonadaceae;g__MND1;s__
Otu001665	3	1	0	0	0	0	2	0	0	0	0	0	2	0	0	0	0	0	k__Bacteria;p__Gemmatimonadetes;c__Gemmatimonadetes;o__Gemmatimonadales;f__Gemmatimonadaceae;g__;s__
Otu001666	0	1	1	0	0	0	0	0	0	0	0	0	4	0	1	0	0	1	k__Bacteria;p__Firmicutes;c__Clostridia;o__Clostridiales;f__Ruminococcaceae
Otu001667	0	0	0	0	0	0	1	0	0	1	3	0	0	0	0	0	0	3	k__Bacteria;p__Rokubacteria;c__NC10;o__Rokubacteriales;f__;g__;s__
Otu001668	0	0	0	0	0	0	0	0	5	0	0	0	3	0	0	0	0	0	k__Bacteria;p__Proteobacteria;c__Gammaproteobacteria;o__PLTA13;f__;g__;s__
Otu001669	0	0	0	0	0	0	0	0	1	0	4	1	1	0	0	0	1	0	k__Bacteria;p__Armatimonadetes;c__Fimbriimonadia;o__Fimbriimonadales;f__;g__;s__
Otu001670	0	1	2	0	0	1	0	0	2	1	0	0	1	0	0	0	0	0	k__Bacteria;p__Chloroflexi;c__Anaerolineae;o__SBR1031
Otu001671	0	0	0	1	0	0	0	0	4	0	1	1	1	0	0	0	0	0	k__Bacteria;p__Actinobacteria;c__Actinobacteria
Otu001672	0	0	0	0	0	2	0	0	2	1	0	1	2	0	0	0	0	0	k__Bacteria;p__Bacteroidetes;c__Ignavibacteria
Otu001673	0	0	0	0	0	0	0	1	3	0	0	2	2	0	0	0	0	0	k__Bacteria;p__Planctomycetes;c__Planctomycetacia;o__Isosphaerales;f__Isosphaeraceae;g__Paludisphaera;s__Paludisphaera_borealis
Otu001674	0	0	1	0	0	0	0	2	0	2	0	0	0	1	0	0	2	0	k__Bacteria;p__Firmicutes;c__Clostridia;o__Clostridiales;f__Clostridiales_vadinBB60_group;g__;s__
Otu001675	0	2	0	0	0	0	0	0	4	0	0	0	2	0	0	0	0	0	k__Bacteria;p__Firmicutes;c__Clostridia;o__Clostridiales;f__Peptococcaceae
Otu001676	0	5	0	0	0	0	0	0	2	0	0	0	1	0	0	0	0	0	k__Bacteria;p__Proteobacteria;c__Deltaproteobacteria;o__Desulfuromonadales;f__Geobacteraceae;g__Geoalkalibacter;s__
Otu001677	0	1	0	0	0	2	0	1	3	0	0	0	1	0	0	0	0	0	k__Bacteria;p__Bacteroidetes;c__Bacteroidia;o__Bacteroidales;f__Muribaculaceae;g__;s__
Otu001678	0	1	0	0	0	1	0	0	5	0	1	0	0	0	0	0	0	0	k__Bacteria;p__Proteobacteria;c__Alphaproteobacteria;o__Rhizobiales;f__;g__;s__
Otu001679	0	0	0	0	0	1	1	1	2	0	2	1	0	0	0	0	0	0	k__Bacteria;p__Chloroflexi;c__Anaerolineae;o__SBR1031;f__A4b;g__;s__
Otu001680	0	0	0	0	0	0	0	1	1	1	3	0	0	0	0	2	0	0	k__Bacteria;p__Verrucomicrobia;c__Verrucomicrobiae;o__Opitutales;f__Opitutaceae;g__Lacunisphaera;s__
Otu001681	0	0	0	0	1	0	0	0	0	0	3	1	0	1	0	0	0	2	k__Bacteria;p__Acidobacteria;c__Blastocatellia_Subgroup_4;o__Pyrinomonadales;f__Pyrinomonadaceae;g__RB41;s__
Otu001682	0	1	0	0	0	0	0	0	1	2	3	0	0	0	0	1	0	0	k__Bacteria;p__Proteobacteria;c__Gammaproteobacteria;o__Betaproteobacteriales;f__SC-I-84;g__;s__
Otu001683	0	0	0	0	1	1	0	1	1	0	2	0	1	0	1	0	0	0	k__Bacteria;p__Proteobacteria;c__Gammaproteobacteria;o__Betaproteobacteriales;f__Burkholderiaceae
Otu001684	0	1	0	1	0	0	0	2	0	2	2	0	0	0	0	0	0	0	k__Bacteria;p__Chloroflexi;c__Chloroflexia;o__Chloroflexales;f__Roseiflexaceae;g__;s__
Otu001685	0	0	0	1	0	2	1	0	1	1	1	1	0	0	0	0	0	0	k__Bacteria;p__Chloroflexi;c__Anaerolineae;o__SBR1031;f__A4b;g__;s__
Otu001686	2	3	0	0	0	0	0	0	0	0	0	0	0	0	0	3	0	0	k__Bacteria;p__Firmicutes;c__Clostridia;o__Clostridiales;f__Clostridiales_vadinBB60_group;g__;s__
Otu001687	0	1	2	0	0	0	0	0	0	0	1	2	1	1	0	0	0	0	k__Bacteria;p__Proteobacteria;c__Deltaproteobacteria
Otu001688	0	0	1	0	0	0	0	0	0	3	1	0	1	0	0	2	0	0	k__Bacteria;p__Proteobacteria;c__Deltaproteobacteria;o__PB19;f__;g__;s__
Otu001689	0	0	0	0	0	0	1	0	3	0	2	0	2	0	0	0	0	0	k__Bacteria;p__Synergistetes;c__Synergistia;o__Synergistales;f__Synergistaceae;g__Syner-01;s__
Otu001690	4	0	0	0	0	0	0	0	4	0	0	0	0	0	0	0	0	0	k__Bacteria;p__Chloroflexi;c__JG30-KF-CM66;o__;f__;g__;s__
Otu001691	0	1	0	0	0	0	0	0	1	3	0	0	0	3	0	0	0	0	k__Bacteria;p__Proteobacteria;c__Alphaproteobacteria;o__Rhodobacterales;f__Rhodobacteraceae;g__Amaricoccus;s__
Otu001692	3	1	0	0	0	0	0	0	0	0	0	1	0	1	0	0	1	1	k__Bacteria;p__Bacteroidetes;c__Bacteroidia;o__Bacteroidales;f__Muribaculaceae
Otu001693	2	1	0	0	0	0	1	0	0	1	0	0	0	2	0	0	1	0	k__Bacteria;p__Bacteroidetes;c__Bacteroidia;o__Bacteroidales;f__Muribaculaceae;g__;s__
Otu001694	2	0	0	0	0	0	0	0	1	0	0	0	0	2	0	0	1	2	k__Bacteria;p__Proteobacteria;c__Alphaproteobacteria;o__Caulobacterales;f__Caulobacteraceae;g__Caulobacter;s__
Otu001695	0	0	0	0	0	0	2	0	0	5	0	0	0	0	0	1	0	0	k__Bacteria;p__Firmicutes;c__Clostridia;o__Clostridiales;f__Ruminococcaceae;g__Eubacterium_coprostanoligenes_group
Otu001696	0	0	0	0	0	2	0	0	1	1	3	0	0	1	0	0	0	0	k__Bacteria;p__Planctomycetes;c__Phycisphaerae;o__Tepidisphaerales;f__WD2101_soil_group;g__;s__
Otu001697	0	1	0	0	0	0	1	0	2	1	3	0	0	0	0	0	0	0	k__Bacteria;p__Planctomycetes;c__Planctomycetacia;o__Planctomycetales;f__Rubinisphaeraceae;g__SH-PL14;s__
Otu001698	0	0	1	0	1	0	0	0	1	0	2	0	0	1	0	0	0	2	k__Bacteria;p__Proteobacteria;c__Deltaproteobacteria;o__NB1-j;f__;g__;s__
Otu001699	0	0	1	0	0	0	0	0	3	0	2	1	1	0	0	0	0	0	k__Bacteria;p__Gemmatimonadetes;c__Gemmatimonadetes;o__Gemmatimonadales;f__Gemmatimonadaceae;g__;s__
Otu001700	0	0	0	0	1	0	0	1	1	0	3	2	0	0	0	0	0	0	k__Bacteria;p__Acidobacteria;c__Subgroup_6;o__;f__;g__;s__
Otu001701	0	3	0	0	0	0	0	0	3	0	1	0	1	0	0	0	0	0	k__Bacteria;p__Planctomycetes;c__Planctomycetacia;o__Planctomycetales;f__Rubinisphaeraceae;g__Planctomicrobium;s__
Otu001702	0	0	0	1	2	1	0	0	0	2	0	0	0	1	0	0	1	0	k__Bacteria;p__Firmicutes;c__Bacilli;o__Lactobacillales;f__Lactobacillaceae;g__Lactobacillus
Otu001703	0	0	0	0	0	0	0	0	0	4	0	4	0	0	0	0	0	0	k__Bacteria;p__Gemmatimonadetes;c__S0134_terrestrial_group;o__;f__;g__;s__
Otu001704	1	2	0	0	0	0	0	0	4	0	0	0	1	0	0	0	0	0	k__Bacteria;p__Proteobacteria;c__Gammaproteobacteria;o__Betaproteobacteriales;f__Burkholderiaceae
Otu001705	2	0	0	1	1	0	0	0	0	2	0	0	0	1	0	1	0	0	k__Bacteria;p__Bacteroidetes;c__Bacteroidia;o__Bacteroidales;f__Muribaculaceae
Otu001706	0	1	0	0	0	0	0	0	1	0	3	0	0	2	0	1	0	0	k__Bacteria;p__Proteobacteria;c__Alphaproteobacteria;o__Rhizobiales;f__Beijerinckiaceae;g__Microvirga
Otu001707	1	0	0	0	0	0	0	0	2	4	1	0	0	0	0	0	0	0	k__Bacteria;p__Actinobacteria;c__Actinobacteria;o__Frankiales;f__;g__;s__
Otu001708	1	0	0	0	0	0	0	2	0	0	0	0	0	1	1	3	0	0	k__Bacteria;p__Bacteroidetes;c__Bacteroidia;o__Bacteroidales;f__Muribaculaceae
Otu001709	0	0	0	0	0	0	0	0	0	0	7	1	0	0	0	0	0	0	k__Bacteria
Otu001710	1	2	0	0	0	2	0	0	1	1	0	0	1	0	0	0	0	0	k__Bacteria;p__Proteobacteria;c__Alphaproteobacteria;o__Sphingomonadales;f__Sphingomonadaceae;g__Altererythrobacter;s__
Otu001711	0	0	0	0	1	0	0	0	0	1	1	0	0	4	0	0	1	0	k__Bacteria;p__Proteobacteria;c__Gammaproteobacteria;o__Betaproteobacteriales
Otu001712	1	2	0	0	1	0	0	1	2	1	0	0	0	0	0	0	0	0	k__Bacteria;p__Proteobacteria;c__Gammaproteobacteria;o__Steroidobacterales;f__Steroidobacteraceae;g__;s__
Otu001713	1	0	1	0	0	0	0	0	1	0	0	0	1	2	0	0	2	0	k__Bacteria;p__Bacteroidetes;c__Bacteroidia;o__Bacteroidales;f__Muribaculaceae
Otu001714	2	0	0	0	0	0	0	1	1	0	1	2	1	0	0	0	0	0	k__Bacteria;p__Firmicutes;c__Clostridia;o__Clostridiales;f__Family_XIII;g__Eubacterium_brachy_group;s__
Otu001715	0	0	0	0	0	0	0	0	0	1	5	2	0	0	0	0	0	0	k__Bacteria;p__Bacteroidetes;c__Bacteroidia;o__Bacteroidales;f__Muribaculaceae;g__;s__
Otu001716	0	1	0	0	0	0	0	1	3	0	0	0	3	0	0	0	0	0	k__Bacteria;p__Bacteroidetes;c__Ignavibacteria;o__OPB56;f__;g__;s__
Otu001717	0	1	1	0	0	0	2	0	1	1	1	0	1	0	0	0	0	0	k__Bacteria;p__Proteobacteria;c__Gammaproteobacteria;o__Betaproteobacteriales;f__Nitrosomonadaceae;g__MND1;s__
Otu001718	1	3	0	0	0	0	1	0	1	0	1	0	1	0	0	0	0	0	k__Bacteria;p__Proteobacteria;c__Deltaproteobacteria;o__Desulfovibrionales;f__Desulfovibrionaceae;g__Desulfovibrio;s__Desulfovibrio_putealis_DSM_16056
Otu001719	0	2	1	0	0	0	0	0	2	0	0	3	0	0	0	0	0	0	k__Bacteria;p__Firmicutes;c__Clostridia;o__Clostridiales;f__Family_XIII;g__Eubacterium_brachy_group;s__
Otu001720	0	1	0	0	0	0	0	1	2	1	0	0	0	0	0	0	3	0	k__Bacteria;p__Bacteroidetes;c__Bacteroidia;o__Bacteroidales;f__Muribaculaceae;g__;s__
Otu001721	0	0	6	0	0	0	0	1	1	0	0	0	0	0	0	0	0	0	k__Bacteria;p__Gemmatimonadetes;c__BD2-11_terrestrial_group;o__;f__;g__;s__
Otu001722	0	1	1	0	1	0	2	0	0	0	0	0	2	1	0	0	0	0	k__Bacteria;p__Firmicutes;c__Clostridia;o__Clostridiales;f__Christensenellaceae;g__;s__
Otu001723	0	1	2	0	0	1	0	0	3	0	0	0	0	1	0	0	0	0	k__Bacteria;p__Proteobacteria;c__Gammaproteobacteria;o__Betaproteobacteriales;f__Methylophilaceae;g__Methylobacillus
Otu001724	0	1	0	0	0	0	0	2	2	0	0	0	0	1	0	0	0	2	k__Bacteria;p__Bacteroidetes;c__Bacteroidia;o__Bacteroidales;f__Marinifilaceae;g__Odoribacter
Otu001725	0	1	0	0	0	0	0	0	0	0	4	0	3	0	0	0	0	0	k__Bacteria;p__Actinobacteria;c__Thermoleophilia;o__Solirubrobacterales;f__Solirubrobacteraceae;g__Solirubrobacter;s__
Otu001726	0	0	0	2	0	0	0	0	1	1	4	0	0	0	0	0	0	0	k__Bacteria;p__Acidobacteria;c__Subgroup_6
Otu001727	0	0	0	0	3	0	0	0	2	1	0	0	2	0	0	0	0	0	k__Bacteria
Otu001728	0	0	0	0	0	0	0	0	0	0	7	1	0	0	0	0	0	0	k__Bacteria;p__Firmicutes;c__Clostridia;o__Clostridiales;f__Lachnospiraceae;g__Lachnospiraceae_NK4A136_group
Otu001729	1	1	0	0	0	0	0	0	0	2	1	0	1	1	0	0	1	0	k__Bacteria;p__Bacteroidetes;c__Bacteroidia;o__Bacteroidales;f__Muribaculaceae;g__;s__
Otu001730	0	0	0	0	0	0	0	1	0	0	0	0	0	3	0	3	1	0	k__Bacteria;p__Firmicutes;c__Clostridia;o__Clostridiales;f__Ruminococcaceae;g__Ruminococcaceae_UCG-014;s__
Otu001731	0	0	0	0	0	1	1	0	1	2	0	0	2	0	0	1	0	0	k__Bacteria;p__Proteobacteria;c__Gammaproteobacteria;o__Betaproteobacteriales;f__Nitrosomonadaceae;g__MND1;s__
Otu001732	0	1	0	0	0	0	0	0	0	2	3	0	2	0	0	0	0	0	k__Bacteria;p__Proteobacteria;c__Gammaproteobacteria;o__Xanthomonadales;f__Rhodanobacteraceae;g__;s__
Otu001733	0	2	0	1	0	0	0	1	2	1	1	0	0	0	0	0	0	0	k__Bacteria;p__Bacteroidetes;c__Bacteroidia;o__Chitinophagales;f__Saprospiraceae;g__Phaeodactylibacter;s__
Otu001734	1	0	0	0	2	1	0	1	0	1	0	0	0	1	0	1	0	0	k__Bacteria;p__Bacteroidetes;c__Bacteroidia;o__Bacteroidales;f__Muribaculaceae;g__;s__
Otu001735	0	1	0	0	0	0	1	0	3	2	1	0	0	0	0	0	0	0	k__Bacteria;p__Chloroflexi;c__Anaerolineae;o__SBR1031;f__A4b;g__;s__
Otu001736	0	0	0	0	0	0	0	0	2	0	0	0	0	5	0	1	0	0	k__Bacteria;p__Firmicutes;c__Clostridia;o__Clostridiales;f__Lachnospiraceae
Otu001737	0	1	0	2	0	0	0	0	0	2	0	0	1	0	0	1	0	1	k__Bacteria;p__Bacteroidetes;c__Bacteroidia;o__Bacteroidales;f__Muribaculaceae;g__;s__
Otu001738	0	0	1	0	0	3	0	0	0	0	1	1	0	0	2	0	0	0	k__Bacteria;p__Gemmatimonadetes;c__S0134_terrestrial_group;o__;f__;g__;s__
Otu001739	0	0	0	0	0	1	0	0	6	1	0	0	0	0	0	0	0	0	k__Bacteria;p__Actinobacteria;c__Actinobacteria;o__Streptosporangiales;f__Nocardiopsaceae;g__Nocardiopsis
Otu001740	2	0	1	2	0	0	1	1	0	0	0	0	0	0	1	0	0	0	k__Bacteria;p__Bacteroidetes;c__Bacteroidia;o__Bacteroidales;f__Rikenellaceae;g__Alistipes
Otu001741	0	0	0	0	0	1	0	4	0	0	3	0	0	0	0	0	0	0	k__Bacteria;p__Bacteroidetes;c__Bacteroidia;o__Cytophagales;f__Hymenobacteraceae;g__Adhaeribacter;s__
Otu001742	0	0	0	0	0	0	1	0	1	0	0	0	0	0	0	0	2	4	k__Bacteria;p__Firmicutes;c__Erysipelotrichia;o__Erysipelotrichales;f__Erysipelotrichaceae;g__Faecalibaculum;s__
Otu001743	0	1	0	0	0	1	1	0	0	2	1	0	0	0	0	1	1	0	k__Bacteria;p__Bacteroidetes;c__Bacteroidia;o__Bacteroidales;f__Muribaculaceae;g__;s__
Otu001744	0	0	0	0	0	0	0	0	0	4	0	0	0	0	0	0	0	4	k__Bacteria;p__Firmicutes;c__Clostridia;o__Clostridiales;f__Ruminococcaceae
Otu001745	1	0	0	0	0	0	0	0	0	1	0	1	1	0	1	2	1	0	k__Bacteria;p__Bacteroidetes;c__Bacteroidia;o__Bacteroidales;f__Muribaculaceae
Otu001746	0	1	1	0	0	1	0	0	0	3	2	0	0	0	0	0	0	0	k__Bacteria;p__Acidobacteria;c__Thermoanaerobaculia;o__Thermoanaerobaculales;f__Thermoanaerobaculaceae;g__Subgroup_10;s__
Otu001747	0	0	0	1	0	0	0	0	0	2	1	0	0	0	1	2	1	0	k__Bacteria;p__Bacteroidetes;c__Bacteroidia;o__Bacteroidales;f__Muribaculaceae
Otu001748	1	0	0	0	0	2	0	0	0	0	2	0	0	1	1	1	0	0	k__Bacteria;p__Acidobacteria;c__Blastocatellia_Subgroup_4;o__11-24;f__;g__;s__
Otu001749	0	0	0	0	4	0	0	4	0	0	0	0	0	0	0	0	0	0	k__Bacteria;p__Tenericutes;c__Mollicutes;o__Mollicutes_RF39;f__;g__;s__
Otu001750	1	0	0	1	0	0	1	0	1	0	4	0	0	0	0	0	0	0	k__Bacteria;p__Proteobacteria;c__Gammaproteobacteria;o__Betaproteobacteriales
Otu001751	0	0	0	0	0	0	2	0	2	1	3	0	0	0	0	0	0	0	k__Bacteria;p__Bacteroidetes;c__Bacteroidia;o__Bacteroidales;f__Bacteroidetes_vadinHA17;g__;s__
Otu001752	0	0	0	1	1	0	0	0	3	0	1	1	1	0	0	0	0	0	k__Bacteria;p__Proteobacteria;c__Alphaproteobacteria;o__Sphingomonadales;f__Sphingomonadaceae;g__Altererythrobacter
Otu001753	0	0	0	0	0	0	0	1	4	3	0	0	0	0	0	0	0	0	k__Bacteria;p__Acidobacteria;c__Acidobacteriia;o__Acidobacteriales;f__Koribacteraceae;g__Candidatus_Koribacter;s__
Otu001754	0	0	0	0	8	0	0	0	0	0	0	0	0	0	0	0	0	0	k__Bacteria;p__Firmicutes;c__Clostridia;o__Clostridiales;f__Ruminococcaceae
Otu001755	0	0	0	0	0	0	1	0	3	2	0	0	0	0	1	0	0	1	k__Bacteria;p__Proteobacteria;c__Deltaproteobacteria;o__Myxococcales;f__Haliangiaceae;g__Haliangium;s__
Otu001756	0	0	0	0	0	0	0	0	4	0	2	0	2	0	0	0	0	0	k__Bacteria;p__Gemmatimonadetes;c__Gemmatimonadetes;o__Gemmatimonadales;f__Gemmatimonadaceae
Otu001757	0	0	1	0	2	0	1	1	0	0	1	0	2	0	0	0	0	0	k__Bacteria;p__Gemmatimonadetes;c__Gemmatimonadetes;o__Gemmatimonadales;f__Gemmatimonadaceae
Otu001758	0	1	2	0	0	0	0	0	2	1	0	1	0	0	0	0	1	0	k__Bacteria;p__Proteobacteria;c__Deltaproteobacteria;o__NB1-j;f__;g__;s__
Otu001759	1	0	0	0	0	0	1	0	0	0	0	0	1	2	0	2	0	1	k__Bacteria;p__Bacteroidetes;c__Bacteroidia;o__Bacteroidales;f__Muribaculaceae;g__;s__
Otu001760	0	0	0	0	1	0	0	0	1	0	1	1	0	2	0	0	1	0	k__Bacteria;p__Proteobacteria;c__Gammaproteobacteria;o__Xanthomonadales;f__Rhodanobacteraceae;g__Tahibacter;s__
Otu001761	0	0	0	0	0	0	0	0	7	0	0	0	0	0	0	0	0	0	k__Bacteria;p__Gemmatimonadetes;c__Gemmatimonadetes;o__Gemmatimonadales;f__Gemmatimonadaceae
Otu001762	0	0	0	0	1	0	1	0	3	1	1	0	0	0	0	0	0	0	k__Bacteria;p__Acidobacteria;c__Subgroup_6;o__;f__;g__;s__
Otu001763	0	0	1	0	0	0	2	0	2	0	0	1	1	0	0	0	0	0	k__Bacteria;p__Planctomycetes;c__Phycisphaerae;o__Phycisphaerales;f__Phycisphaeraceae;g__SM1A02;s__
Otu001764	0	3	0	0	0	0	2	0	2	0	0	0	0	0	0	0	0	0	k__Bacteria;p__Bacteroidetes;c__Rhodothermia;o__Rhodothermales;f__Rhodothermaceae;g__;s__
Otu001765	0	0	1	0	0	1	0	0	1	1	0	0	3	0	0	0	0	0	k__Bacteria;p__Proteobacteria;c__Gammaproteobacteria;o__Betaproteobacteriales;f__Rhodocyclaceae;g__Dechloromonas
Otu001766	0	0	0	0	0	0	0	0	0	0	3	0	0	3	0	0	1	0	k__Bacteria;p__Elusimicrobia;c__Lineage_IIa;o__;f__;g__;s__
Otu001767	0	0	0	0	4	0	0	0	0	0	1	0	2	0	0	0	0	0	k__Bacteria;p__Acidobacteria;c__Subgroup_6;o__;f__;g__;s__
Otu001768	0	0	0	0	0	0	1	1	4	0	1	0	0	0	0	0	0	0	k__Bacteria;p__Hydrogenedentes;c__Hydrogenedentia;o__Hydrogenedentiales;f__Hydrogenedensaceae;g__;s__
Otu001769	0	0	1	0	0	0	0	1	0	0	1	0	0	2	0	2	0	0	k__Bacteria;p__Bacteroidetes;c__Bacteroidia;o__Bacteroidales;f__Muribaculaceae
Otu001770	1	0	2	0	0	0	1	0	0	0	0	0	3	0	0	0	0	0	k__Bacteria;p__Firmicutes;c__Clostridia;o__Clostridiales;f__Lachnospiraceae;g__Tyzzerella_3
Otu001771	0	0	0	0	0	2	0	0	1	2	1	0	1	0	0	0	0	0	k__Bacteria;p__Firmicutes;c__Bacilli;o__Bacillales
Otu001772	0	1	3	0	0	0	0	0	0	0	1	0	1	0	0	0	1	0	k__Bacteria;p__Firmicutes;c__Bacilli;o__Lactobacillales;f__Lactobacillaceae;g__Lactobacillus
Otu001773	0	0	0	0	7	0	0	0	0	0	0	0	0	0	0	0	0	0	k__Bacteria;p__Tenericutes;c__Mollicutes;o__Mollicutes_RF39
Otu001774	0	0	1	0	0	1	1	0	0	2	1	1	0	0	0	0	0	0	k__Bacteria;p__Proteobacteria;c__Deltaproteobacteria;o__NB1-j;f__;g__;s__
Otu001775	3	0	0	0	0	0	0	0	2	0	0	1	0	0	0	1	0	0	k__Bacteria;p__Actinobacteria;c__MB-A2-108;o__;f__;g__;s__
Otu001776	2	0	0	0	0	2	0	0	2	0	1	0	0	0	0	0	0	0	k__Bacteria;p__Actinobacteria;c__Actinobacteria;o__Frankiales;f__Cryptosporangiaceae;g__Fodinicola;s__
Otu001777	0	0	0	0	0	0	2	0	0	0	0	0	0	0	0	0	3	2	k__Bacteria;p__Firmicutes;c__Erysipelotrichia;o__Erysipelotrichales;f__Erysipelotrichaceae;g__Faecalibaculum;s__
Otu001778	0	1	0	0	0	0	1	1	2	0	0	2	0	0	0	0	0	0	k__Bacteria;p__Proteobacteria;c__Alphaproteobacteria;o__Tistrellales;f__Geminicoccaceae;g__;s__
Otu001779	0	2	1	0	0	0	1	1	2	0	0	0	0	0	0	0	0	0	k__Bacteria;p__Chloroflexi;c__Anaerolineae;o__Caldilineales;f__Caldilineaceae;g__;s__
Otu001780	0	0	0	0	0	3	0	1	2	0	0	1	0	0	0	0	0	0	k__Bacteria;p__Actinobacteria;c__Thermoleophilia;o__Solirubrobacterales;f__67-14;g__;s__
Otu001781	0	2	0	0	0	2	0	0	0	1	2	0	0	0	0	0	0	0	k__Bacteria;p__Proteobacteria;c__Gammaproteobacteria;o__Xanthomonadales;f__Xanthomonadaceae;g__Lysobacter
Otu001782	0	0	1	0	3	1	0	0	0	1	0	0	0	1	0	0	0	0	k__Bacteria;p__Firmicutes;c__Clostridia;o__Clostridiales;f__Ruminococcaceae;g__Intestinimonas;s__
Otu001783	0	0	0	0	1	0	1	0	1	1	0	0	0	0	0	0	2	1	k__Bacteria;p__Bacteroidetes;c__Bacteroidia;o__Bacteroidales;f__Muribaculaceae;g__;s__
Otu001784	0	1	0	0	0	0	0	0	0	0	4	1	1	0	0	0	0	0	k__Bacteria;p__Proteobacteria;c__Gammaproteobacteria;o__Xanthomonadales;f__Xanthomonadaceae;g__Arenimonas;s__
Otu001785	0	0	1	0	1	0	1	0	0	0	1	0	3	0	0	0	0	0	k__Bacteria;p__Bacteroidetes;c__Bacteroidia;o__Bacteroidales;f__Muribaculaceae
Otu001786	1	1	2	0	0	0	0	0	0	0	1	0	2	0	0	0	0	0	k__Bacteria;p__Planctomycetes;c__Planctomycetacia;o__Pirellulales;f__Pirellulaceae;g__Pirellula;s__
Otu001787	2	0	0	0	0	0	0	1	3	0	0	0	1	0	0	0	0	0	k__Bacteria
Otu001788	0	0	0	0	0	0	0	1	4	1	1	0	0	0	0	0	0	0	k__Bacteria;p__Chloroflexi;c__OLB14
Otu001789	0	1	0	0	0	0	0	1	0	1	0	1	0	1	0	2	0	0	k__Bacteria;p__Bacteroidetes;c__Bacteroidia;o__Bacteroidales;f__Muribaculaceae;g__;s__
Otu001790	0	0	0	1	1	0	0	1	0	0	1	1	0	2	0	0	0	0	k__Bacteria;p__Chloroflexi;c__KD4-96;o__;f__;g__;s__
Otu001791	0	0	1	0	0	2	0	0	1	1	2	0	0	0	0	0	0	0	k__Bacteria;p__Rokubacteria;c__NC10;o__Rokubacteriales;f__;g__;s__
Otu001792	0	0	0	0	0	0	0	0	4	0	0	1	2	0	0	0	0	0	k__Bacteria;p__Bacteroidetes;c__Bacteroidia;o__Chitinophagales;f__Chitinophagaceae
Otu001793	0	0	0	1	0	1	0	0	0	0	0	3	2	0	0	0	0	0	k__Bacteria;p__Chloroflexi;c__Gitt-GS-136;o__;f__;g__;s__
Otu001794	0	0	3	0	0	0	0	0	1	1	1	0	1	0	0	0	0	0	k__Bacteria;p__Bacteroidetes;c__Bacteroidia;o__Bacteroidales;f__Muribaculaceae
Otu001795	0	0	0	0	0	0	0	0	0	4	0	0	1	0	1	0	0	1	k__Bacteria;p__Firmicutes;c__Clostridia;o__Clostridiales;f__Lachnospiraceae;g__Ruminococcus_gauvreauii_group;s__Ruminococcus_gauvreauii
Otu001796	1	0	3	0	0	1	0	0	1	0	1	0	0	0	0	0	0	0	k__Bacteria;p__Proteobacteria;c__Gammaproteobacteria;o__Betaproteobacteriales;f__Nitrosomonadaceae;g__;s__
Otu001797	0	0	0	0	0	0	0	0	0	2	0	0	1	0	3	0	1	0	k__Bacteria
Otu001798	0	0	0	0	0	0	1	0	0	0	1	0	1	0	1	0	0	3	k__Bacteria;p__Cyanobacteria;c__Oxyphotobacteria;o__Chloroplast;f__Cercis_gigantea;g__;s__
Otu001799	0	0	2	0	0	3	0	0	0	1	1	0	0	0	0	0	0	0	k__Bacteria;p__Chloroflexi;c__Anaerolineae;o__SBR1031;f__anaerobic_bacterium_MO-CFX2;g__;s__
Otu001800	0	0	3	0	0	0	0	3	0	0	0	0	0	0	0	1	0	0	k__Bacteria;p__Firmicutes;c__Clostridia;o__Clostridiales;f__Ruminococcaceae;g__Ruminococcaceae_UCG-014;s__
Otu001801	0	2	0	0	0	0	0	0	0	0	3	0	0	1	0	1	0	0	k__Bacteria;p__Bacteroidetes;c__Bacteroidia;o__Flavobacteriales;f__Flavobacteriaceae;g__Flavobacterium
Otu001802	0	0	0	0	0	0	0	0	1	2	0	0	1	0	0	0	2	1	k__Bacteria;p__Bacteroidetes;c__Bacteroidia;o__Bacteroidales;f__Muribaculaceae
Otu001803	0	0	1	0	0	0	0	1	0	1	0	1	3	0	0	0	0	0	k__Bacteria;p__Cyanobacteria;c__Melainabacteria;o__Obscuribacterales;f__;g__;s__
Otu001804	0	1	0	0	0	0	0	1	4	1	0	0	0	0	0	0	0	0	k__Bacteria;p__Planctomycetes;c__Planctomycetacia;o__Pirellulales;f__Pirellulaceae;g__Pirellula
Otu001805	0	0	0	0	0	0	1	0	0	1	2	0	0	1	0	1	0	1	k__Bacteria;p__Acidobacteria;c__Subgroup_6
Otu001806	0	1	0	0	0	0	1	0	2	0	1	1	0	0	0	0	0	1	k__Bacteria;p__Proteobacteria;c__Alphaproteobacteria;o__Rhizobiales;f__Xanthobacteraceae
Otu001807	0	0	0	0	0	0	0	0	2	4	1	0	0	0	0	0	0	0	k__Bacteria;p__Chloroflexi;c__Anaerolineae;o__SBR1031;f__A4b;g__;s__
Otu001808	0	0	0	0	0	0	0	0	0	1	2	0	1	0	0	0	3	0	k__Bacteria;p__Actinobacteria;c__Actinobacteria;o__Corynebacteriales;f__Nocardiaceae;g__Rhodococcus
Otu001809	2	0	0	0	0	0	1	0	2	0	1	1	0	0	0	0	0	0	k__Bacteria;p__Bacteroidetes;c__Bacteroidia;o__Flavobacteriales;f__Flavobacteriaceae;g__Flavobacterium;s__
Otu001810	0	1	2	0	0	0	2	0	1	0	1	0	0	0	0	0	0	0	k__Bacteria;p__Patescibacteria;c__Microgenomatia;o__Candidatus_Amesbacteria
Otu001811	1	0	0	0	0	0	0	0	0	0	1	0	0	0	0	5	0	0	k__Bacteria;p__Acidobacteria;c__Blastocatellia_Subgroup_4;o__11-24;f__;g__;s__
Otu001812	1	0	0	0	5	0	0	0	1	0	0	0	0	0	0	0	0	0	k__Bacteria;p__Firmicutes;c__Clostridia;o__Clostridiales;f__Ruminococcaceae
Otu001813	0	0	0	0	0	0	0	1	0	0	0	0	0	0	0	0	1	5	k__Bacteria;p__Firmicutes;c__Clostridia;o__Clostridiales;f__Ruminococcaceae;g__Ruminococcaceae_UCG-010;s__
Otu001814	0	0	0	1	0	0	0	0	1	0	1	1	2	1	0	0	0	0	k__Bacteria;p__Chloroflexi;c__Anaerolineae;o__Ardenticatenales;f__;g__;s__
Otu001815	0	0	0	0	0	0	1	0	0	1	1	0	4	0	0	0	0	0	k__Bacteria;p__Proteobacteria;c__Gammaproteobacteria;o__Betaproteobacteriales;f__Burkholderiaceae
Otu001816	0	0	0	0	0	0	0	0	1	0	6	0	0	0	0	0	0	0	k__Bacteria;p__Proteobacteria;c__Gammaproteobacteria;o__KF-JG30-C25;f__;g__;s__
Otu001817	1	0	0	1	0	0	1	0	0	0	0	0	1	1	0	1	1	0	k__Bacteria;p__Bacteroidetes;c__Bacteroidia;o__Bacteroidales;f__Muribaculaceae;g__;s__
Otu001818	0	0	0	0	0	0	0	0	0	0	0	1	1	2	2	1	0	0	k__Bacteria;p__Bacteroidetes;c__Bacteroidia;o__Bacteroidales;f__Muribaculaceae;g__;s__
Otu001819	0	2	0	0	0	0	0	1	0	0	3	0	0	1	0	0	0	0	k__Bacteria;p__Proteobacteria;c__Deltaproteobacteria
Otu001820	0	0	0	0	0	0	0	0	0	0	3	0	0	2	0	1	1	0	k__Bacteria;p__Proteobacteria;c__Gammaproteobacteria;o__Betaproteobacteriales;f__B1-7BS;g__;s__
Otu001821	0	2	0	0	0	0	0	0	0	0	0	4	0	0	0	0	1	0	k__Bacteria;p__Proteobacteria;c__Alphaproteobacteria;o__Sphingomonadales;f__Sphingomonadaceae;g__Sphingomonas;s__Sphingomonas_koreensis
Otu001822	0	0	1	0	0	0	0	0	3	3	0	0	0	0	0	0	0	0	k__Bacteria;p__Chloroflexi;c__JG30-KF-CM66;o__;f__;g__;s__
Otu001823	2	0	0	0	0	0	0	0	3	0	1	0	1	0	0	0	0	0	k__Bacteria;p__Chloroflexi;c__Anaerolineae;o__SBR1031;f__A4b;g__;s__
Otu001824	0	0	0	0	0	0	0	0	1	3	2	0	1	0	0	0	0	0	k__Bacteria;p__Acidobacteria;c__Holophagae;o__Subgroup_7;f__;g__;s__
Otu001825	0	0	0	0	7	0	0	0	0	0	0	0	0	0	0	0	0	0	k__Bacteria;p__Firmicutes;c__Clostridia;o__Clostridiales;f__Ruminococcaceae;g__Ruminiclostridium_5
Otu001826	0	0	3	0	2	0	0	0	0	0	1	0	0	1	0	0	0	0	k__Bacteria;p__Acidobacteria;c__Thermoanaerobaculia;o__Thermoanaerobaculales;f__Thermoanaerobaculaceae;g__Subgroup_10;s__
Otu001827	0	0	1	0	0	0	2	0	2	0	2	0	0	0	0	0	0	0	k__Bacteria;p__Bacteroidetes;c__Ignavibacteria;o__Ignavibacteriales;f__Ignavibacteriaceae;g__Ignavibacterium
Otu001828	0	0	0	0	0	0	1	0	0	0	2	0	1	0	0	0	0	3	k__Bacteria;p__Acidobacteria;c__Subgroup_5;o__;f__;g__;s__
Otu001829	0	0	0	0	0	0	0	0	2	1	2	0	0	1	0	0	0	1	k__Bacteria;p__Proteobacteria;c__Gammaproteobacteria;o__Betaproteobacteriales;f__Burkholderiaceae
Otu001830	0	0	0	0	0	0	2	0	4	0	0	0	0	1	0	0	0	0	k__Bacteria;p__Proteobacteria;c__Gammaproteobacteria
Otu001831	1	1	0	0	0	0	0	0	1	0	3	0	0	0	0	0	0	1	k__Bacteria;p__Planctomycetes;c__Planctomycetacia;o__Pirellulales;f__Pirellulaceae;g__;s__
Otu001832	0	0	2	0	0	0	0	0	0	0	3	2	0	0	0	0	0	0	k__Bacteria;p__Acidobacteria;c__Subgroup_17;o__;f__;g__;s__
Otu001833	0	0	1	0	0	0	0	1	0	0	1	4	0	0	0	0	0	0	k__Bacteria;p__Chloroflexi;c__Anaerolineae;o__SBR1031;f__;g__;s__
Otu001834	0	0	0	0	1	0	0	0	1	0	0	3	2	0	0	0	0	0	k__Bacteria;p__Actinobacteria;c__Acidimicrobiia;o__Microtrichales
Otu001835	0	1	0	2	0	0	0	0	4	0	0	0	0	0	0	0	0	0	k__Bacteria;p__Firmicutes;c__Clostridia;o__Clostridiales;f__Lachnospiraceae
Otu001836	3	0	1	2	0	0	0	1	0	0	0	0	0	0	0	0	0	0	k__Bacteria;p__Chloroflexi;c__Anaerolineae;o__SJA-15;f__;g__;s__
Otu001837	0	1	0	0	0	0	0	0	3	0	0	2	1	0	0	0	0	0	k__Bacteria;p__Proteobacteria;c__Alphaproteobacteria;o__Rhizobiales;f__Rhizobiaceae;g__Ochrobactrum
Otu001838	0	0	1	0	0	1	0	1	0	0	3	0	0	0	1	0	0	0	k__Bacteria;p__Proteobacteria;c__Gammaproteobacteria;o__Cellvibrionales
Otu001839	0	0	1	0	0	1	0	0	5	0	0	0	0	0	0	0	0	0	k__Bacteria;p__Planctomycetes;c__Planctomycetacia;o__Planctomycetales
Otu001840	3	2	0	0	0	0	0	0	2	0	0	0	0	0	0	0	0	0	k__Bacteria;p__Firmicutes;c__Clostridia;o__Clostridiales;f__Lachnospiraceae;g__Acetatifactor;s__
Otu001841	0	0	0	0	0	1	2	0	0	0	0	0	0	1	0	2	0	1	k__Bacteria;p__Bacteroidetes;c__Bacteroidia;o__Bacteroidales;f__Muribaculaceae;g__;s__
Otu001842	0	1	0	0	0	1	1	0	1	0	1	2	0	0	0	0	0	0	k__Bacteria;p__Acidobacteria;c__Blastocatellia_Subgroup_4;o__Blastocatellales;f__Blastocatellaceae
Otu001843	0	0	0	0	0	7	0	0	0	0	0	0	0	0	0	0	0	0	k__Bacteria;p__Firmicutes;c__Clostridia;o__Clostridiales;f__Ruminococcaceae;g__Pygmaiobacter;s__
Otu001844	0	0	0	0	0	0	1	0	1	1	2	0	0	0	0	0	2	0	k__Bacteria;p__Planctomycetes;c__OM190;o__;f__;g__;s__
Otu001845	0	0	2	0	0	1	0	0	0	0	1	2	0	0	0	0	1	0	k__Bacteria;p__Firmicutes;c__Clostridia;o__Clostridiales;f__Ruminococcaceae
Otu001846	0	0	0	0	0	0	0	0	0	0	0	0	0	0	0	0	3	4	k__Bacteria;p__Firmicutes;c__Erysipelotrichia;o__Erysipelotrichales;f__Erysipelotrichaceae
Otu001847	0	0	0	0	0	0	0	0	5	0	1	0	0	1	0	0	0	0	k__Bacteria;p__Proteobacteria;c__Alphaproteobacteria;o__Dongiales;f__Dongiaceae;g__Dongia;s__
Otu001848	0	1	3	0	0	0	0	0	1	2	0	0	0	0	0	0	0	0	k__Bacteria;p__Proteobacteria;c__Alphaproteobacteria;o__Rhizobiales;f__KF-JG30-B3;g__;s__
Otu001849	0	0	1	0	0	0	0	0	3	1	1	0	1	0	0	0	0	0	k__Bacteria;p__Planctomycetes;c__Phycisphaerae;o__Tepidisphaerales;f__WD2101_soil_group;g__;s__
Otu001850	0	0	0	0	0	1	0	0	2	1	2	0	1	0	0	0	0	0	k__Bacteria;p__Proteobacteria;c__Gammaproteobacteria;o__Xanthomonadales;f__Rhodanobacteraceae;g__;s__
Otu001851	0	1	0	0	0	0	0	1	3	0	1	0	1	0	0	0	0	0	k__Bacteria;p__Chloroflexi;c__Anaerolineae;o__Anaerolineales;f__Anaerolineaceae;g__;s__
Otu001852	0	1	1	0	0	0	2	0	1	1	0	1	0	0	0	0	0	0	k__Bacteria;p__Gemmatimonadetes;c__AKAU4049;o__;f__;g__;s__
Otu001853	0	0	0	0	0	0	0	0	0	0	3	0	0	4	0	0	0	0	k__Bacteria;p__Proteobacteria;c__Gammaproteobacteria;o__Xanthomonadales;f__Xanthomonadaceae;g__Pseudoxanthomonas
Otu001854	0	0	0	0	0	0	0	1	0	1	3	0	0	1	0	0	0	1	k__Bacteria;p__Gemmatimonadetes;c__Gemmatimonadetes;o__Gemmatimonadales;f__Gemmatimonadaceae;g__Gemmatimonas
Otu001855	0	1	0	0	0	1	0	0	1	1	0	0	0	1	0	1	0	1	k__Bacteria;p__Acidobacteria;c__Acidobacteriia;o__Solibacterales;f__Solibacteraceae_Subgroup_3;g__Bryobacter
Otu001856	0	0	0	0	0	0	1	0	1	2	0	3	0	0	0	0	0	0	k__Bacteria;p__Chloroflexi;c__Chloroflexia;o__Thermomicrobiales;f__AKYG1722;g__;s__
Otu001857	0	0	1	2	0	0	0	0	0	0	1	0	0	0	0	2	1	0	k__Bacteria;p__Firmicutes;c__Bacilli;o__Lactobacillales;f__Lactobacillaceae;g__Lactobacillus
Otu001858	0	1	0	0	0	0	0	0	0	0	0	1	2	0	1	0	1	1	k__Bacteria;p__Bacteroidetes;c__Bacteroidia;o__Bacteroidales;f__Muribaculaceae;g__;s__
Otu001859	0	0	1	1	0	0	3	0	0	0	0	2	0	0	0	0	0	0	k__Bacteria;p__Firmicutes;c__Clostridia;o__Clostridiales;f__Christensenellaceae;g__;s__
Otu001860	0	0	0	1	0	2	0	0	0	1	0	0	0	1	1	0	1	0	k__Bacteria;p__Bacteroidetes;c__Bacteroidia;o__Bacteroidales;f__Muribaculaceae;g__;s__
Otu001861	1	2	0	0	0	0	0	0	0	0	0	2	1	0	1	0	0	0	k__Bacteria;p__Bacteroidetes;c__Bacteroidia;o__Bacteroidales;f__Muribaculaceae;g__;s__
Otu001862	0	1	0	0	0	0	0	0	0	2	0	0	1	1	0	1	1	0	k__Bacteria;p__Bacteroidetes;c__Bacteroidia;o__Bacteroidales;f__Muribaculaceae
Otu001863	0	0	0	0	1	0	0	0	4	0	2	0	0	0	0	0	0	0	k__Bacteria;p__Proteobacteria;c__Alphaproteobacteria
Otu001864	1	0	0	0	0	0	0	2	0	0	4	0	0	0	0	0	0	0	k__Bacteria;p__Proteobacteria;c__Gammaproteobacteria;o__Betaproteobacteriales;f__Rhodocyclaceae
Otu001865	1	0	0	0	0	0	1	0	0	0	2	1	2	0	0	0	0	0	k__Bacteria;p__Bacteroidetes;c__Bacteroidia;o__Chitinophagales;f__Saprospiraceae;g__;s__
Otu001866	0	1	0	0	0	0	2	0	3	0	0	0	1	0	0	0	0	0	k__Bacteria;p__Actinobacteria;c__Acidimicrobiia;o__;f__;g__;s__
Otu001867	1	2	0	0	0	0	0	0	1	0	1	0	2	0	0	0	0	0	k__Bacteria;p__Chloroflexi;c__Anaerolineae;o__Ardenticatenales;f__;g__;s__
Otu001868	0	0	0	0	0	0	0	0	3	0	1	0	0	2	0	1	0	0	k__Bacteria;p__Proteobacteria;c__Deltaproteobacteria;o__Bdellovibrionales;f__Bdellovibrionaceae;g__OM27_clade;s__
Otu001869	0	1	1	0	0	1	0	0	1	0	0	0	1	0	2	0	0	0	k__Bacteria;p__Bacteroidetes;c__Bacteroidia;o__Chitinophagales;f__Chitinophagaceae;g__Flavihumibacter;s__Flavihumibacter_sp_CACIAM_22H1
Otu001870	0	2	0	0	2	0	1	0	0	0	0	0	0	0	1	0	0	1	k__Bacteria;p__Bacteroidetes;c__Bacteroidia;o__Bacteroidales;f__Muribaculaceae;g__;s__
Otu001871	0	0	0	0	0	0	2	0	0	2	0	0	3	0	0	0	0	0	k__Bacteria;p__Bacteroidetes;c__Rhodothermia;o__Rhodothermales;f__Rhodothermaceae
Otu001872	0	0	1	1	0	0	0	0	1	1	0	0	1	0	0	0	0	2	k__Bacteria;p__Bacteroidetes;c__Bacteroidia;o__Bacteroidales;f__Muribaculaceae;g__;s__
Otu001873	0	0	0	0	0	0	0	1	2	1	0	0	1	0	0	2	0	0	k__Bacteria;p__Hydrogenedentes;c__Hydrogenedentia;o__Hydrogenedentiales;f__Hydrogenedensaceae;g__;s__
Otu001874	0	0	0	0	0	0	0	0	0	0	1	6	0	0	0	0	0	0	k__Bacteria;p__Bacteroidetes;c__Bacteroidia;o__Bacteroidales;f__Muribaculaceae;g__;s__
Otu001875	0	2	0	0	0	1	0	0	1	0	1	0	0	1	0	0	1	0	k__Bacteria;p__Proteobacteria;c__Deltaproteobacteria;o__Myxococcales;f__Sandaracinaceae;g__;s__
Otu001876	0	1	1	1	0	1	0	2	0	0	0	0	0	0	1	0	0	0	k__Bacteria;p__Bacteroidetes;c__Bacteroidia;o__Bacteroidales;f__Marinifilaceae;g__Odoribacter
Otu001877	0	0	0	0	1	0	0	3	0	2	0	0	0	0	0	0	1	0	k__Bacteria;p__Firmicutes;c__Clostridia;o__Clostridiales;f__Lachnospiraceae
Otu001878	0	0	0	0	0	0	3	0	3	0	1	0	0	0	0	0	0	0	k__Bacteria;p__Planctomycetes;c__Planctomycetacia;o__Planctomycetales;f__Rubinisphaeraceae;g__SH-PL14;s__
Otu001879	0	1	0	0	0	0	0	1	3	0	1	0	1	0	0	0	0	0	k__Bacteria;p__Proteobacteria;c__Alphaproteobacteria
Otu001880	0	0	0	0	2	0	0	0	0	0	1	0	1	3	0	0	0	0	k__Bacteria;p__Actinobacteria;c__Acidimicrobiia;o__IMCC26256;f__;g__;s__
Otu001881	0	1	0	0	0	1	2	0	2	0	0	0	1	0	0	0	0	0	k__Bacteria;p__Acidobacteria;c__Subgroup_25;o__;f__;g__;s__
Otu001882	0	1	0	0	0	0	0	0	5	0	1	0	0	0	0	0	0	0	k__Bacteria;p__Proteobacteria;c__Deltaproteobacteria;o__Myxococcales;f__BIrii41;g__;s__
Otu001883	0	2	2	0	0	0	0	0	0	1	0	1	0	1	0	0	0	0	k__Bacteria;p__Actinobacteria;c__Actinobacteria;o__Propionibacteriales;f__Nocardioidaceae;g__Nocardioides;s__Nocardioides_sp
Otu001884	0	2	0	0	0	0	0	0	0	1	3	0	1	0	0	0	0	0	k__Bacteria;p__Tenericutes;c__Mollicutes;o__Mycoplasmatales;f__Mycoplasmataceae;g__Candidatus_Bacilloplasma;s__
Otu001885	0	0	0	2	0	0	0	0	0	1	1	0	0	0	1	1	1	0	k__Bacteria;p__Proteobacteria;c__Alphaproteobacteria;o__Sphingomonadales;f__Sphingomonadaceae;g__Sphingomonas;s__
Otu001886	1	1	0	0	0	0	0	0	2	2	0	0	1	0	0	0	0	0	k__Bacteria;p__Planctomycetes;c__Planctomycetacia;o__Pirellulales;f__Pirellulaceae;g__Blastopirellula;s__
Otu001887	1	0	0	0	0	2	0	0	0	3	1	0	0	0	0	0	0	0	k__Bacteria
Otu001888	0	0	0	0	1	0	0	2	3	0	0	0	1	0	0	0	0	0	k__Bacteria;p__Bacteroidetes;c__Bacteroidia;o__Chitinophagales;f__Chitinophagaceae;g__;s__
Otu001889	0	2	0	0	0	0	0	0	3	0	0	0	0	0	0	1	1	0	k__Bacteria;p__Proteobacteria;c__Alphaproteobacteria;o__Rhizobiales;f__Beijerinckiaceae;g__Microvirga
Otu001890	0	0	0	0	0	0	0	0	1	2	1	0	0	2	0	0	0	1	k__Bacteria;p__Proteobacteria;c__Gammaproteobacteria
Otu001891	0	0	0	1	0	3	0	0	0	0	2	0	0	0	1	0	0	0	k__Bacteria;p__Firmicutes;c__Clostridia;o__Clostridiales;f__Lachnospiraceae
Otu001892	0	0	4	0	0	0	0	0	0	0	0	2	0	0	0	0	0	1	k__Bacteria;p__Proteobacteria;c__Deltaproteobacteria;o__Myxococcales;f__BIrii41;g__;s__
Otu001893	0	0	0	0	0	0	0	0	1	0	3	0	0	2	0	1	0	0	k__Bacteria;p__Acidobacteria;c__Acidobacteriia;o__Solibacterales;f__Solibacteraceae_Subgroup_3
Otu001894	0	0	0	0	1	0	0	0	2	1	1	0	2	0	0	0	0	0	k__Bacteria;p__Chloroflexi;c__Anaerolineae;o__Anaerolineales;f__Anaerolineaceae;g__;s__
Otu001895	1	0	0	0	0	0	1	0	1	2	0	0	0	0	0	0	1	1	k__Bacteria;p__Chloroflexi;c__Anaerolineae;o__SBR1031;f__A4b;g__;s__
Otu001896	0	3	0	0	0	0	0	0	1	1	1	0	0	0	0	0	0	1	k__Bacteria;p__Proteobacteria;c__Alphaproteobacteria;o__;f__;g__;s__
Otu001897	1	0	0	0	0	0	0	1	1	0	2	2	0	0	0	0	0	0	k__Bacteria;p__Bacteroidetes
Otu001898	1	0	0	0	2	0	0	0	0	2	2	0	0	0	0	0	0	0	k__Bacteria;p__Bacteroidetes;c__Bacteroidia;o__Bacteroidales;f__Prolixibacteraceae;g__WCHB1-32;s__
Otu001899	0	0	1	2	0	0	3	0	0	1	0	0	0	0	0	0	0	0	k__Bacteria;p__Bacteroidetes;c__Bacteroidia;o__Bacteroidales;f__Rikenellaceae;g__Alistipes
Otu001900	0	0	0	1	0	2	0	1	0	0	1	0	0	0	0	1	0	1	k__Bacteria;p__Acidobacteria;c__Thermoanaerobaculia;o__Thermoanaerobaculales;f__Thermoanaerobaculaceae;g__Subgroup_10;s__
Otu001901	0	0	0	0	1	2	0	0	2	2	0	0	0	0	0	0	0	0	k__Bacteria;p__Proteobacteria;c__Gammaproteobacteria;o__Betaproteobacteriales;f__Burkholderiaceae;g__;s__
Otu001902	3	0	0	0	0	0	0	0	4	0	0	0	0	0	0	0	0	0	k__Bacteria;p__Acidobacteria;c__Acidobacteriia;o__Solibacterales;f__Solibacteraceae_Subgroup_3;g__Bryobacter;s__
Otu001903	0	1	0	1	0	0	0	0	2	0	1	1	0	1	0	0	0	0	k__Bacteria;p__Proteobacteria;c__Deltaproteobacteria;o__Desulfuromonadales;f__Geobacteraceae;g__Geobacter
Otu001904	0	1	0	0	0	0	0	0	2	0	3	1	0	0	0	0	0	0	k__Bacteria;p__Chloroflexi;c__Anaerolineae;o__Caldilineales;f__Caldilineaceae;g__;s__
Otu001905	0	0	2	0	0	0	0	0	2	1	1	0	1	0	0	0	0	0	k__Bacteria;p__Proteobacteria;c__Gammaproteobacteria;o__Cellvibrionales;f__Spongiibacteraceae;g__BD1-7_clade;s__
Otu001906	0	0	1	0	0	0	0	0	1	2	2	0	0	0	0	0	0	1	k__Bacteria;p__Proteobacteria;c__Deltaproteobacteria;o__Myxococcales;f__Archangiaceae;g__Anaeromyxobacter
Otu001907	1	0	2	4	0	0	0	0	0	0	0	0	0	0	0	0	0	0	k__Bacteria;p__Bacteroidetes;c__Bacteroidia;o__Bacteroidales
Otu001908	0	0	0	0	0	0	0	0	0	0	0	1	0	1	0	1	3	1	k__Bacteria;p__Bacteroidetes;c__Bacteroidia;o__Bacteroidales;f__Muribaculaceae;g__;s__
Otu001909	0	0	0	0	7	0	0	0	0	0	0	0	0	0	0	0	0	0	k__Bacteria;p__Firmicutes;c__Clostridia;o__Clostridiales;f__Lachnospiraceae
Otu001910	0	1	0	0	0	1	0	0	3	0	1	0	1	0	0	0	0	0	k__Bacteria;p__Proteobacteria;c__Gammaproteobacteria;o__Xanthomonadales;f__Rhodanobacteraceae;g__Pseudofulvimonas;s__
Otu001911	0	1	0	0	2	0	0	1	2	0	0	0	0	1	0	0	0	0	k__Bacteria;p__Proteobacteria;c__Alphaproteobacteria;o__Caulobacterales;f__Caulobacteraceae;g__Brevundimonas
Otu001912	0	0	0	0	0	0	0	1	0	0	2	0	0	0	2	0	2	0	k__Bacteria;p__Firmicutes;c__Clostridia;o__Clostridiales;f__Family_XIII;g__Eubacterium_brachy_group
Otu001913	0	0	0	0	0	0	0	0	2	1	2	0	0	1	0	0	0	1	k__Bacteria;p__Proteobacteria;c__Gammaproteobacteria;o__Betaproteobacteriales;f__Nitrosomonadaceae;g__mle1-7;s__
Otu001914	0	3	0	2	0	0	0	0	0	0	2	0	0	0	0	0	0	0	k__Bacteria;p__Actinobacteria;c__0319-7L14;o__;f__;g__;s__
Otu001915	0	0	2	2	1	1	0	0	0	0	0	0	0	0	0	1	0	0	k__Bacteria;p__Firmicutes;c__Clostridia;o__Clostridiales;f__Ruminococcaceae;g__Eubacterium_coprostanoligenes_group
Otu001916	0	0	0	0	0	0	0	0	3	0	1	2	1	0	0	0	0	0	k__Bacteria;p__Proteobacteria;c__Gammaproteobacteria;o__Betaproteobacteriales;f__Rhodocyclaceae
Otu001917	1	0	0	0	0	1	0	0	0	2	0	1	0	0	0	1	0	1	k__Bacteria;p__Bacteroidetes;c__Bacteroidia;o__Bacteroidales;f__Muribaculaceae;g__;s__
Otu001918	2	0	0	0	0	0	2	0	2	0	0	1	0	0	0	0	0	0	k__Bacteria;p__Proteobacteria;c__Gammaproteobacteria;o__Betaproteobacteriales;f__TRA3-20;g__;s__
Otu001919	0	0	0	0	0	0	1	0	0	0	0	0	0	0	0	0	5	1	k__Bacteria
Otu001920	0	0	1	0	0	0	1	0	1	2	0	0	2	0	0	0	0	0	k__Bacteria;p__Planctomycetes;c__Planctomycetacia;o__Planctomycetales;f__Rubinisphaeraceae;g__Planctomicrobium;s__
Otu001921	2	0	0	0	0	0	0	0	0	2	0	0	1	0	1	1	0	0	k__Bacteria;p__Bacteroidetes;c__Bacteroidia;o__Bacteroidales;f__Muribaculaceae;g__;s__
Otu001922	0	0	0	0	0	1	0	0	2	0	1	1	0	0	0	0	1	0	k__Bacteria;p__Planctomycetes;c__Planctomycetacia;o__Pirellulales;f__Pirellulaceae;g__Pir4_lineage;s__
Otu001923	0	0	0	0	0	0	0	0	0	0	6	0	0	0	0	0	0	0	k__Bacteria;p__Patescibacteria;c__Saccharimonadia;o__Saccharimonadales;f__;g__;s__
Otu001924	0	0	0	0	0	0	2	0	1	1	0	0	2	0	0	0	0	0	k__Bacteria;p__Planctomycetes;c__Planctomycetacia;o__Pirellulales;f__Pirellulaceae;g__Rhodopirellula;s__planctomycete_str_337
Otu001925	0	0	0	0	0	0	0	0	1	0	2	0	0	0	0	0	0	3	k__Bacteria;p__Proteobacteria;c__Gammaproteobacteria;o__Betaproteobacteriales;f__SC-I-84;g__;s__
Otu001926	0	0	0	0	0	1	0	0	0	1	3	0	1	0	0	0	0	0	k__Bacteria;p__Proteobacteria;c__Alphaproteobacteria;o__Acetobacterales;f__Acetobacteraceae;g__Roseomonas
Otu001927	0	0	0	0	0	0	2	1	0	0	2	0	0	0	0	0	0	1	k__Bacteria;p__Proteobacteria;c__Deltaproteobacteria;o__MBNT15;f__;g__;s__
Otu001928	0	0	0	0	2	0	0	0	0	0	2	0	1	0	0	0	0	1	k__Bacteria;p__Planctomycetes;c__Planctomycetacia;o__Pirellulales;f__Pirellulaceae;g__Pir4_lineage;s__
Otu001929	0	0	1	1	0	0	0	1	0	0	0	0	1	1	0	1	0	0	k__Bacteria;p__Bacteroidetes;c__Bacteroidia;o__Bacteroidales;f__Muribaculaceae;g__;s__
Otu001930	0	0	1	0	0	0	0	0	0	0	3	0	0	2	0	0	0	0	k__Bacteria;p__Bacteroidetes;c__Bacteroidia;o__Bacteroidales;f__Dysgonomonadaceae
Otu001931	0	0	0	0	0	0	1	1	1	3	0	0	0	0	0	0	0	0	k__Bacteria;p__Acidobacteria;c__Acidobacteriia;o__Solibacterales;f__Solibacteraceae_Subgroup_3;g__AKIW659;s__
Otu001932	1	0	0	0	0	0	0	0	0	0	1	0	1	1	0	0	1	1	k__Bacteria;p__Bacteroidetes;c__Bacteroidia;o__Bacteroidales;f__Muribaculaceae;g__;s__
Otu001933	0	0	0	0	1	0	0	0	1	0	2	0	2	0	0	0	0	0	k__Bacteria;p__Proteobacteria;c__Alphaproteobacteria;o__Rhizobiales;f__Xanthobacteraceae
Otu001934	1	0	0	0	0	1	0	1	0	0	0	0	0	1	1	0	0	1	k__Bacteria;p__Bacteroidetes;c__Bacteroidia;o__Bacteroidales;f__Muribaculaceae;g__;s__
Otu001935	0	0	0	0	0	0	0	0	1	0	4	0	0	0	0	1	0	0	k__Bacteria;p__Gemmatimonadetes;c__Gemmatimonadetes;o__Gemmatimonadales;f__Gemmatimonadaceae
Otu001936	0	0	0	0	0	1	0	0	1	3	1	0	0	0	0	0	0	0	k__Bacteria;p__Actinobacteria;c__Actinobacteria;o__Micromonosporales;f__Micromonosporaceae;g__Stackebrandtia;s__Stackebrandtia_endophytica
Otu001937	0	1	0	0	0	0	0	0	0	0	1	0	0	3	1	0	0	0	k__Bacteria;p__Acidobacteria;c__Blastocatellia_Subgroup_4;o__11-24
Otu001938	0	0	0	0	0	0	0	0	0	0	0	0	3	0	0	3	0	0	k__Bacteria;p__Firmicutes;c__Clostridia;o__Clostridiales;f__Lachnospiraceae
Otu001939	0	0	1	0	0	0	0	2	0	0	1	0	0	0	0	1	0	1	k__Bacteria;p__Planctomycetes;c__BD7-11;o__;f__;g__;s__
Otu001940	0	2	0	0	0	0	0	0	0	0	2	0	0	1	0	0	0	1	k__Bacteria;p__Bacteroidetes;c__Bacteroidia;o__Cytophagales;f__Microscillaceae;g__;s__
Otu001941	0	0	0	0	0	1	0	1	1	0	2	1	0	0	0	0	0	0	k__Bacteria;p__Actinobacteria;c__Acidimicrobiia;o__Microtrichales;f__Ilumatobacteraceae;g__Ilumatobacter;s__
Otu001942	0	0	0	1	0	2	0	0	0	0	0	0	0	0	0	0	1	2	k__Bacteria;p__Bacteroidetes;c__Bacteroidia;o__Bacteroidales;f__Muribaculaceae;g__;s__
Otu001943	1	0	0	0	0	1	0	0	3	0	1	0	0	0	0	0	0	0	k__Bacteria;p__Acidobacteria;c__Subgroup_22;o__;f__;g__;s__
Otu001944	0	0	0	0	1	0	0	5	0	0	0	0	0	0	0	0	0	0	k__Bacteria;p__Firmicutes;c__Clostridia;o__Clostridiales;f__Ruminococcaceae;g__Ruminococcaceae_UCG-014;s__
Otu001945	2	0	1	0	0	0	0	0	3	0	0	0	0	0	0	0	0	0	k__Bacteria;p__Bacteroidetes;c__Bacteroidia;o__Sphingobacteriales;f__AKYH767;g__;s__
Otu001946	0	0	0	0	0	0	0	0	0	0	1	3	1	0	0	0	1	0	k__Bacteria;p__Proteobacteria;c__Deltaproteobacteria
Otu001947	1	0	0	0	0	0	4	0	0	1	0	0	0	0	0	0	0	0	k__Bacteria;p__Planctomycetes;c__Planctomycetacia;o__Gemmatales;f__Gemmataceae;g__Gemmata;s__
Otu001948	2	0	0	0	2	0	0	0	1	0	0	0	1	0	0	0	0	0	k__Bacteria;p__Proteobacteria;c__Gammaproteobacteria;o__Betaproteobacteriales;f__Rhodocyclaceae
Otu001949	0	1	0	0	0	0	0	0	0	0	0	0	0	4	0	0	1	0	k__Bacteria;p__Firmicutes;c__Clostridia;o__Clostridiales;f__Clostridiales_vadinBB60_group;g__;s__
Otu001950	0	0	0	0	0	0	0	0	5	0	0	0	1	0	0	0	0	0	k__Bacteria;p__Proteobacteria;c__Deltaproteobacteria;o__Desulfuromonadales;f__Geobacteraceae;g__Geothermobacter
Otu001951	0	3	0	0	0	0	0	3	0	0	0	0	0	0	0	0	0	0	k__Bacteria;p__Tenericutes;c__Mollicutes;o__Mollicutes_RF39;f__;g__;s__
Otu001952	1	0	3	0	1	0	0	0	0	0	0	0	1	0	0	0	0	0	k__Bacteria;p__Firmicutes;c__Clostridia;o__Clostridiales;f__Lachnospiraceae;g__Lachnoclostridium
Otu001953	2	0	1	0	0	0	0	1	0	1	0	0	0	0	0	1	0	0	k__Bacteria;p__Bacteroidetes;c__Bacteroidia;o__Bacteroidales;f__Muribaculaceae
Otu001954	0	2	0	0	0	0	0	0	2	0	1	1	0	0	0	0	0	0	k__Bacteria;p__Spirochaetes;c__Spirochaetia;o__Spirochaetales;f__Spirochaetaceae;g__Treponema;s__Treponema_stenostreptum
Otu001955	0	0	0	0	0	0	0	0	5	0	0	1	0	0	0	0	0	0	k__Bacteria;p__Proteobacteria;c__Gammaproteobacteria;o__Betaproteobacteriales;f__Burkholderiaceae;g__Comamonas
Otu001956	1	0	0	0	0	0	0	0	5	0	0	0	0	0	0	0	0	0	k__Bacteria;p__Proteobacteria;c__Alphaproteobacteria;o__Tistrellales;f__Geminicoccaceae;g__;s__
Otu001957	0	0	0	0	0	0	0	0	0	0	6	0	0	0	0	0	0	0	k__Bacteria;p__Firmicutes;c__Clostridia;o__Clostridiales;f__Lachnospiraceae;g__Lachnospiraceae_NK4A136_group;s__Lachnospiraceae_bacterium_DW17
Otu001958	0	0	0	1	0	0	0	1	0	0	1	0	0	0	1	0	2	0	k__Bacteria;p__Proteobacteria;c__Gammaproteobacteria;o__PLTA13;f__;g__;s__
Otu001959	0	0	0	0	0	0	0	0	0	2	4	0	0	0	0	0	0	0	k__Bacteria;p__Acidobacteria;c__Subgroup_25;o__;f__;g__;s__
Otu001960	0	0	0	0	0	0	0	0	2	2	1	0	0	1	0	0	0	0	k__Bacteria;p__Proteobacteria;c__Deltaproteobacteria
Otu001961	0	0	0	0	0	0	0	0	4	0	1	0	0	0	0	0	0	1	k__Bacteria;p__Proteobacteria;c__Alphaproteobacteria;o__Elsterales;f__;g__;s__
Otu001962	0	1	0	0	0	1	0	0	0	1	0	0	1	0	0	1	0	1	k__Bacteria;p__Bacteroidetes;c__Bacteroidia;o__Bacteroidales;f__Muribaculaceae;g__;s__
Otu001963	0	1	1	0	0	0	0	0	2	0	0	0	0	0	0	0	2	0	k__Bacteria;p__Acidobacteria;c__Subgroup_6;o__;f__;g__;s__
Otu001964	0	0	0	0	0	0	0	0	0	1	2	1	1	1	0	0	0	0	k__Bacteria;p__Proteobacteria;c__Alphaproteobacteria;o__Azospirillales;f__Azospirillales_Incertae_Sedis;g__Stella;s__
Otu001965	0	3	1	1	0	0	0	0	0	1	0	0	0	0	0	0	0	0	k__Bacteria;p__Firmicutes;c__Bacilli;o__Lactobacillales;f__Lactobacillaceae;g__Lactobacillus
Otu001966	0	0	1	0	0	0	0	1	3	0	1	0	0	0	0	0	0	0	k__Bacteria;p__Proteobacteria;c__Alphaproteobacteria;o__Rhizobiales;f__Rhizobiales_Incertae_Sedis;g__Nordella;s__
Otu001967	2	0	0	0	0	0	0	0	1	1	0	0	2	0	0	0	0	0	k__Bacteria;p__Acidobacteria;c__Holophagae;o__Subgroup_7;f__;g__;s__
Otu001968	0	0	0	0	0	0	0	0	2	0	3	0	0	1	0	0	0	0	k__Bacteria;p__Proteobacteria;c__Gammaproteobacteria;o__Betaproteobacteriales;f__Nitrosomonadaceae;g__Ellin6067;s__
Otu001969	0	0	1	0	1	0	0	0	1	0	0	0	0	1	2	0	0	0	k__Bacteria;p__Firmicutes;c__Clostridia;o__Clostridiales;f__Lachnospiraceae
Otu001970	1	0	0	1	0	0	0	0	0	0	2	0	1	0	0	1	0	0	k__Bacteria;p__Bacteroidetes;c__Bacteroidia;o__Bacteroidales;f__Muribaculaceae;g__;s__
Otu001971	0	0	0	2	0	0	0	0	0	0	2	0	1	0	0	0	1	0	k__Bacteria;p__Proteobacteria;c__Alphaproteobacteria;o__Rhizobiales;f__Hyphomicrobiaceae
Otu001972	1	1	0	0	0	0	1	0	2	1	0	0	0	0	0	0	0	0	k__Bacteria;p__Proteobacteria;c__Deltaproteobacteria;o__Myxococcales;f__BIrii41;g__;s__
Otu001973	0	0	0	0	0	0	0	0	5	1	0	0	0	0	0	0	0	0	k__Bacteria;p__Bacteroidetes;c__Ignavibacteria;o__Kryptoniales;f__MSB-3C8;g__;s__
Otu001974	3	0	0	0	0	0	0	0	0	1	0	0	2	0	0	0	0	0	k__Bacteria;p__Bacteroidetes;c__Bacteroidia;o__Bacteroidales
Otu001975	3	1	0	2	0	0	0	0	0	0	0	0	0	0	0	0	0	0	k__Bacteria;p__Firmicutes;c__Erysipelotrichia;o__Erysipelotrichales;f__Erysipelotrichaceae;g__Erysipelatoclostridium
Otu001976	0	1	0	0	0	3	0	0	0	1	0	0	1	0	0	0	0	0	k__Bacteria;p__Acidobacteria;c__Subgroup_6;o__;f__;g__;s__
Otu001977	2	0	0	0	0	0	0	0	1	0	0	2	0	0	0	0	1	0	k__Bacteria;p__Proteobacteria;c__Alphaproteobacteria;o__Sphingomonadales;f__Sphingomonadaceae;g__Sphingomonas;s__Sphingomonas_guangdongensis
Otu001978	0	0	0	0	0	0	2	0	0	1	0	2	0	0	0	0	1	0	k__Bacteria;p__Bacteroidetes;c__Bacteroidia;o__Bacteroidales;f__Muribaculaceae;g__;s__
Otu001979	3	0	0	0	2	0	0	0	0	0	0	0	0	1	0	0	0	0	k__Bacteria;p__Firmicutes;c__Clostridia;o__Clostridiales;f__Ruminococcaceae
Otu001980	0	0	0	0	0	0	3	0	1	0	1	0	0	0	0	0	0	1	k__Bacteria;p__Acidobacteria;c__Blastocatellia_Subgroup_4;o__Blastocatellales;f__Blastocatellaceae;g__JGI_0001001-H03;s__
Otu001981	0	0	0	1	0	0	0	0	2	0	2	0	0	1	0	0	0	0	k__Bacteria;p__Proteobacteria;c__Gammaproteobacteria;o__Xanthomonadales
Otu001982	0	0	0	0	0	0	0	0	4	0	0	2	0	0	0	0	0	0	k__Bacteria;p__Patescibacteria;c__Microgenomatia;o__;f__;g__;s__
Otu001983	0	2	0	0	1	0	0	0	1	0	0	0	1	0	0	1	0	0	k__Bacteria;p__Bacteroidetes;c__Bacteroidia;o__Bacteroidales;f__Muribaculaceae;g__;s__
Otu001984	0	0	0	0	0	0	0	1	3	0	1	0	1	0	0	0	0	0	k__Bacteria;p__Acidobacteria;c__Blastocatellia_Subgroup_4;o__Pyrinomonadales;f__Pyrinomonadaceae;g__RB41;s__
Otu001985	0	0	0	0	0	0	0	0	0	0	5	0	1	0	0	0	0	0	k__Bacteria;p__Chloroflexi;c__Anaerolineae;o__SBR1031;f__A4b;g__;s__
Otu001986	0	0	0	2	0	0	0	0	0	0	1	0	0	2	0	1	0	0	k__Bacteria;p__Firmicutes;c__Erysipelotrichia;o__Erysipelotrichales;f__Erysipelotrichaceae;g__Erysipelatoclostridium
Otu001987	0	0	2	2	0	0	1	0	0	0	0	1	0	0	0	0	0	0	k__Bacteria;p__Firmicutes;c__Bacilli;o__Lactobacillales;f__Lactobacillaceae;g__Lactobacillus
Otu001988	0	1	0	0	0	0	0	0	2	0	1	0	1	1	0	0	0	0	k__Bacteria;p__Planctomycetes;c__OM190;o__;f__;g__;s__
Otu001989	2	0	0	0	0	0	0	0	0	1	0	1	0	1	0	0	0	1	k__Bacteria;p__Bacteroidetes;c__Bacteroidia;o__Bacteroidales;f__Muribaculaceae
Otu001990	1	1	0	0	0	0	0	2	0	2	0	0	0	0	0	0	0	0	k__Bacteria;p__Acidobacteria;c__Subgroup_6
Otu001991	0	0	0	0	0	0	1	0	1	0	3	1	0	0	0	0	0	0	k__Bacteria;p__Chloroflexi;c__Anaerolineae;o__SBR1031;f__A4b;g__;s__
Otu001992	0	0	0	0	0	0	0	0	0	0	3	0	0	0	3	0	0	0	k__Bacteria
Otu001993	0	0	0	0	0	0	0	0	5	0	0	1	0	0	0	0	0	0	k__Bacteria;p__Bacteroidetes;c__Bacteroidia;o__Bacteroidales;f__Dysgonomonadaceae;g__Proteiniphilum;s__
Otu001994	0	0	0	0	0	0	2	0	2	2	0	0	0	0	0	0	0	0	k__Bacteria;p__Bacteroidetes;c__Bacteroidia;o__Chitinophagales;f__Chitinophagaceae;g__Chitinophaga
Otu001995	0	0	0	1	0	1	0	0	0	0	0	0	0	3	0	1	0	0	k__Bacteria;p__Bacteroidetes;c__Bacteroidia;o__Bacteroidales;f__Muribaculaceae;g__;s__
Otu001996	1	1	0	1	0	0	0	0	1	0	0	0	0	1	0	0	1	0	k__Bacteria;p__Firmicutes;c__Bacilli;o__Lactobacillales;f__Lactobacillaceae;g__Lactobacillus
Otu001997	0	0	0	0	1	0	0	0	3	2	0	0	0	0	0	0	0	0	k__Bacteria;p__Proteobacteria;c__Gammaproteobacteria;o__Xanthomonadales;f__Xanthomonadaceae
Otu001998	0	0	0	0	0	0	0	0	2	0	0	0	4	0	0	0	0	0	k__Bacteria;p__Acidobacteria;c__Subgroup_6
[truncated: 2,934 more rows]
