# Supplementary figures and images for: Effects of the Cistanche tubulosa Aqueous Extract on the Gut Microbiota of Mice with Intestinal Disorders
Source: Hindawi journal article supplement (doi:10.1155/2021/4936970), 2021-07-14

**a**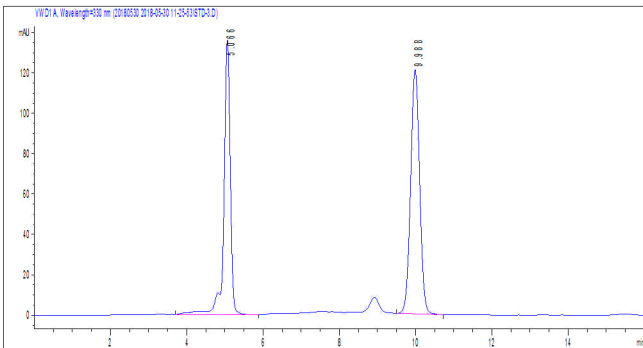**b**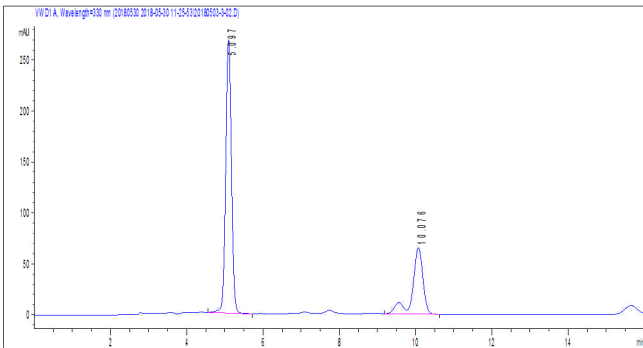

Supplement: f1 [file 4936970.f1.zip]
